# Supplementary material for: Design, synthesis and structure–activity relationship studies on erianin analogues as pyruvate carboxylase inhibitors in hepatocellular carcinoma cells
Source: Royal Society of Chemistry journal article supplement (doi:10.1039/d3ob01114c), 2023-01-01
Supplement: d3ob01114c1.pdf [file d3ob01114c1.pdf]

Electronic Supplementary Material (ESI) for Organic & Biomolecular Chemistry.

This journal is © The Royal Society of Chemistry 2023

Design, Synthesis and Structure–Activity Relationship Studies on Erianin Analogues  
as Pyruvate Carboxylase (PC) Inhibitors Against Hepatocellular Carcinoma Cells

Hailong Shi,<sup>†a,b,c</sup> Jinlian Yang,<sup>†a,b,c</sup> Zeen Qiao, <sup>† a,b</sup> Lingyu Li, <sup>a,b</sup> Gang, Liu, <sup>a,b</sup> Qi Dai,<sup>c</sup> Li Xu,<sup>c</sup>  
Wei Jiao,<sup>a</sup> Guolin Zhang,<sup>a</sup> Fei Wang,<sup>a</sup> Xiaoxia Lu,<sup>\* a,c</sup> Xiaofeng Ma. <sup>\* a</sup>

<sup>a</sup>. Natural Product Research Center, Chengdu Institute of Biology, Chinese Academy of Sciences,  
Chengdu 610041, China;

<sup>b</sup>. University of Chinese Academy of Sciences, Beijing 100049, China.

<sup>c</sup>. NMPA Key Laboratory for Quality Monitoring and Evaluation of Traditional Chinese  
Medicine (Chinese Materia Medica)

\*Correspondence Authors:

Xiaofeng Ma, Natural Product Research Center, Chengdu Institute of Biology, Chinese  
Academy of Sciences, Chengdu 610041, China, E-mail: ([maxf@cib.ac.cn](mailto:maxf@cib.ac.cn))

Xiaoxia Lu, Natural Product Research Center, Chengdu Institute of Biology, Chinese  
Academy of Sciences, Chengdu 610041, China, E-mail: ([luxx@cib.ac.cn](mailto:luxx@cib.ac.cn))

---

## content

|                                                                                                                           |    |
|---------------------------------------------------------------------------------------------------------------------------|----|
| SYNTHESIS OF 2-METHOXY-5-(3-(3,4,5-TRIMETHOXYPHENYL)PROPYL)PHENOL 4 .....                                                 | 4  |
| SYNTHESIS OF COMPOUND 5 AND 14 .....                                                                                      | 6  |
| SYNTHESIS OF COMPOUND 6 AND 7 .....                                                                                       | 6  |
| FIGURE S1. IC <sub>50</sub> VALUES OF THE ERIANIN ANALOGUES 1, 2, 3, 4 AND 6 ON CELL<br>GROWTH INHIBITION IN HCCLM3 ..... | 7  |
| FIGURE S2 COMPOUND 34 AND HUMAN PC (PDB ID:3BG3) BINDING MODES .....                                                      | 8  |
| FIGURE S3 COMPOUND 35 AND HUMAN PC (PDB ID:3BG3) BINDING MODES .....                                                      | 9  |
| FIGURE S4 ERIANIN AND HUMAN PC (PDB ID:3BG3) BINDING MODES .....                                                          | 10 |
| FIGURE S5. <sup>1</sup> H NMR OF COMPOUND 4 .....                                                                         | 11 |
| FIGURE S6. <sup>13</sup> C NMR OF COMPOUND 4 .....                                                                        | 12 |
| FIGURE S7. <sup>1</sup> H NMR OF COMPOUND 14 .....                                                                        | 13 |
| FIGURE S8. <sup>13</sup> C NMR OF COMPOUND 14 .....                                                                       | 14 |
| FIGURE S9. <sup>13</sup> C NMR OF COMPOUND 5 .....                                                                        | 15 |
| FIGURE S10. <sup>13</sup> C NMR OF COMPOUND 5 .....                                                                       | 16 |
| FIGURE S11. <sup>1</sup> H NMR OF COMPOUND 6 .....                                                                        | 17 |
| FIGURE S12. <sup>13</sup> C NMR OF COMPOUND 6 .....                                                                       | 18 |
| FIGURE S13. <sup>1</sup> H NMR OF COMPOUND 7 .....                                                                        | 19 |
| FIGURE S14. <sup>13</sup> C NMR OF COMPOUND 7 .....                                                                       | 20 |
| FIGURE S15. <sup>1</sup> H NMR OF COMPOUND 8 .....                                                                        | 21 |
| FIGURE S16. <sup>13</sup> C-NMR OF COMPOUND 8 .....                                                                       | 22 |
| FIGURE S17. <sup>1</sup> H NMR OF COMPOUND 9 .....                                                                        | 23 |
| FIGURE S18. <sup>13</sup> C-NMR OF COMPOUND 9 .....                                                                       | 24 |
| FIGURE S19. <sup>1</sup> H NMR OF COMPOUND 11 .....                                                                       | 25 |
| FIGURE S20. <sup>13</sup> C-NMR OF COMPOUND 11 .....                                                                      | 26 |
| FIGURE S21. <sup>1</sup> H NMR OF COMPOUND 12 .....                                                                       | 27 |
| FIGURE S22. <sup>13</sup> C-NMR OF COMPOUND 12 .....                                                                      | 28 |

---

|                                                      |    |
|------------------------------------------------------|----|
| FIGURE S23. <sup>1</sup> H NMR OF COMPOUND 13 .....  | 29 |
| FIGURE S24. <sup>13</sup> C-NMR OF COMPOUND 13 ..... | 30 |
| FIGURE S25. <sup>1</sup> H NMR OF COMPOUND 15 .....  | 31 |
| FIGURE S26. <sup>13</sup> C-NMR OF COMPOUND 15 ..... | 32 |
| FIGURE S27. <sup>1</sup> H NMR OF COMPOUND 16 .....  | 33 |
| FIGURE S28. <sup>13</sup> C-NMR OF COMPOUND 16 ..... | 34 |
| FIGURE S29. <sup>1</sup> H NMR OF COMPOUND 17 .....  | 35 |
| FIGURE S30. <sup>13</sup> C-NMR OF COMPOUND 17 ..... | 36 |
| FIGURE S31. <sup>1</sup> H NMR OF COMPOUND 18 .....  | 37 |
| FIGURE S32. <sup>13</sup> C-NMR OF COMPOUND 18 ..... | 38 |
| FIGURE S33. <sup>1</sup> H NMR OF COMPOUND 19 .....  | 39 |
| FIGURE S34. <sup>13</sup> C-NMR OF COMPOUND 19 ..... | 40 |
| FIGURE S35. <sup>1</sup> H NMR OF COMPOUND 20 .....  | 41 |
| FIGURE S36. <sup>13</sup> C-NMR OF COMPOUND 20 ..... | 42 |
| FIGURE S37. <sup>1</sup> H NMR OF COMPOUND 22 .....  | 43 |
| FIGURE S38. <sup>13</sup> C-NMR OF COMPOUND 22 ..... | 44 |
| FIGURE S39. <sup>1</sup> H NMR OF COMPOUND 23 .....  | 45 |
| FIGURE S40. <sup>13</sup> C-NMR OF COMPOUND 23 ..... | 46 |
| FIGURE S41. <sup>1</sup> H NMR OF COMPOUND 24 .....  | 47 |
| FIGURE S42. <sup>13</sup> C-NMR OF COMPOUND 24 ..... | 48 |
| FIGURE S43. <sup>1</sup> H NMR OF COMPOUND 25 .....  | 49 |
| FIGURE S44. <sup>13</sup> C-NMR OF COMPOUND 25 ..... | 50 |
| FIGURE S45. <sup>1</sup> H NMR OF COMPOUND 26 .....  | 51 |
| FIGURE S46. <sup>13</sup> C-NMR OF COMPOUND 26 ..... | 52 |
| FIGURE S47. <sup>1</sup> H NMR OF COMPOUND 27 .....  | 53 |
| FIGURE S48. <sup>13</sup> C-NMR OF COMPOUND 27 ..... | 54 |
| FIGURE S49. <sup>1</sup> H NMR OF COMPOUND 28 .....  | 55 |
| FIGURE S50. <sup>13</sup> C-NMR OF COMPOUND 28 ..... | 56 |

---

|                                                      |    |
|------------------------------------------------------|----|
| FIGURE S51. <sup>1</sup> H NMR OF COMPOUND 29 .....  | 57 |
| FIGURE S52. <sup>13</sup> C-NMR OF COMPOUND 29 ..... | 58 |
| FIGURE S53. <sup>1</sup> H NMR OF COMPOUND 30 .....  | 59 |
| FIGURE S54. <sup>13</sup> C-NMR OF COMPOUND 30 ..... | 60 |
| FIGURE S55. <sup>1</sup> H NMR OF COMPOUND 31 .....  | 61 |
| FIGURE S56. <sup>13</sup> C-NMR OF COMPOUND 31 ..... | 62 |
| FIGURE S57. <sup>1</sup> H NMR OF COMPOUND 32 .....  | 63 |
| FIGURE S58. <sup>13</sup> C-NMR OF COMPOUND 32 ..... | 64 |
| FIGURE S59. <sup>1</sup> H NMR OF COMPOUND 33 .....  | 65 |
| FIGURE S60. <sup>13</sup> C-NMR OF COMPOUND 33 ..... | 66 |
| FIGURE S61. <sup>1</sup> H NMR OF COMPOUND 34 .....  | 67 |
| FIGURE S62. <sup>13</sup> C-NMR OF COMPOUND 34 ..... | 68 |
| FIGURE S63. <sup>1</sup> H NMR OF COMPOUND 35 .....  | 70 |
| FIGURE S64. <sup>13</sup> C-NMR OF COMPOUND 35 ..... | 71 |
| FIGURE S65. <sup>1</sup> H NMR OF COMPOUND 36 .....  | 71 |
| FIGURE S66. <sup>13</sup> C-NMR OF COMPOUND 36 ..... | 72 |
| FIGURE S67. <sup>1</sup> H NMR OF COMPOUND 37 .....  | 73 |
| FIGURE S68. <sup>13</sup> C-NMR OF COMPOUND 37 ..... | 74 |
| FIGURE S70. <sup>13</sup> C-NMR OF COMPOUND 38 ..... | 76 |
| FIGURE S71. <sup>1</sup> H NMR OF COMPOUND 39 .....  | 77 |
| FIGURE S72. <sup>13</sup> C-NMR OF COMPOUND 39 ..... | 78 |
| FIGURE S73. <sup>1</sup> H NMR OF COMPOUND 41 .....  | 79 |
| FIGURE S74. <sup>13</sup> C-NMR OF COMPOUND 41 ..... | 80 |
| FIGURE S75. <sup>1</sup> H NMR OF COMPOUND 42 .....  | 81 |
| FIGURE S76. <sup>13</sup> C-NMR OF COMPOUND 42 ..... | 82 |
| FIGURE S77. <sup>1</sup> H NMR OF COMPOUND 43 .....  | 83 |
| FIGURE S78. <sup>13</sup> C-NMR OF COMPOUND 43 ..... | 84 |
| FIGURE S79. <sup>1</sup> H NMR OF COMPOUND 44 .....  | 85 |

---

|                                                       |    |
|-------------------------------------------------------|----|
| FIGURE S80. $^{13}\text{C}$ -NMR OF COMPOUND 44 ..... | 86 |
| FIGURE S81. $^1\text{H}$ NMR OF COMPOUND 45 .....     | 87 |
| FIGURE S82. $^{13}\text{C}$ -NMR OF COMPOUND 45 ..... | 88 |
| FIGURE S83. $^1\text{H}$ NMR OF COMPOUND 46 .....     | 89 |
| FIGURE S84. $^{13}\text{C}$ -NMR OF COMPOUND 46 ..... | 90 |
| FIGURE S85. $^1\text{H}$ NMR OF COMPOUND 47 .....     | 91 |
| FIGURE S86. $^{13}\text{C}$ -NMR OF COMPOUND 47 ..... | 92 |
| REFERENCES .....                                      | 93 |

---

#### Synthesis of 2-methoxy-5-(3-(3,4,5-trimethoxyphenyl)propyl)phenol 4<sup>1</sup>

The obtained ketone **3** (150.0 mg, 0.43 mmol) was dissolved in acetic acid (2 mL), 10% palladium on carbon (25.2 mg) was added to the solution. The reaction vessel was evacuated and backfilled with hydrogenation (H<sub>2</sub>) for 3 times. The mixture was stirred at 25 °C for 12 h and then filtration through celite gave a filtrate. This filtrate was evaporated to oil, which was purified by chromatography on silica gel (ethyl acetate: hexane = 1: 10) to give **15** (130.6 mg, 91.4%). <sup>1</sup>H NMR (400 MHz, CDCl<sub>3</sub>) δ 6.77 (d, *J* = 2.24 Hz, 1H), 6.76 (d, *J* = 8.36 Hz, 1H), 6.67 (dd, *J* = 2.00, 8.20 Hz, 1H), 6.39 (s, 2 H), 3.87 (s, 3H), 3.85 (s, 3 H), 3.83 (s, 3H), 2.61 (t, *J* = 7.76 Hz, 4H), 1.89 - 1.95 (m, 2 H); <sup>13</sup>C NMR (100 MHz, CDCl<sub>3</sub>) δ 153.07, 145.50, 144.78, 138.17, 136.05, 135.54, 119.75, 114.71, 110.63, 105.33, 60.86, 56.07, 35.76, 34.82, 33.02.

#### Synthesis of compound 5<sup>2</sup> and 14<sup>3</sup>

The synthesis of compound **5** and **7** followed the synthesis procedure of compound **15** in scheme 3.

2-(3-hydroxy-4-methoxyphenyl)-1-(3,4,5-trimethoxyphenyl)ethan-1-one (**5**) <sup>1</sup>H NMR (400 MHz, CDCl<sub>3</sub>) δ 7.26 (s, 2H), 6.84 (d, *J* = 2.00 Hz, 1H), 6.81 (d, *J* = 8.20 Hz, 1H), 6.75 (dd, *J* = 2.00 Hz, 8.20 Hz, 1H), 5.64 (s, 1H), 4.14 (s, 2H), 3.40 (s, 3H), 3.88 (s, 6H), 3.85 (s, 3H); <sup>13</sup>C NMR (100 MHz, CDCl<sub>3</sub>) δ 196.61, 153.01, 145.82, 145.62, 142.57, 131.70, 127.97, 120.73, 115.54, 110.94, 106.32, 60.91, 56.26, 55.95, 45.03.

1-(4-hydroxy-3-methoxyphenyl)-2-(3,4,5-trimethoxyphenyl)ethan-1-one (**14**). <sup>1</sup>H NMR (400 MHz, CDCl<sub>3</sub>) δ 7.63 (dd, *J* = 1.92 Hz, 8.28 Hz, 1H), 7.57 (d, *J* = 1.92 Hz, 1H), 6.96 (d, *J* = 8.28 Hz, 1H), 6.48 (s, 2H), 6.13 (br s, 1H), 4.17 (s, 2H), 3.94 (s, 3H), 3.83 (s, 3 H), (s, 3H); <sup>13</sup>C NMR (100 MHz, CDCl<sub>3</sub>) δ 196.19, 153.32, 150.60, 146.77, 136.91, 130.57, 129.48, 124.07, 113.86, 110.33, 106.45, 60.82, 56.11, 56.03, 45.26, 29.69.

#### Synthesis of compound 6 and 7<sup>4</sup>

The synthesis of compound **6** and **7** followed the synthesis procedure of compound **8** and **9** in scheme 4. 2-methoxy-5-((methyl(3,4,5- trimethoxyphenyl)amino)methyl)-

phenol (**6**).  $^1\text{H}$  NMR (400 MHz,  $\text{CDCl}_3$ )  $\delta$  6.84 (s, 1H), 6.81 (d,  $J = 10.52$ , 1H), 6.76 (d,  $J = 8.04$ , 1H), 6.00 (s, 2H), 5.64 (s, 1H), 4.38 (s, 2H), 3.88 (s, 3H), 3.80 (s, 6H), 3.77 (s, 3H), 2.97 (s, 3H).  $^{13}\text{C}$  NMR (100 MHz,  $\text{CDCl}_3$ )  $\delta$  153.68, 145.79, 145.64, 118.41, 113.25, 110.70, 90.90, 61.09, 57.04, 56.01, 55.99, 38.97.

2-methoxy-5-(methyl(3,4,5-trimethoxybenzyl)amino)phenol (**7**).  $^1\text{H}$  NMR (400 MHz,  $\text{CDCl}_3$ ),  $\delta$  6.77 (d,  $J = 8.8\text{Hz}$ , 1H), 6.48 (d,  $J = 2.92\text{Hz}$ , 1H), 6.47 (s, 2H), 6.26 (dd,  $J = 2.92\text{Hz}$ , 8.8Hz, 1H), 5.63 (s, 1H), 4.34 (s, 2H), 3.83 (s, 3H), 3.82 (s, 3H), 3.80 (s, 6H), 2.90 (s, 3H),  $^{13}\text{C}$  NMR (100 MHz,  $\text{CDCl}_3$ )  $\delta$  153.40, 146.42, 145.92, 138.94, 136.76, 135.06, 112.27, 104.45, 103.70, 101.25, 60.85, 58.11, 56.78, 56.09, 38.96.

Figure S1.  $\text{IC}_{50}$  values of the erianin analogues 1, 2, 3, 4 and 6 on cell growth inhibition in HCCLM3

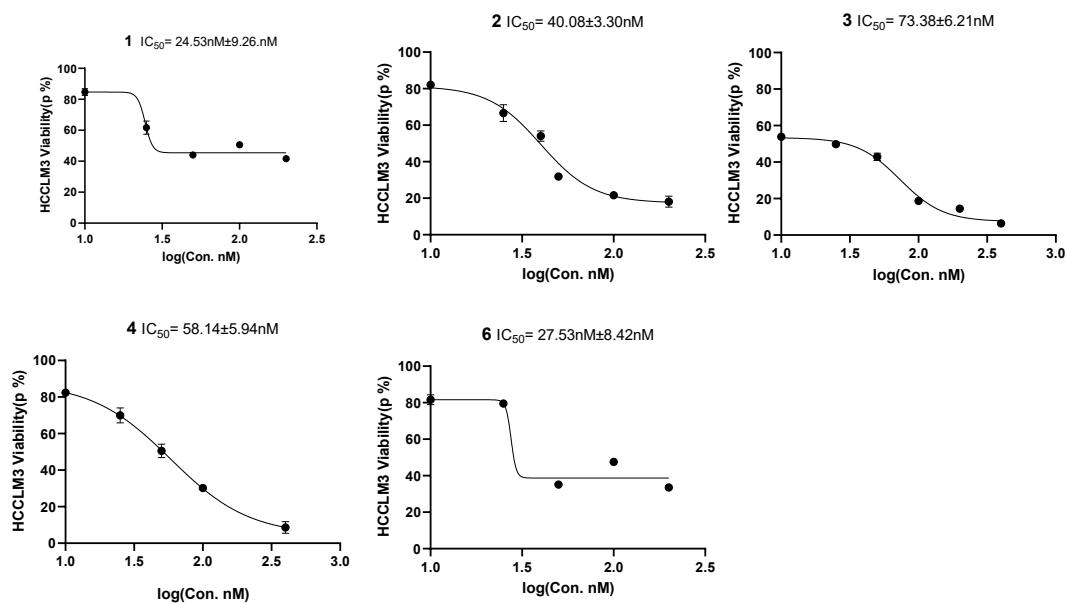

Figure S2 Compound 34 and human PC (PDB ID:3BG3) binding modes

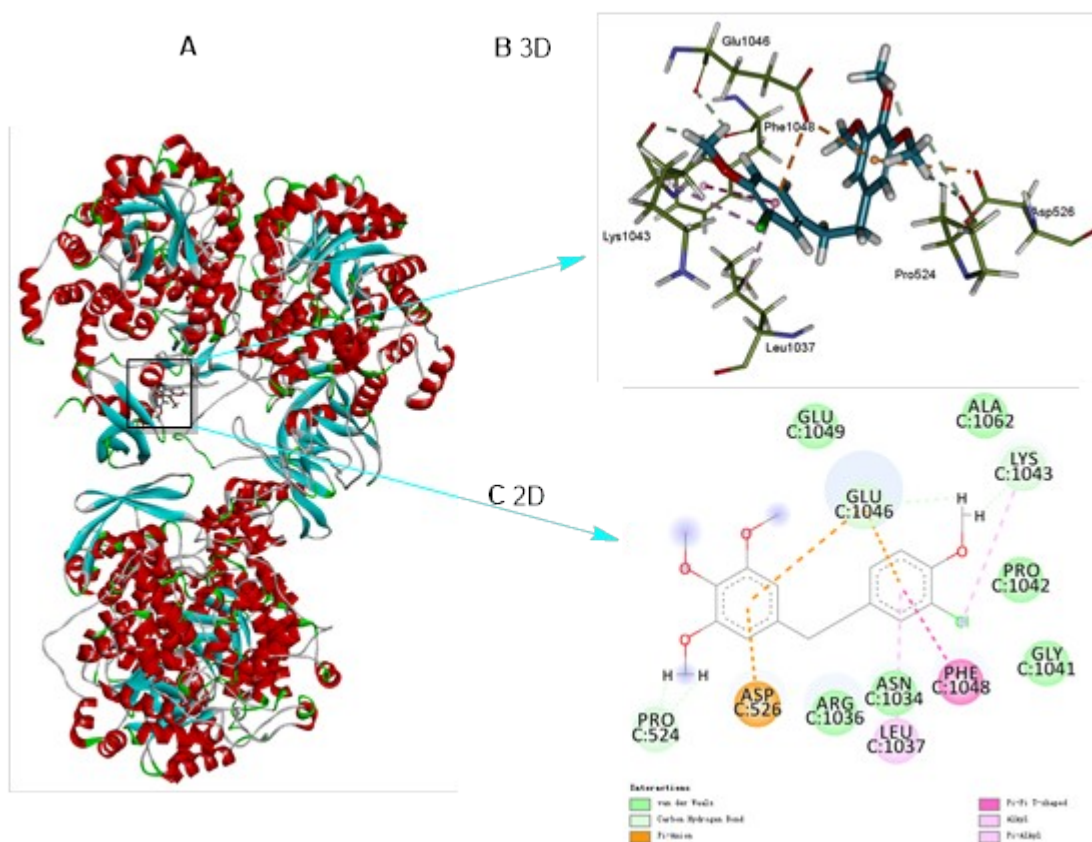

**Fig. S2** Binding conformations of **34** with human pyruvate carboxylase (PDB ID: 3BG3). Panel A: binding site of compound **34** in the 3BG3; panel B: binding 3D modes of compound **34** in the active site of 3BG; panel C, binding 2D modes of compound **34** the active site of 3BG3.

Figure S3 Compound 35 and human PC (PDB ID:3BG3) binding modes



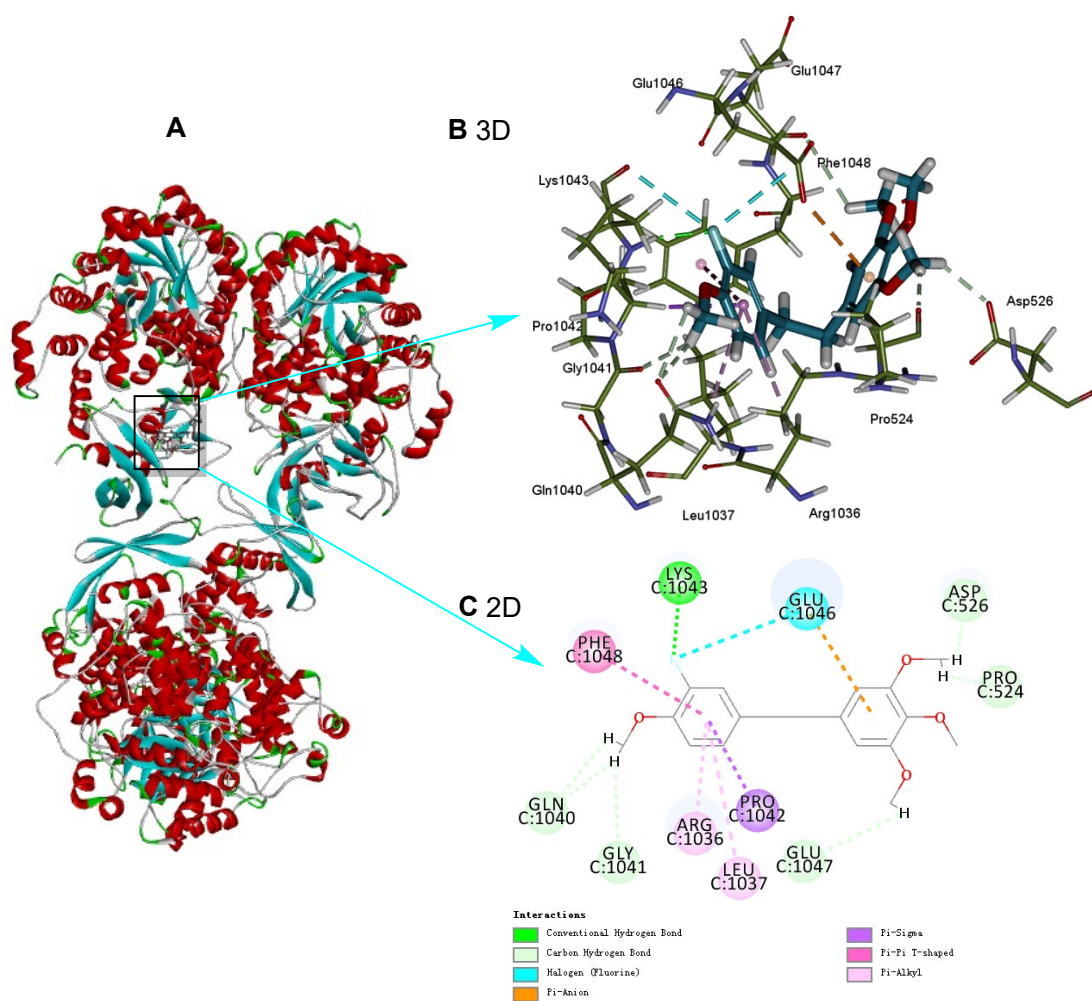

**Fig. S3** Binding conformations of **35** with human pyruvate carboxylase (PDB ID: 3BG3). Panel A: binding site of compound **35** in the 3BG3; panel B: binding 3D modes of compound **35** in the active site of 3BG; panel C, binding 2D modes of compound **35** the active site of 3BG3.

Figure S4 Erianin and human PC (PDB ID:3BG3) binding modes

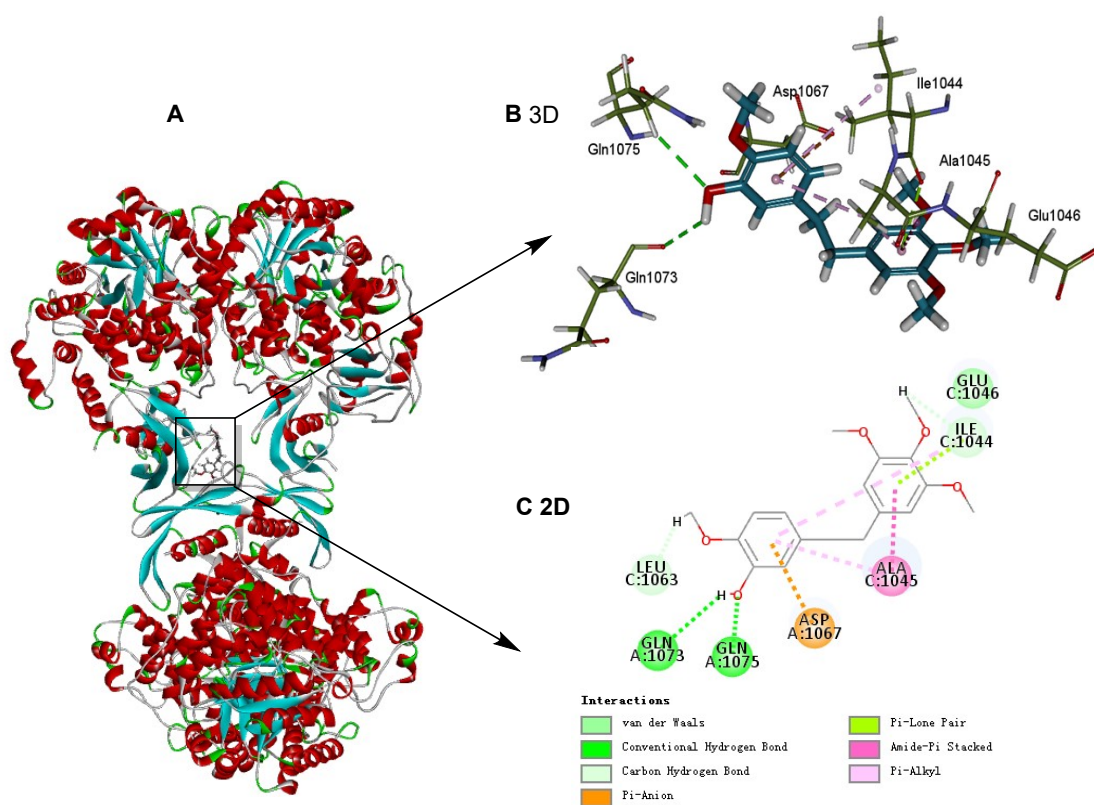

**Fig. S4** Binding conformations of erianin with human pyruvate carboxylase (PDB ID: 3BG3). Panel A: binding site of compound erianin in the 3BG3; panel B: binding 3D modes of compound erianin in the active site of 3BG; panel C, binding 2D modes of compound erianin the active site of 3BG3.

Figure S5. <sup>1</sup>H NMR of Compound 4

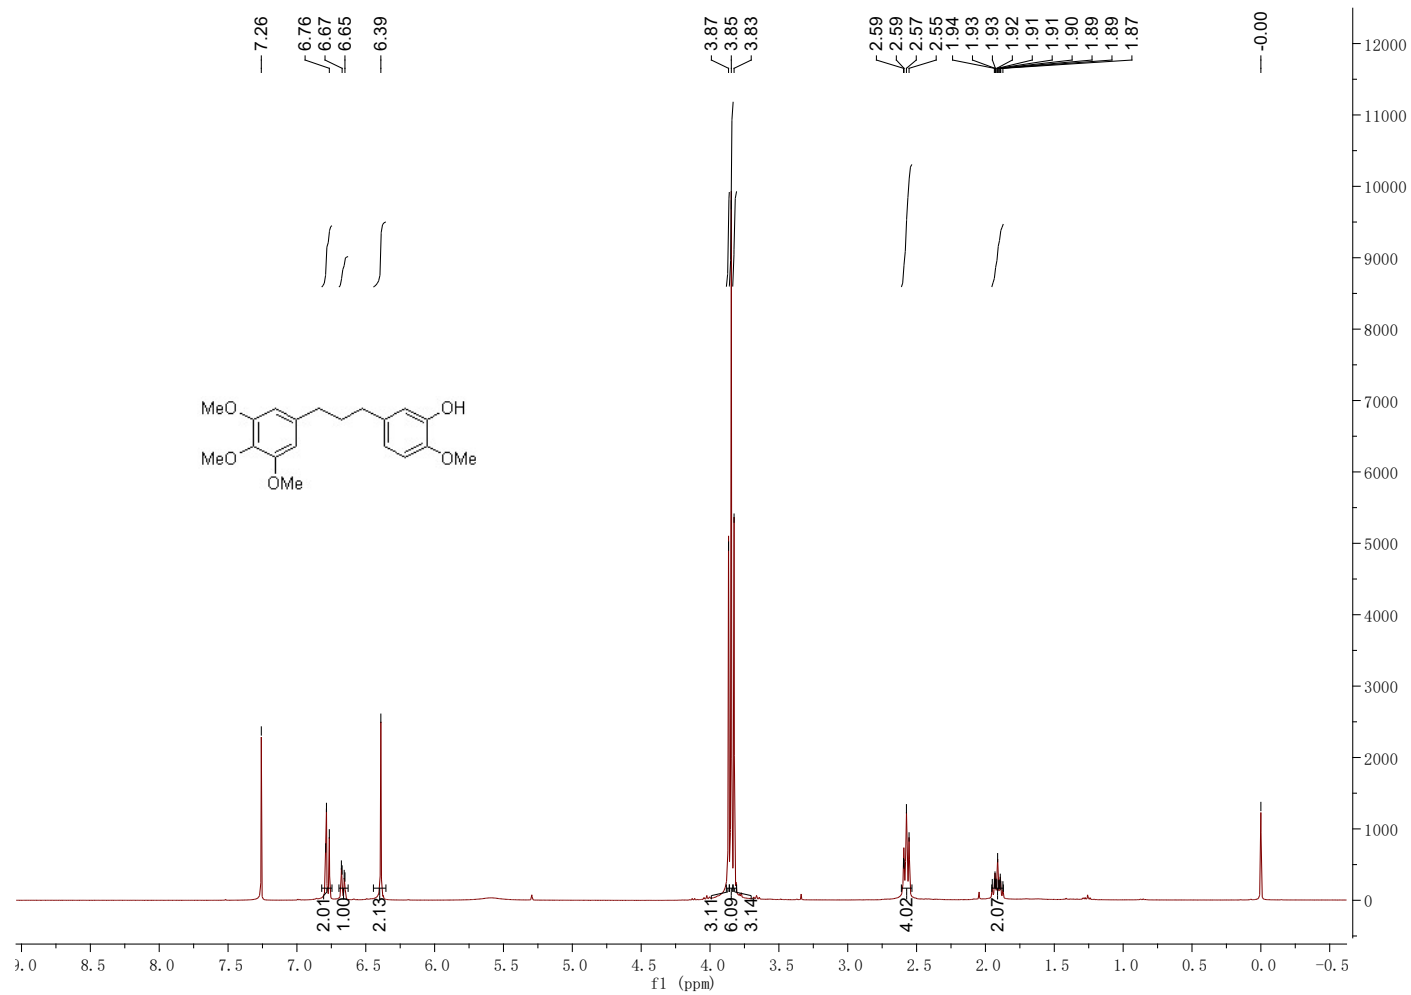

Figure S6.  $^{13}\text{C}$  NMR of Compound 4

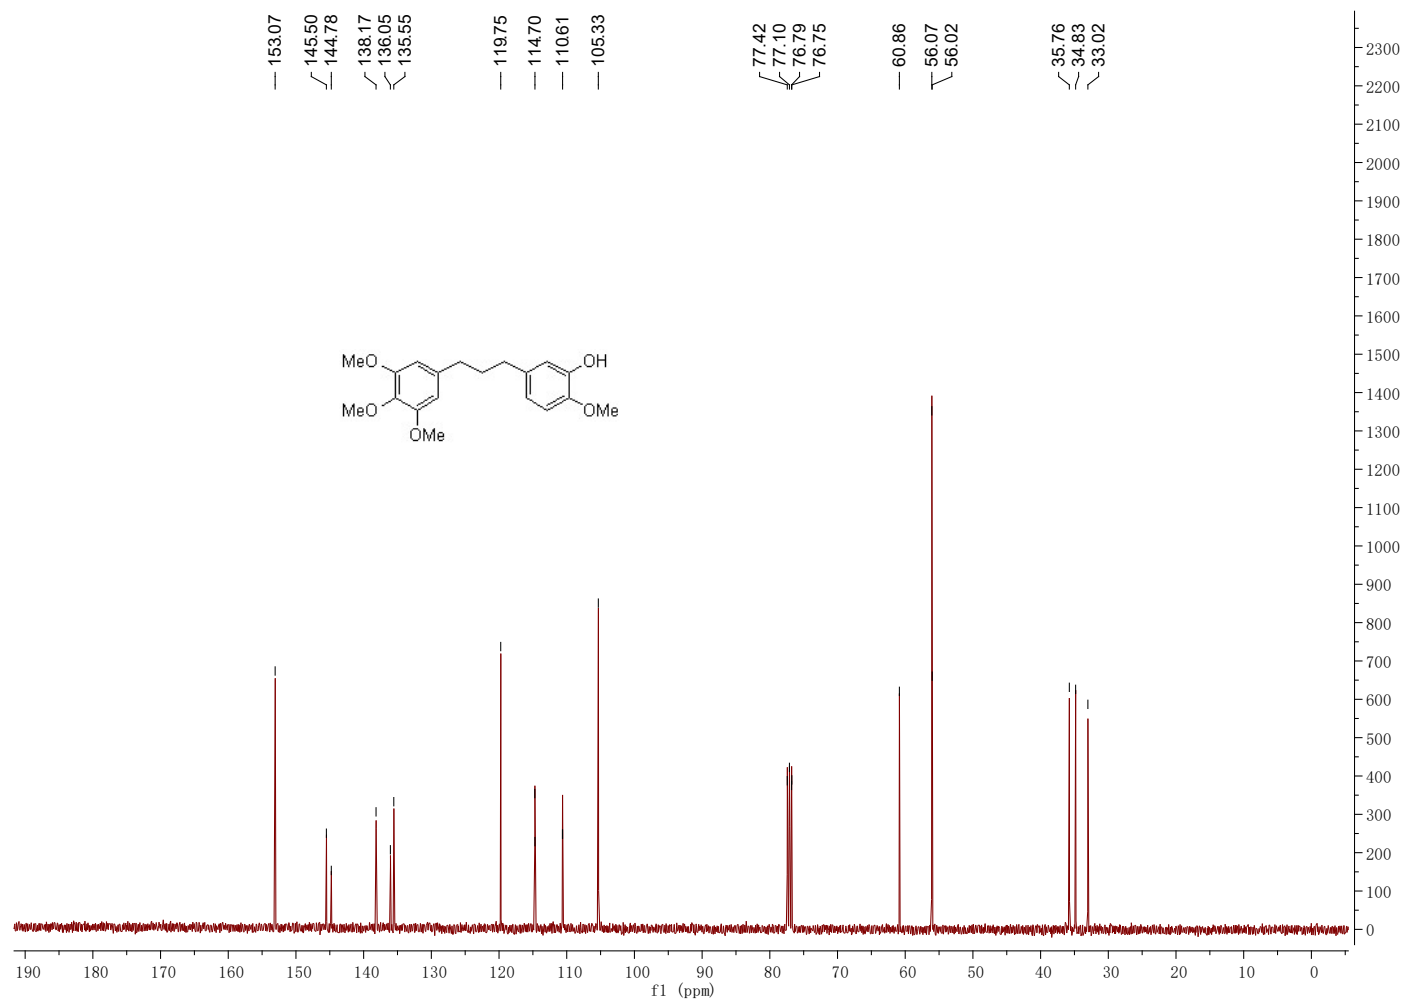

Figure S7. <sup>1</sup>H NMR of Compound 14

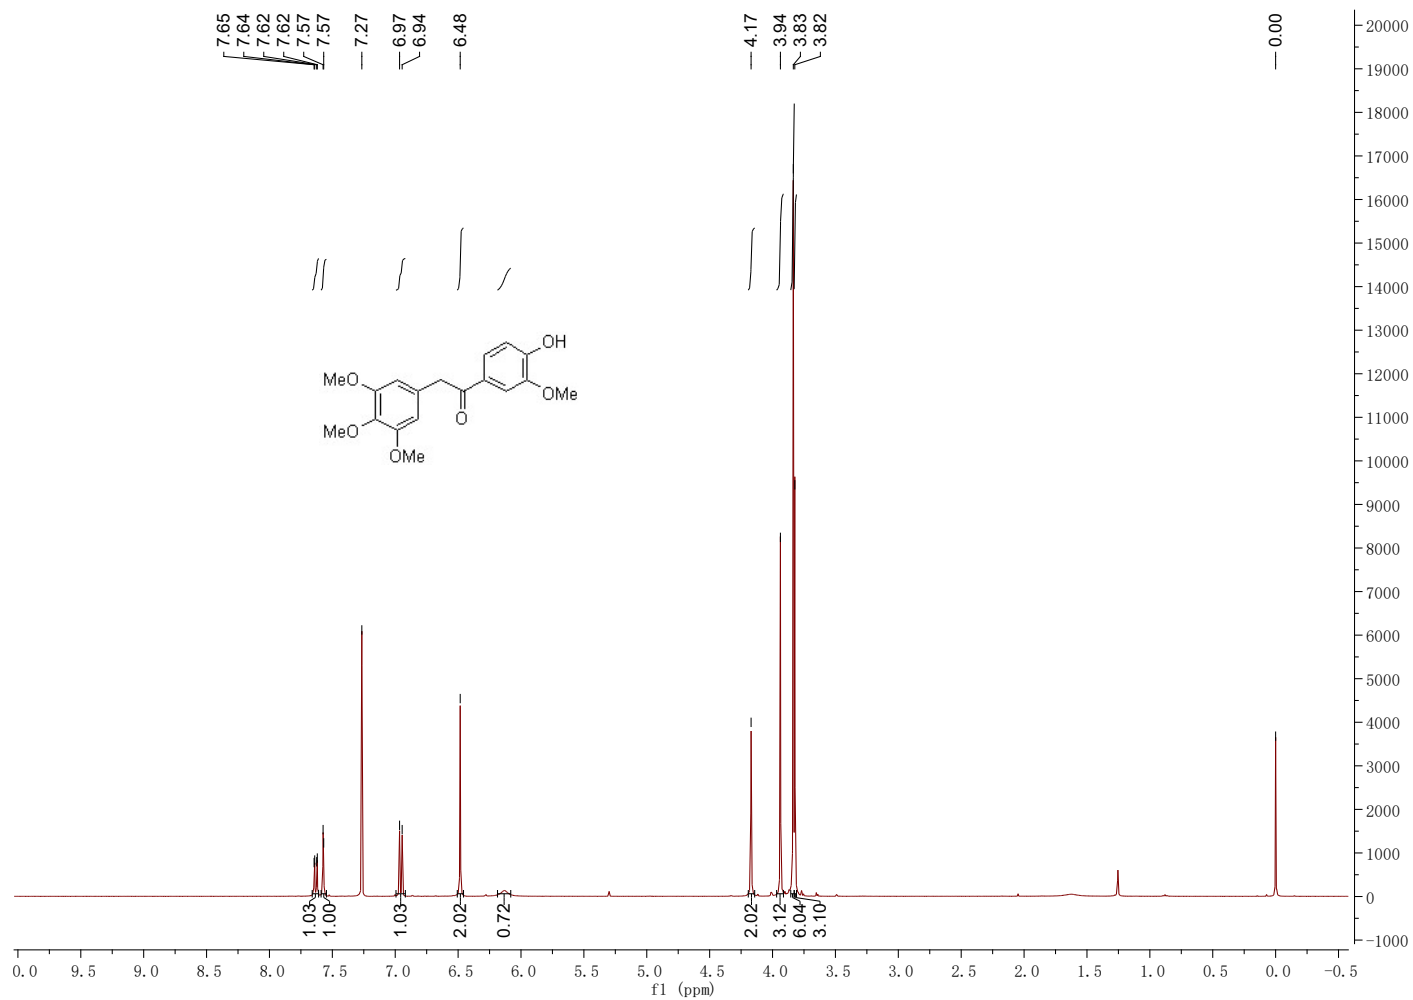

Figure S8.  $^{13}\text{C}$  NMR of Compound 14

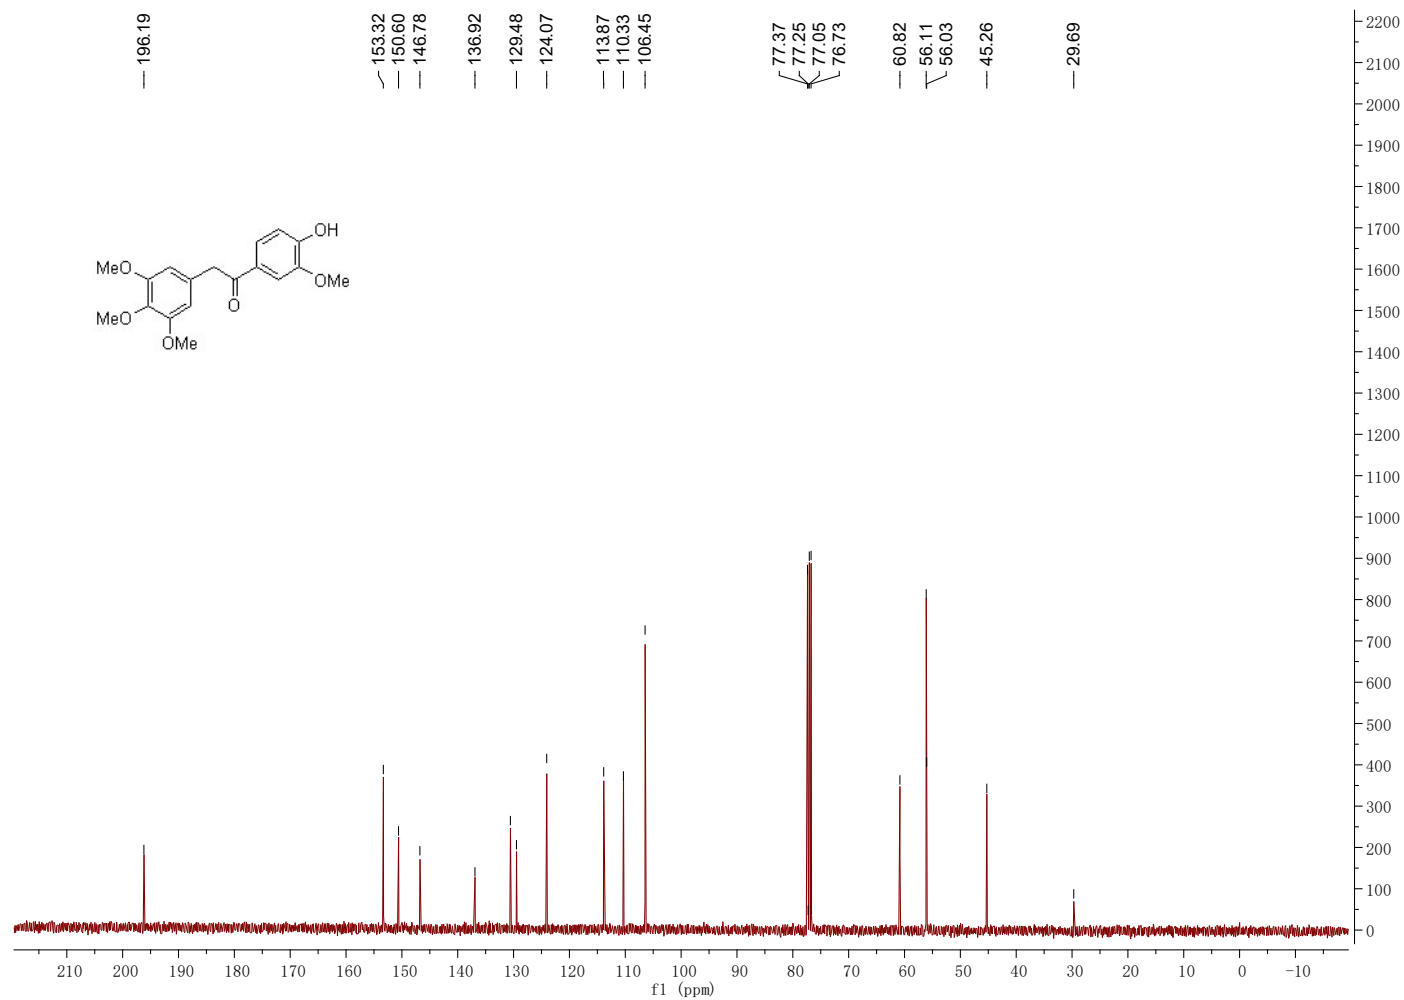

Figure S9.  $^{13}\text{C}$  NMR of Compound 5

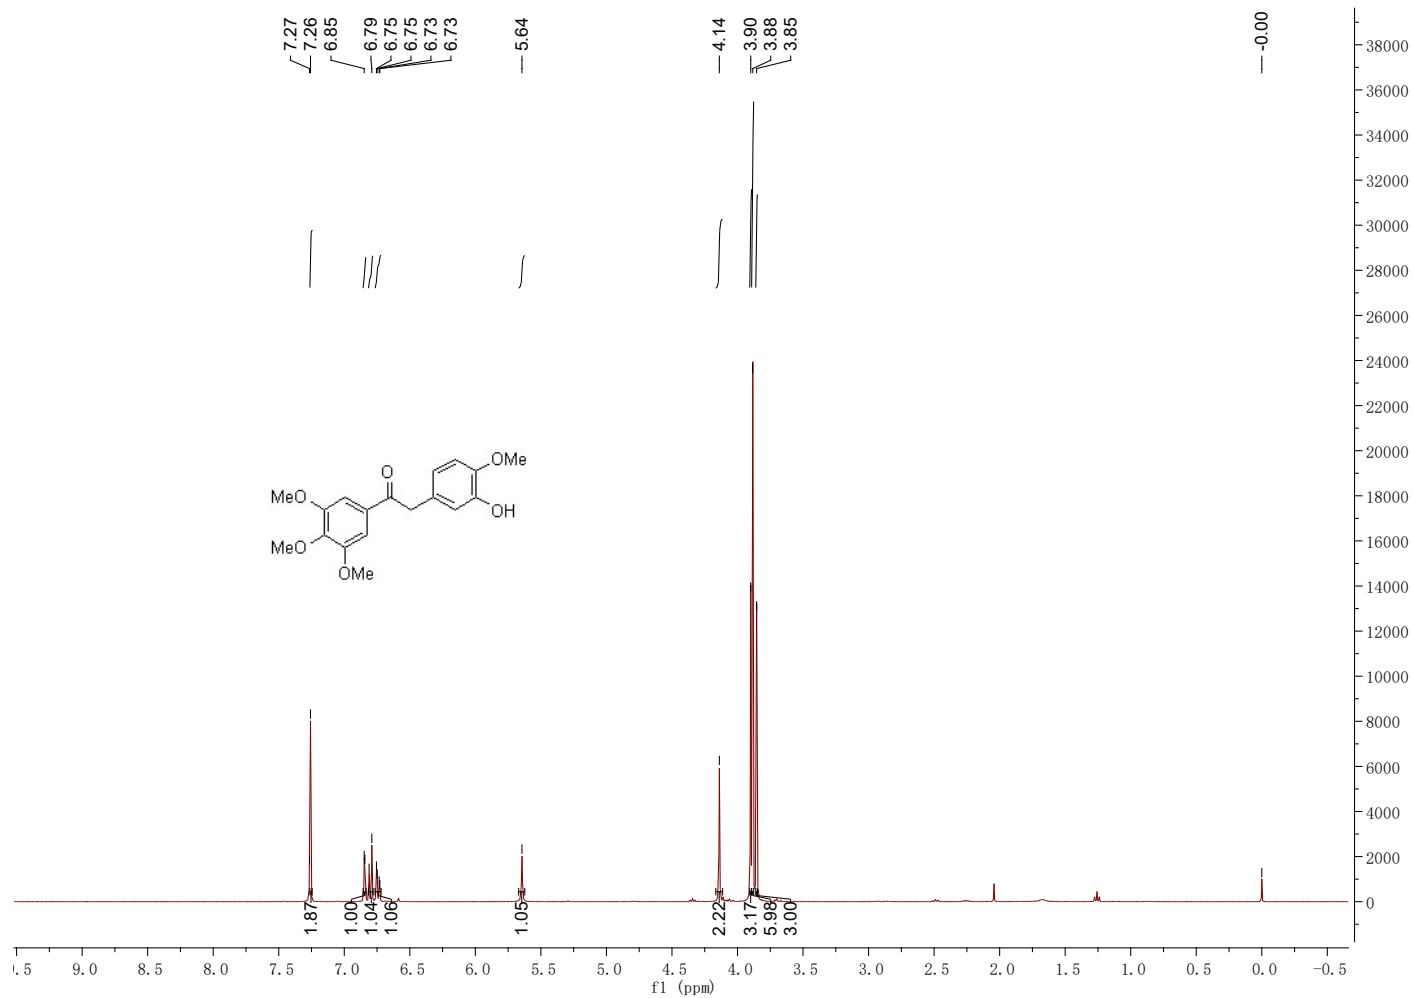

Figure S10.  $^{13}\text{C}$  NMR of Compound 5

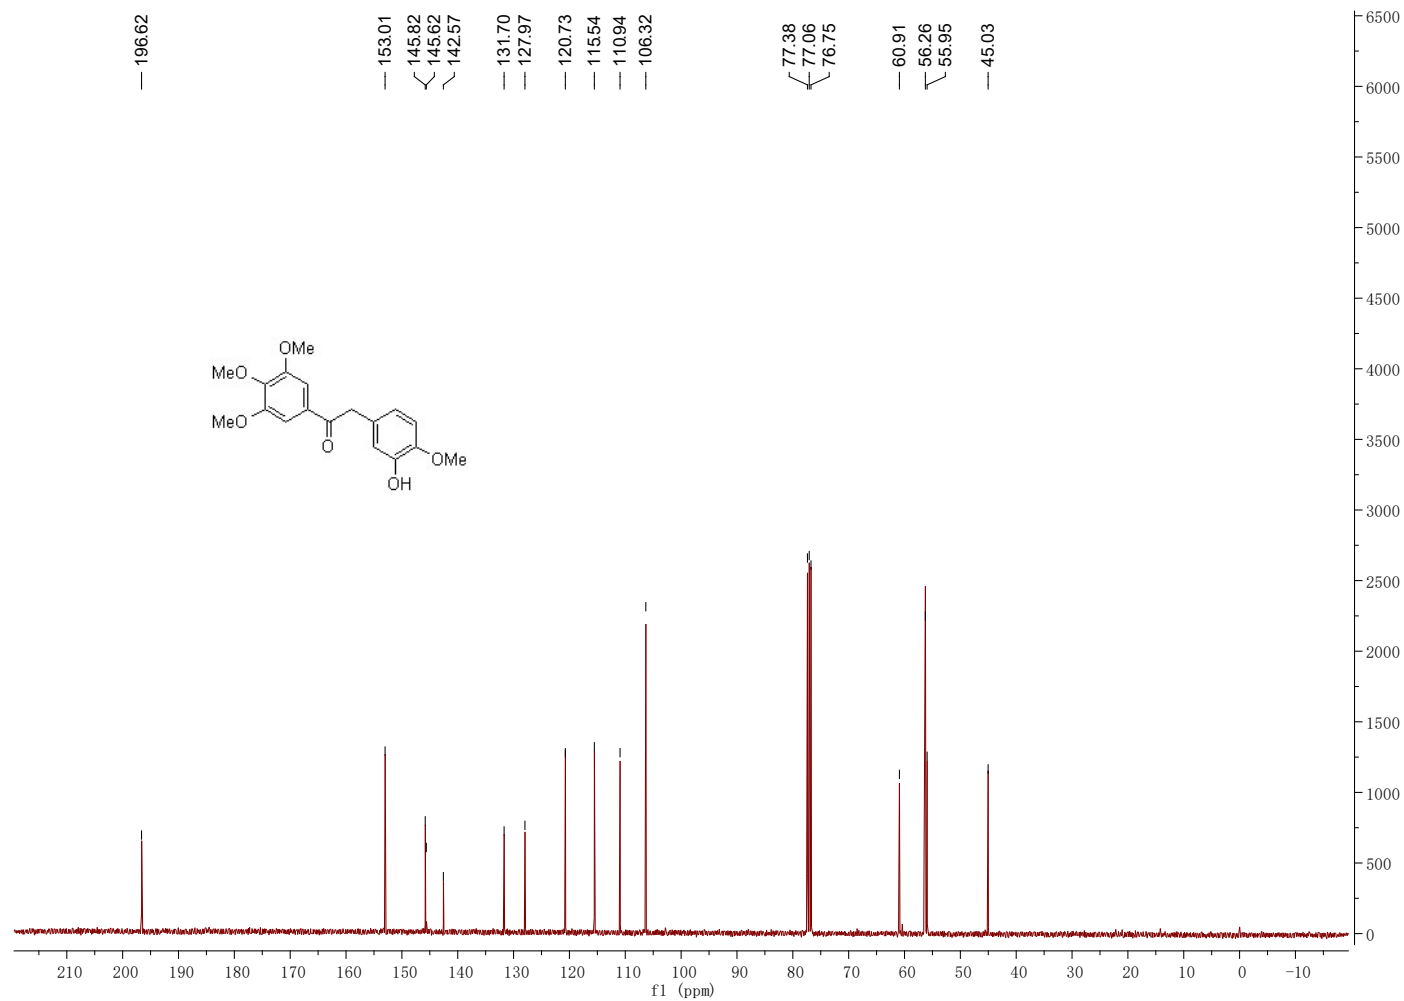



Figure S11. <sup>1</sup>H NMR of Compound 6

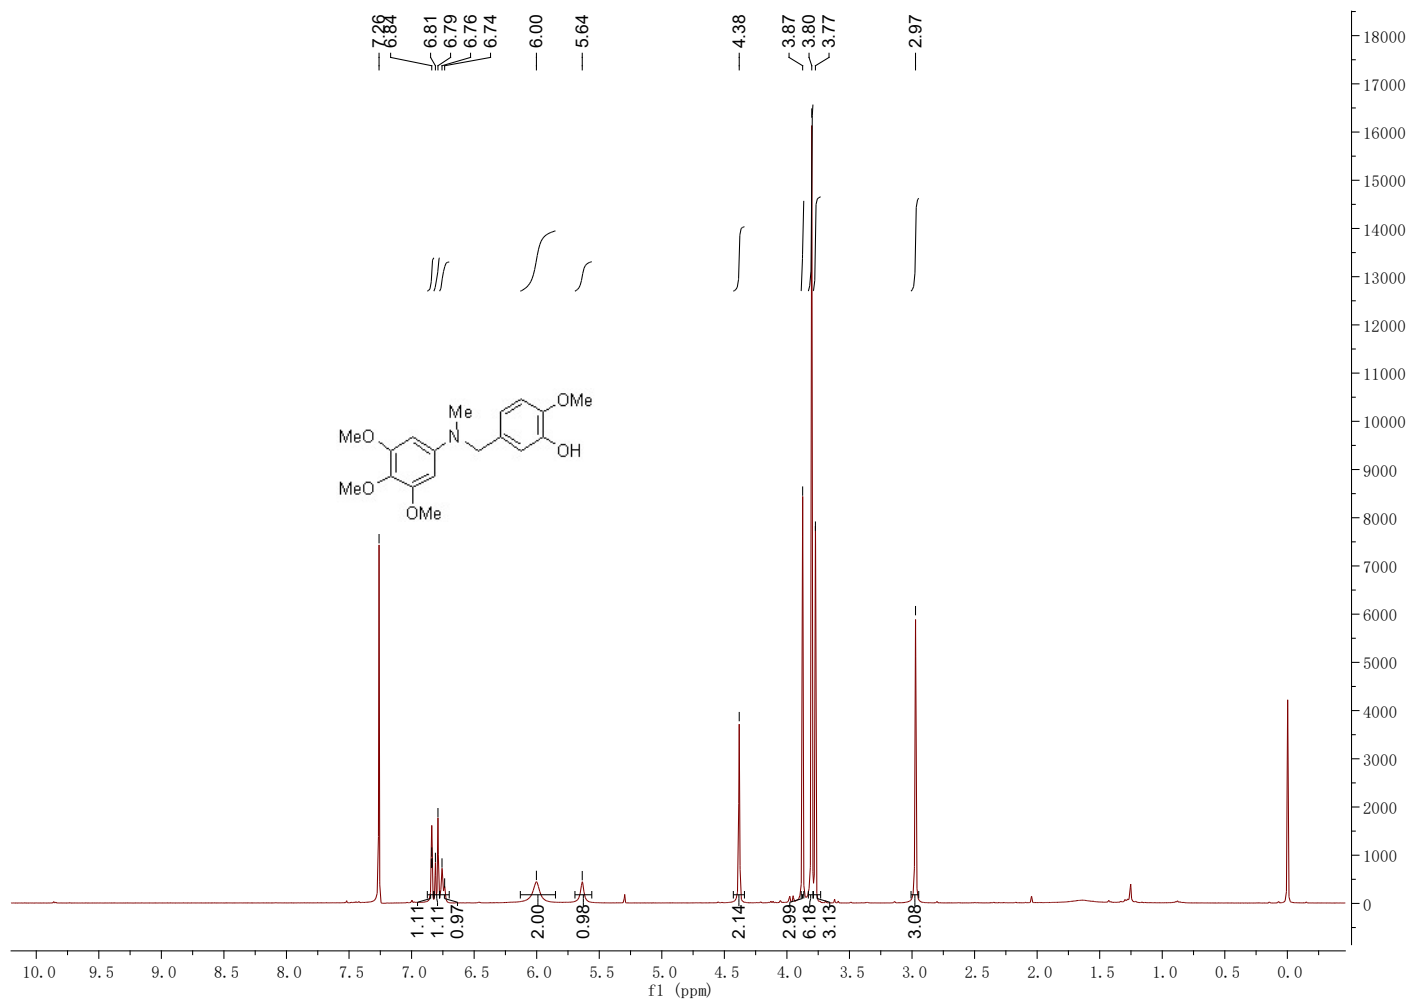

Figure S12.  $^{13}\text{C}$  NMR of Compound 6

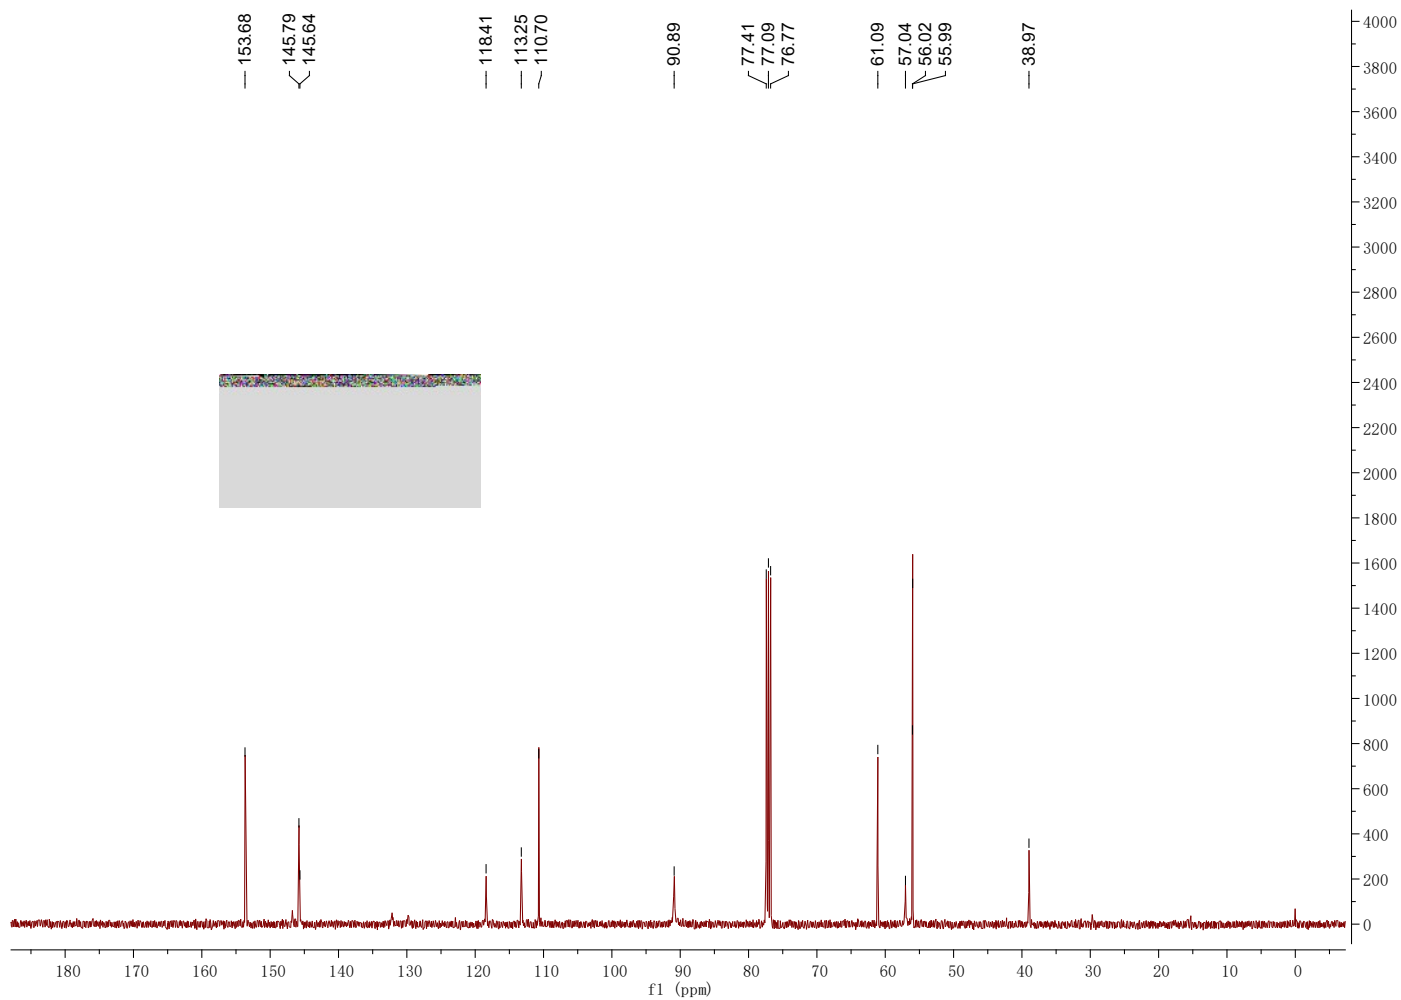

Figure S13. <sup>1</sup>H NMR of Compound 7

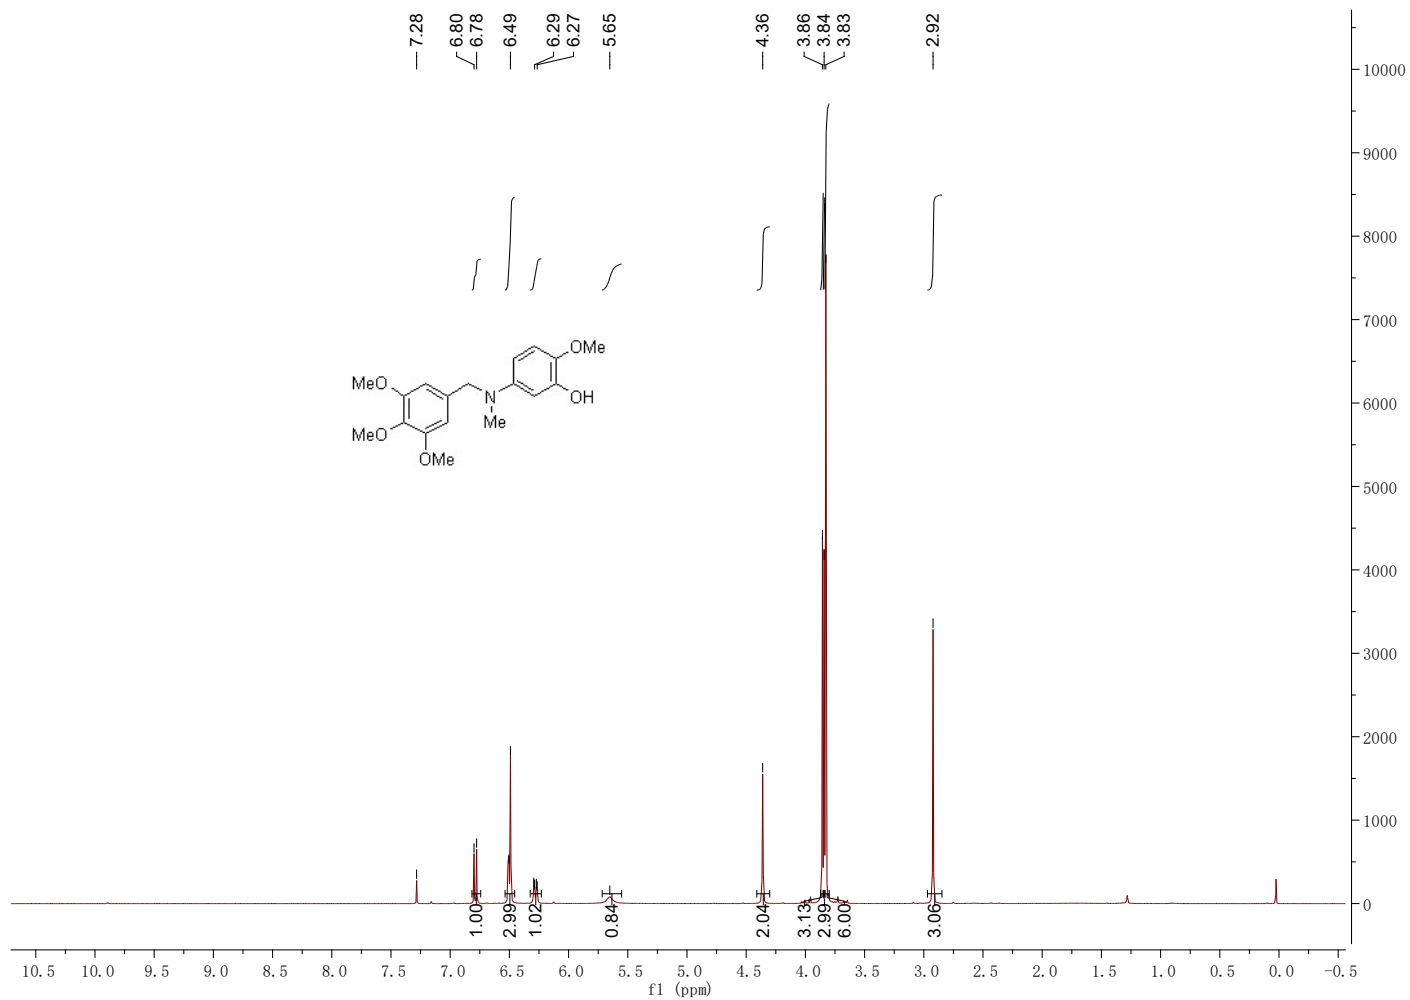

Figure S14.  $^{13}\text{C}$  NMR of Compound 7

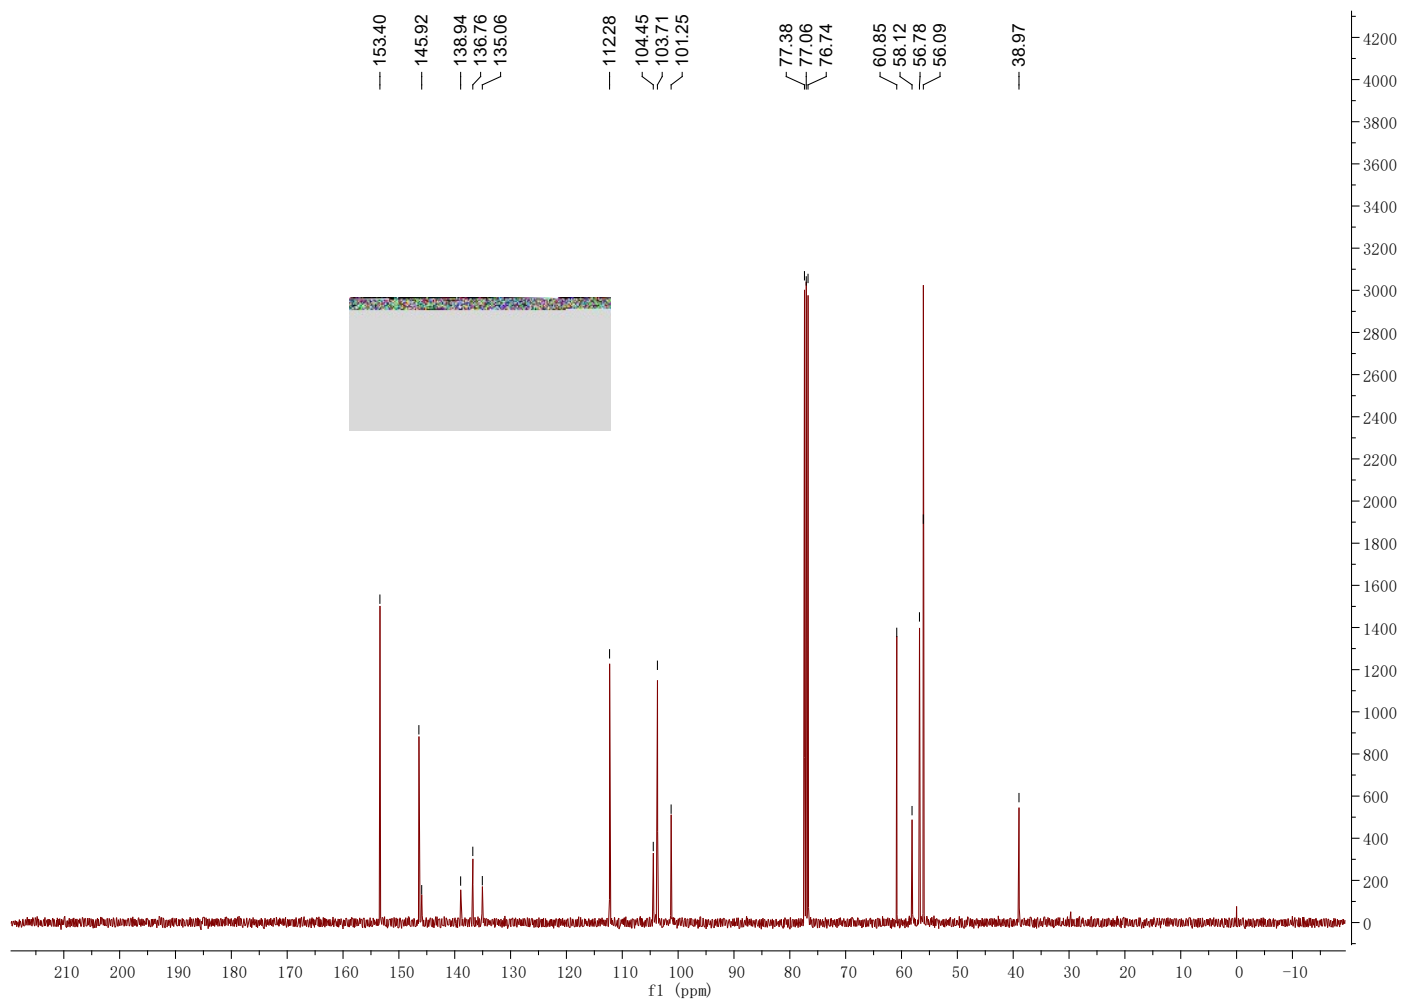

Figure S15. <sup>1</sup>H NMR of Compound 8

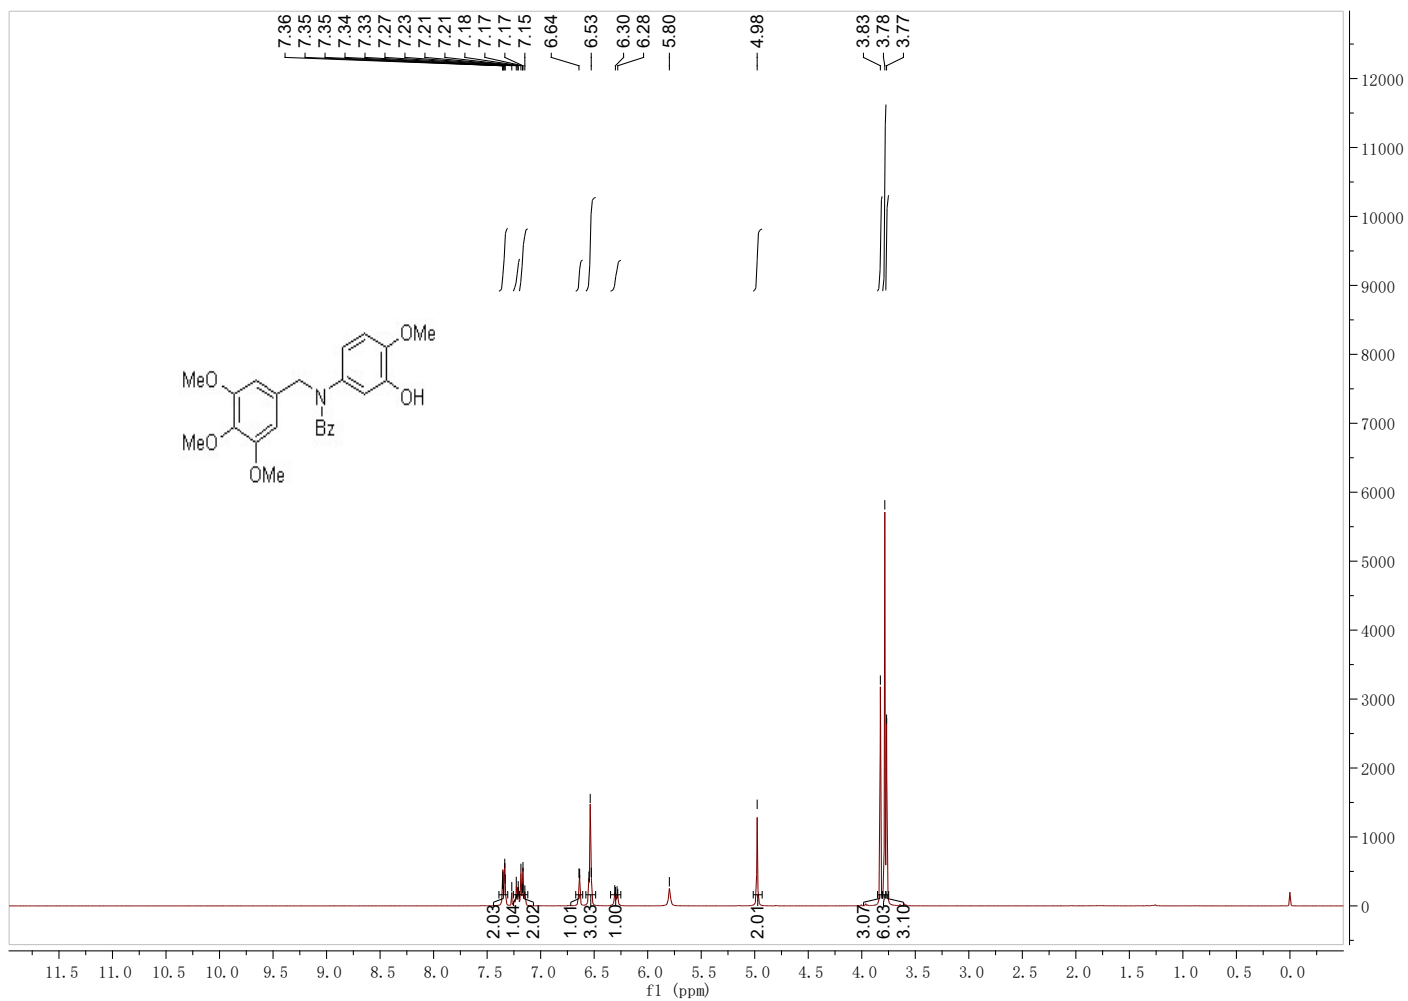

Figure S16. <sup>13</sup>C-NMR of Compound 8

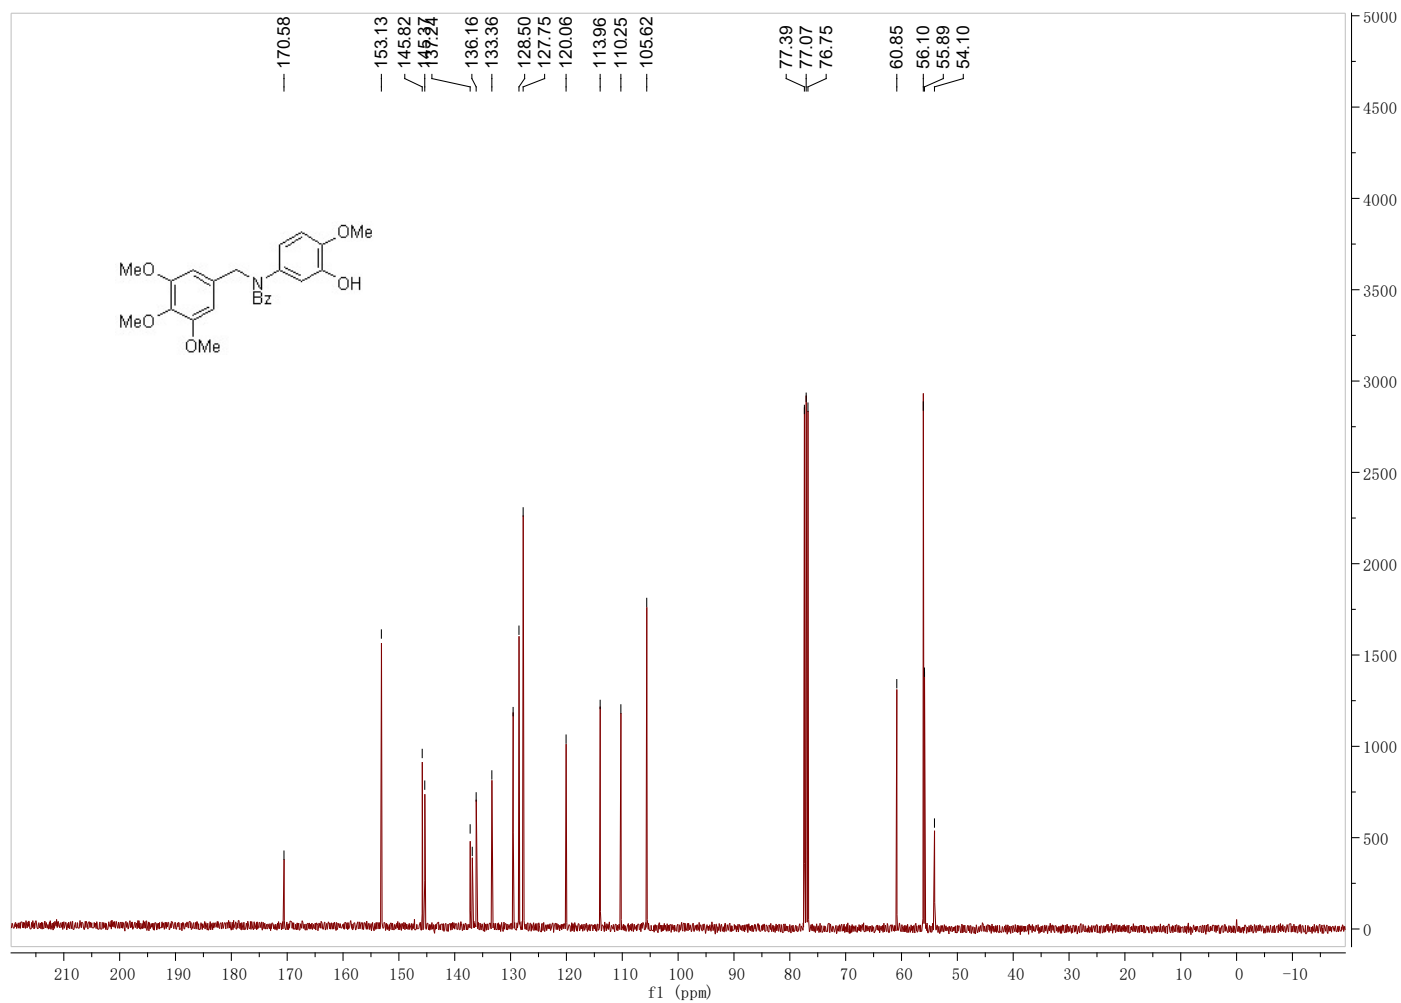

Figure S17. <sup>1</sup>H NMR of Compound 9

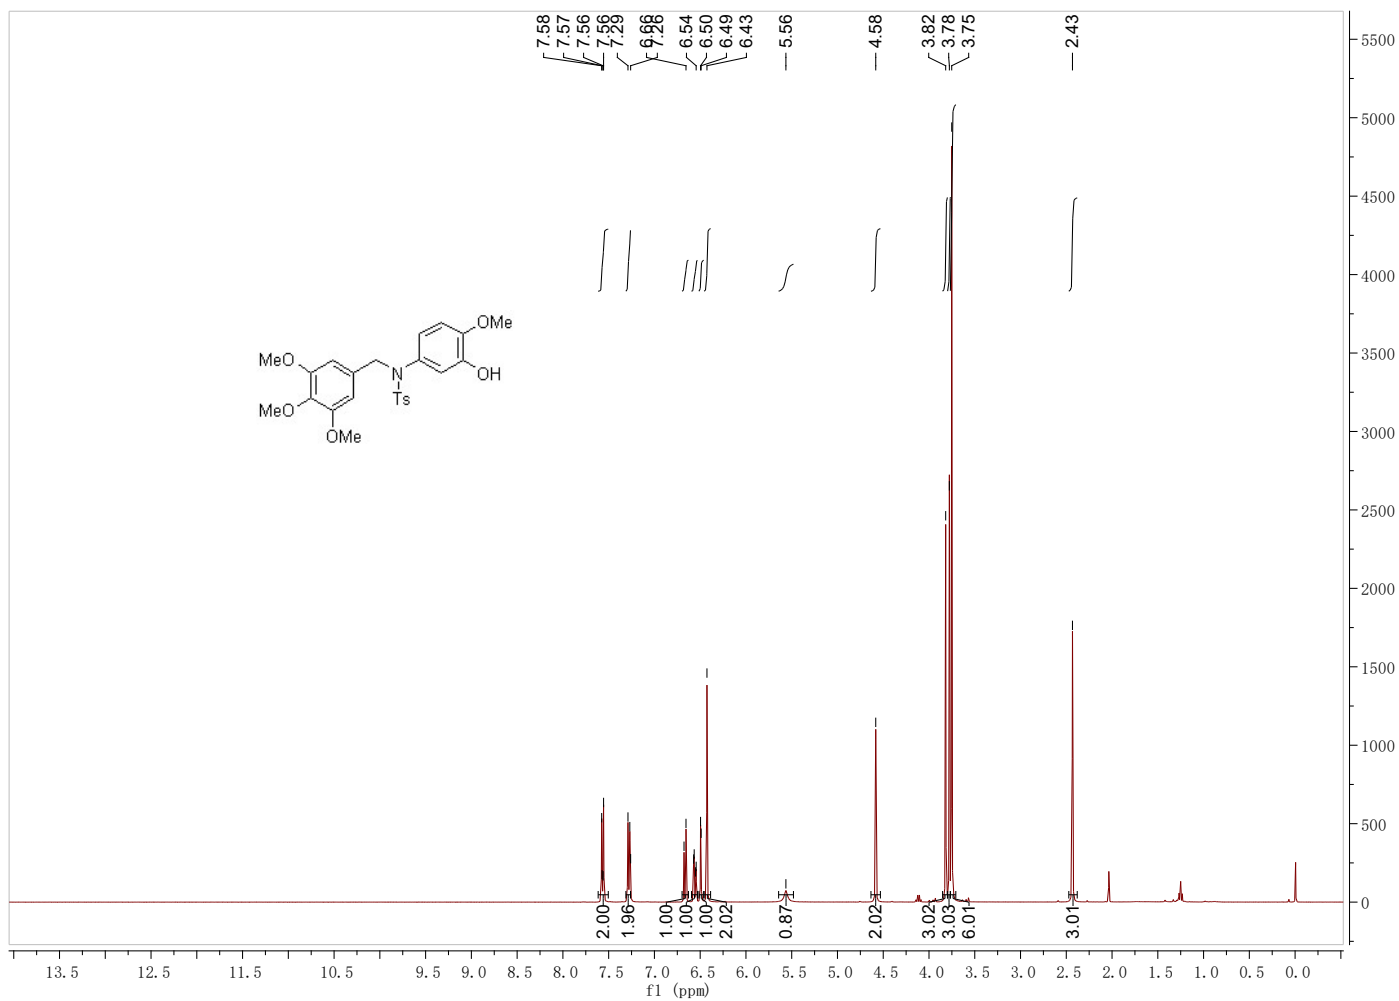

Figure S18.  $^{13}\text{C}$ -NMR of Compound 9

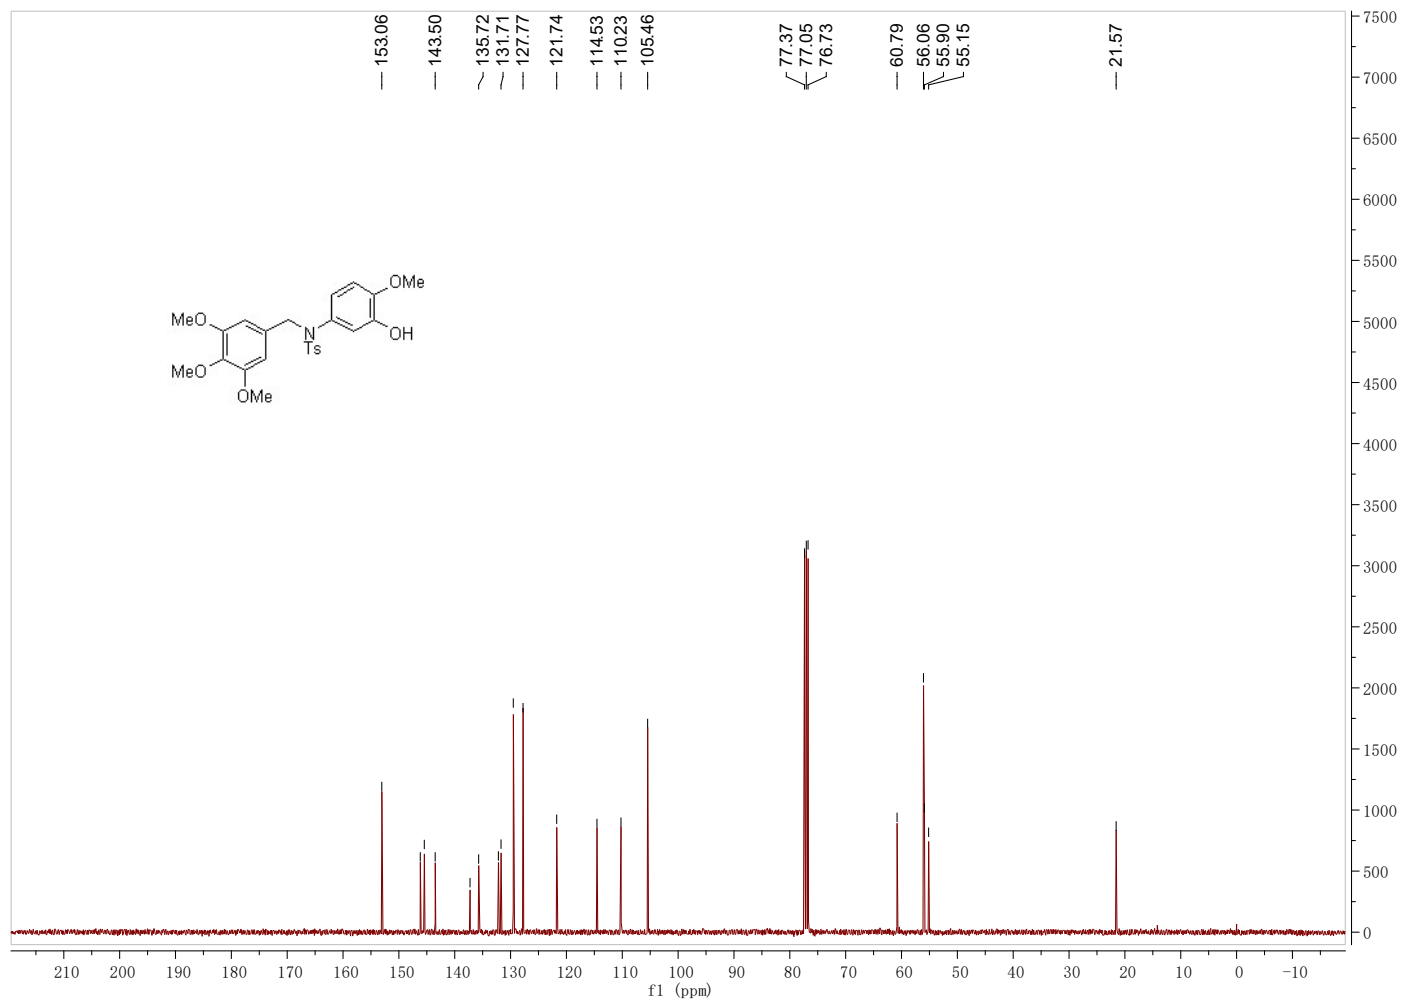



Figure S19. <sup>1</sup>H NMR of Compound 11

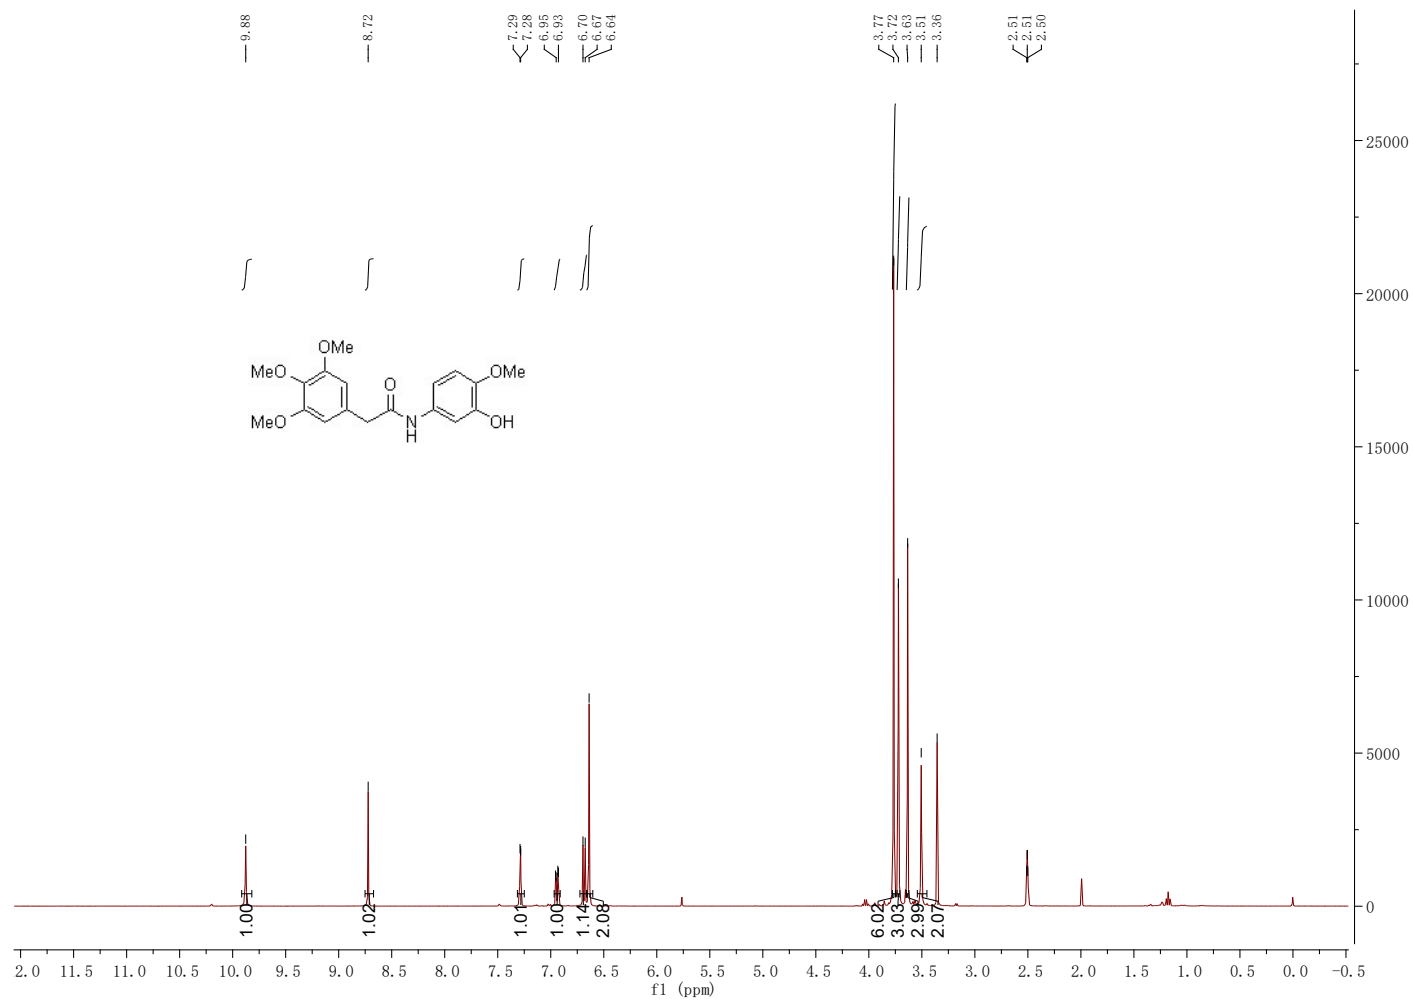

Figure S20.  $^{13}\text{C}$ -NMR of Compound 11

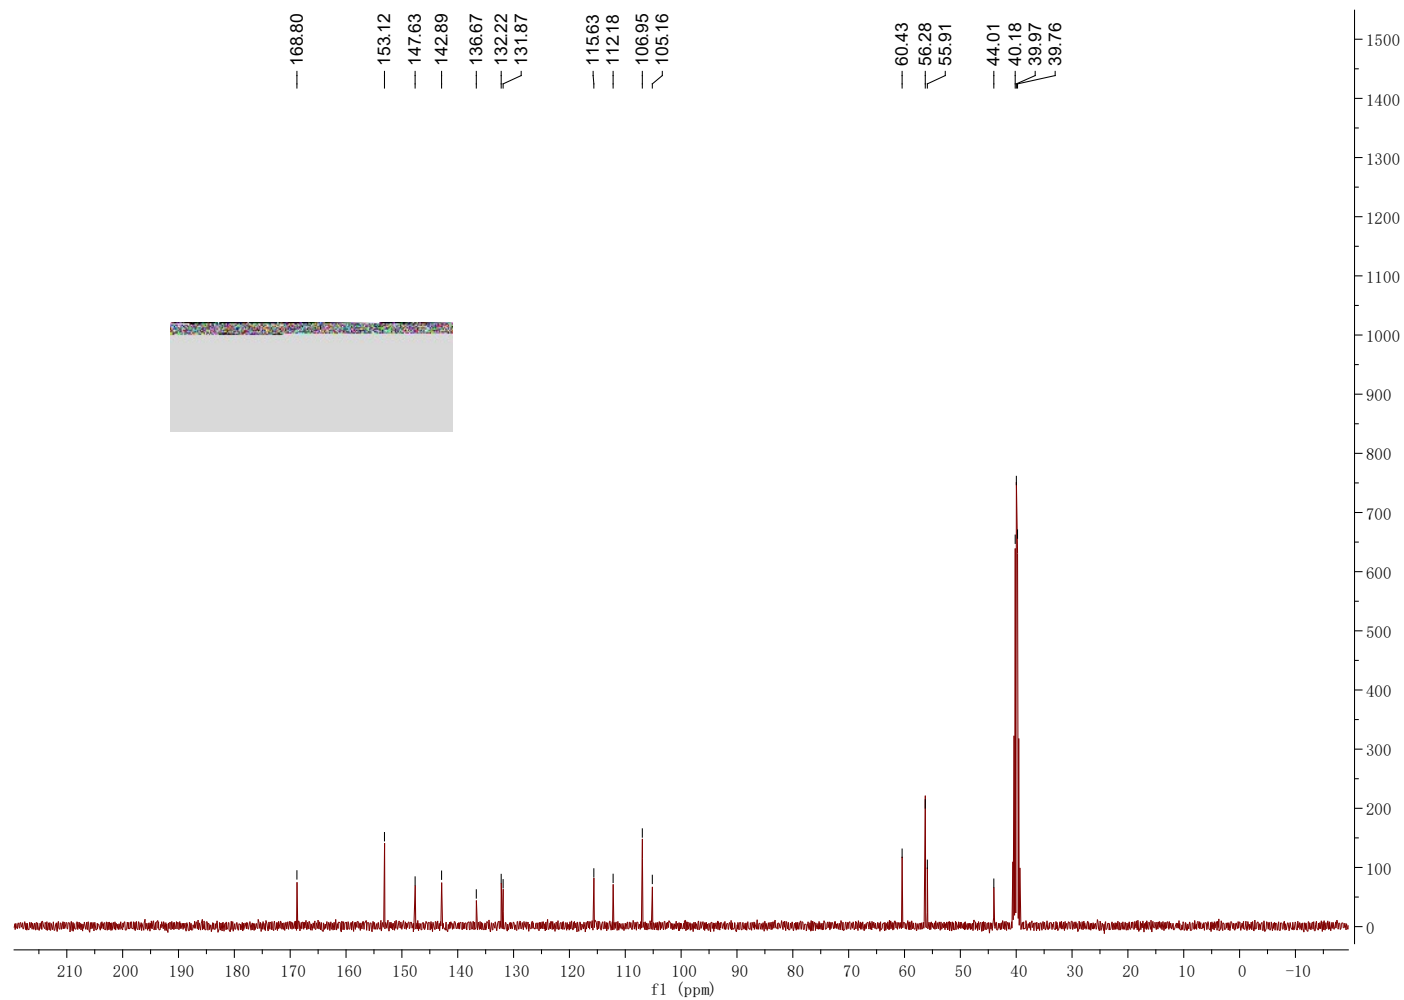

Figure S21. <sup>1</sup>H NMR of Compound 12

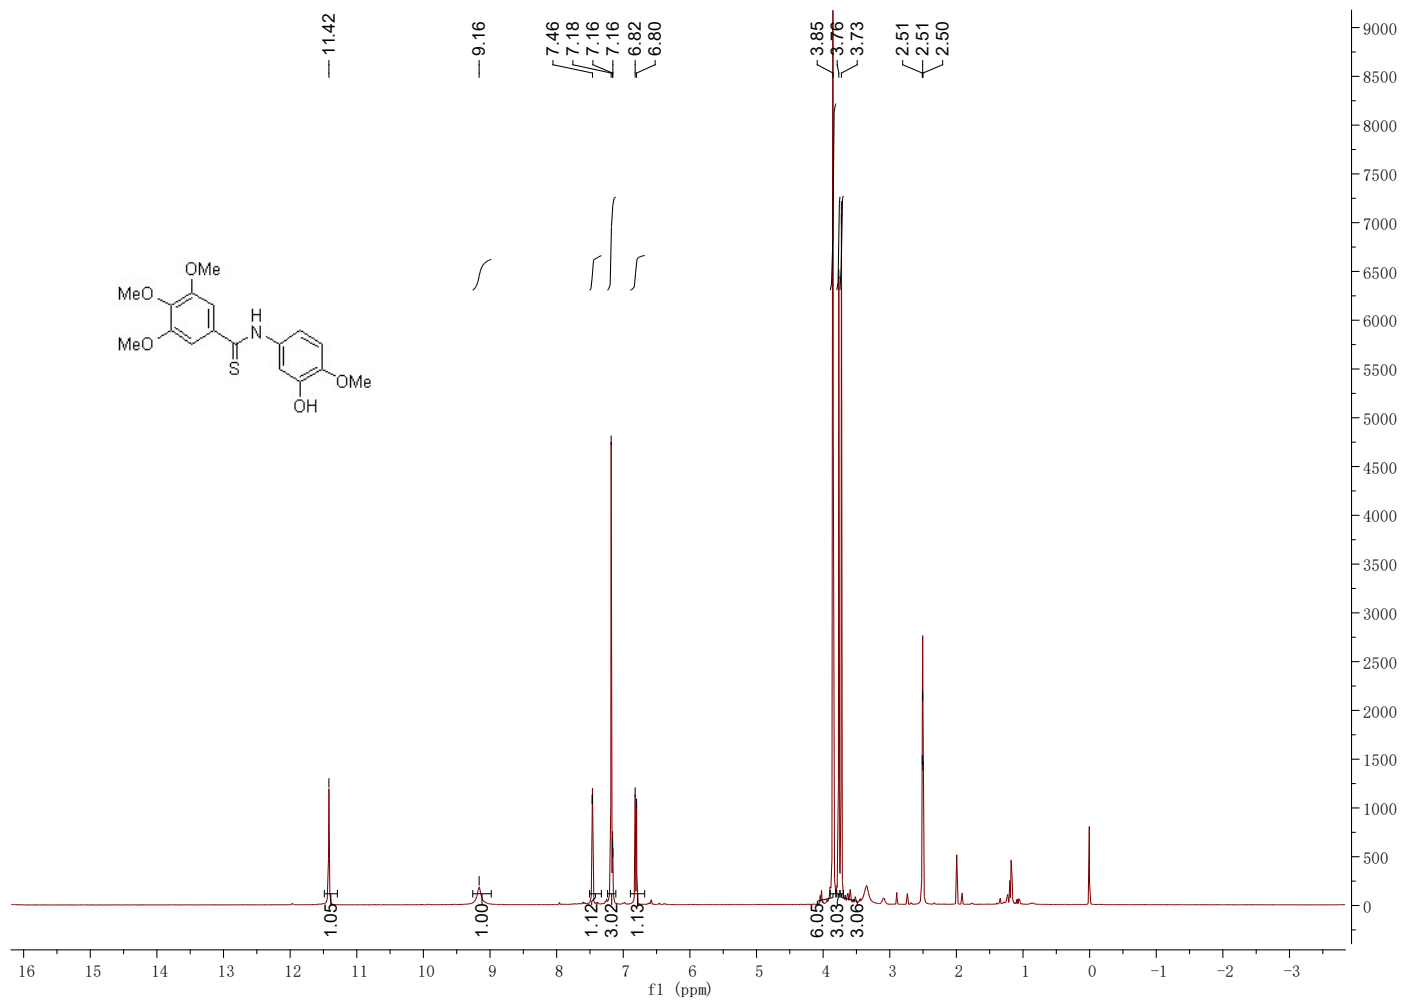

Figure S22.  $^{13}\text{C}$ -NMR of Compound 12

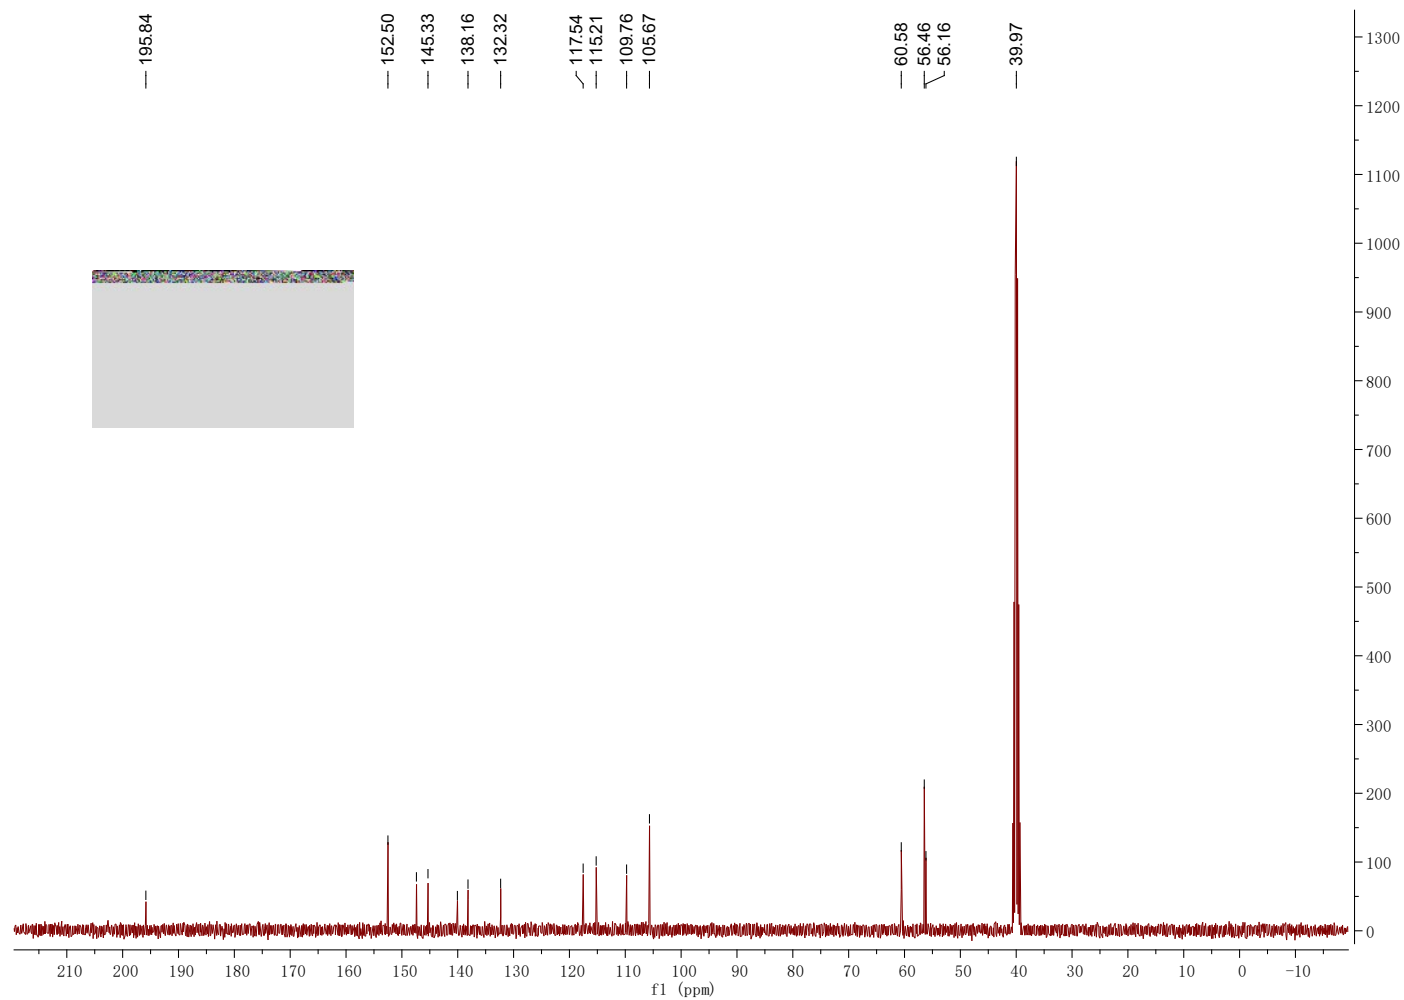

Figure S23. <sup>1</sup>H NMR of Compound 13

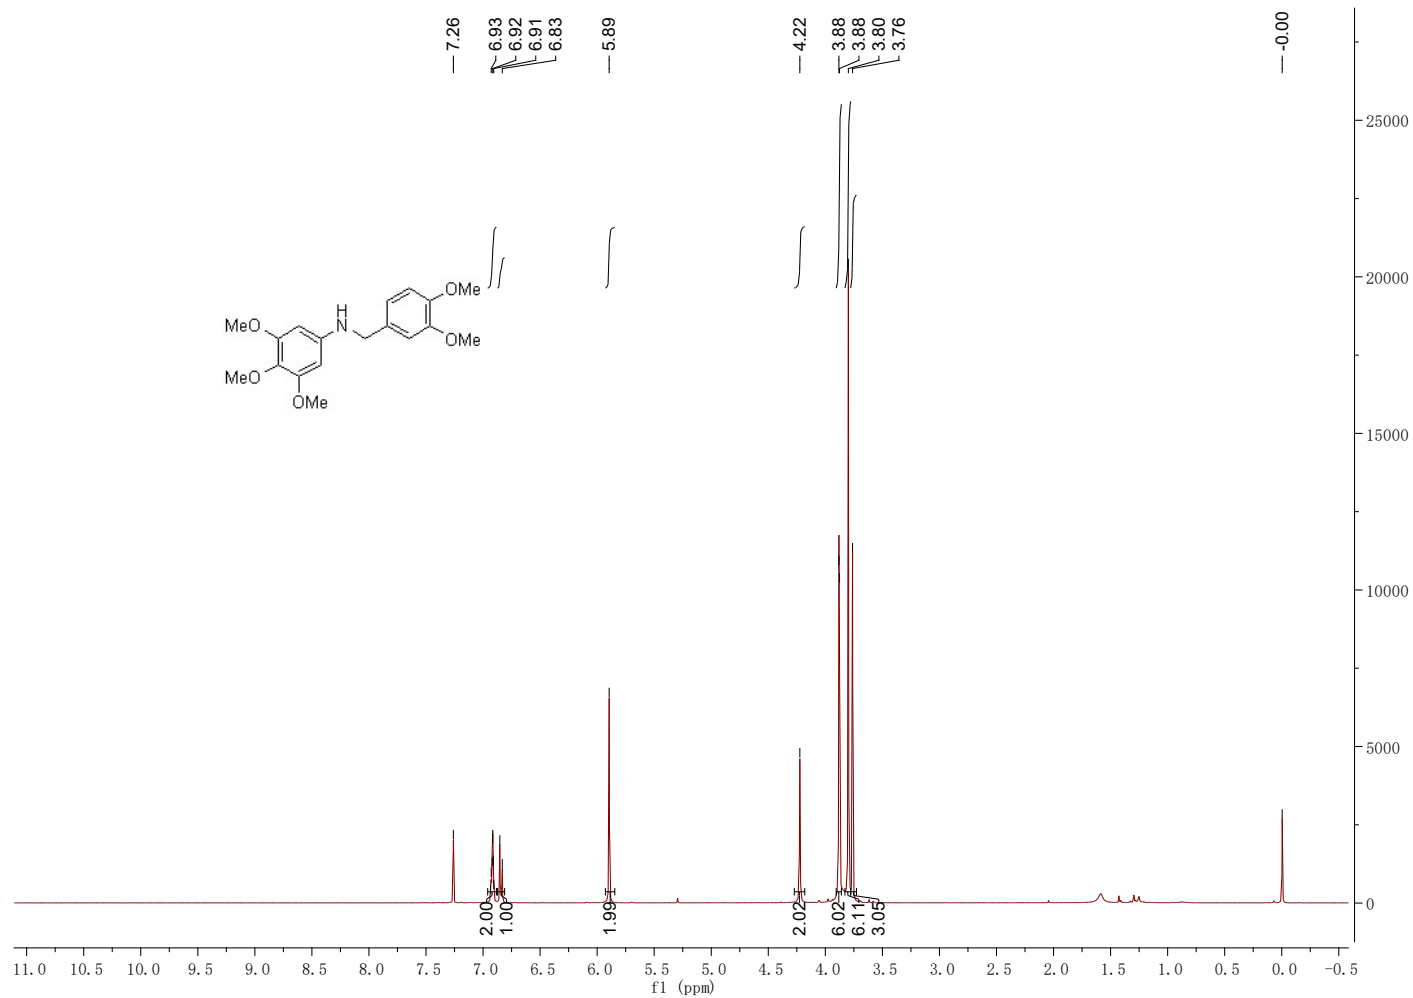

Figure S24.  $^{13}\text{C}$ -NMR of Compound 13

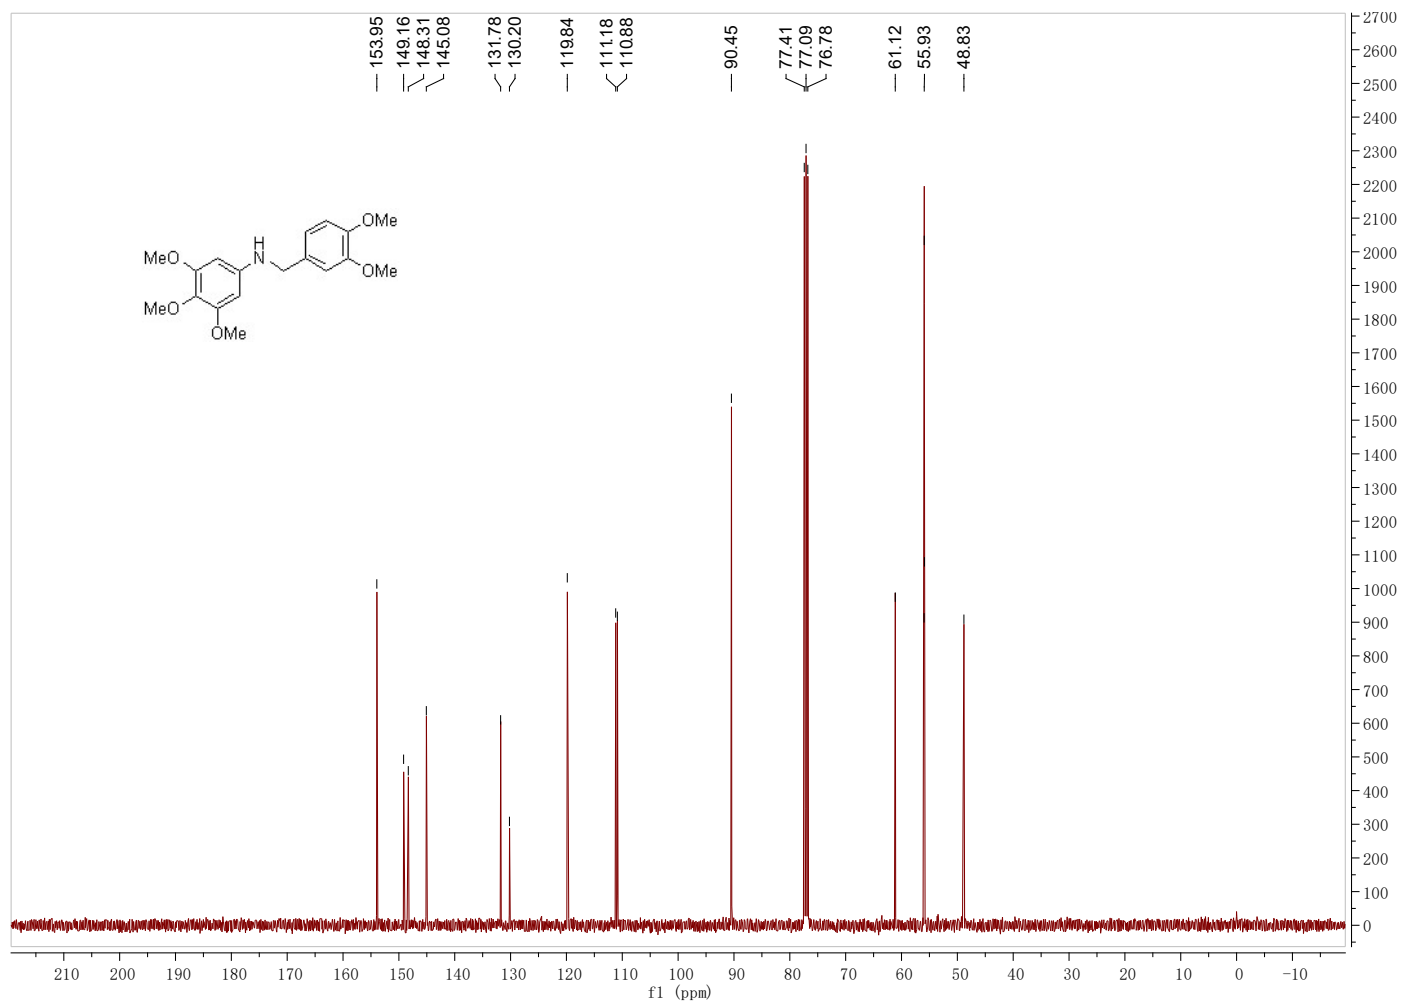

Figure S25. <sup>1</sup>H NMR of Compound 15

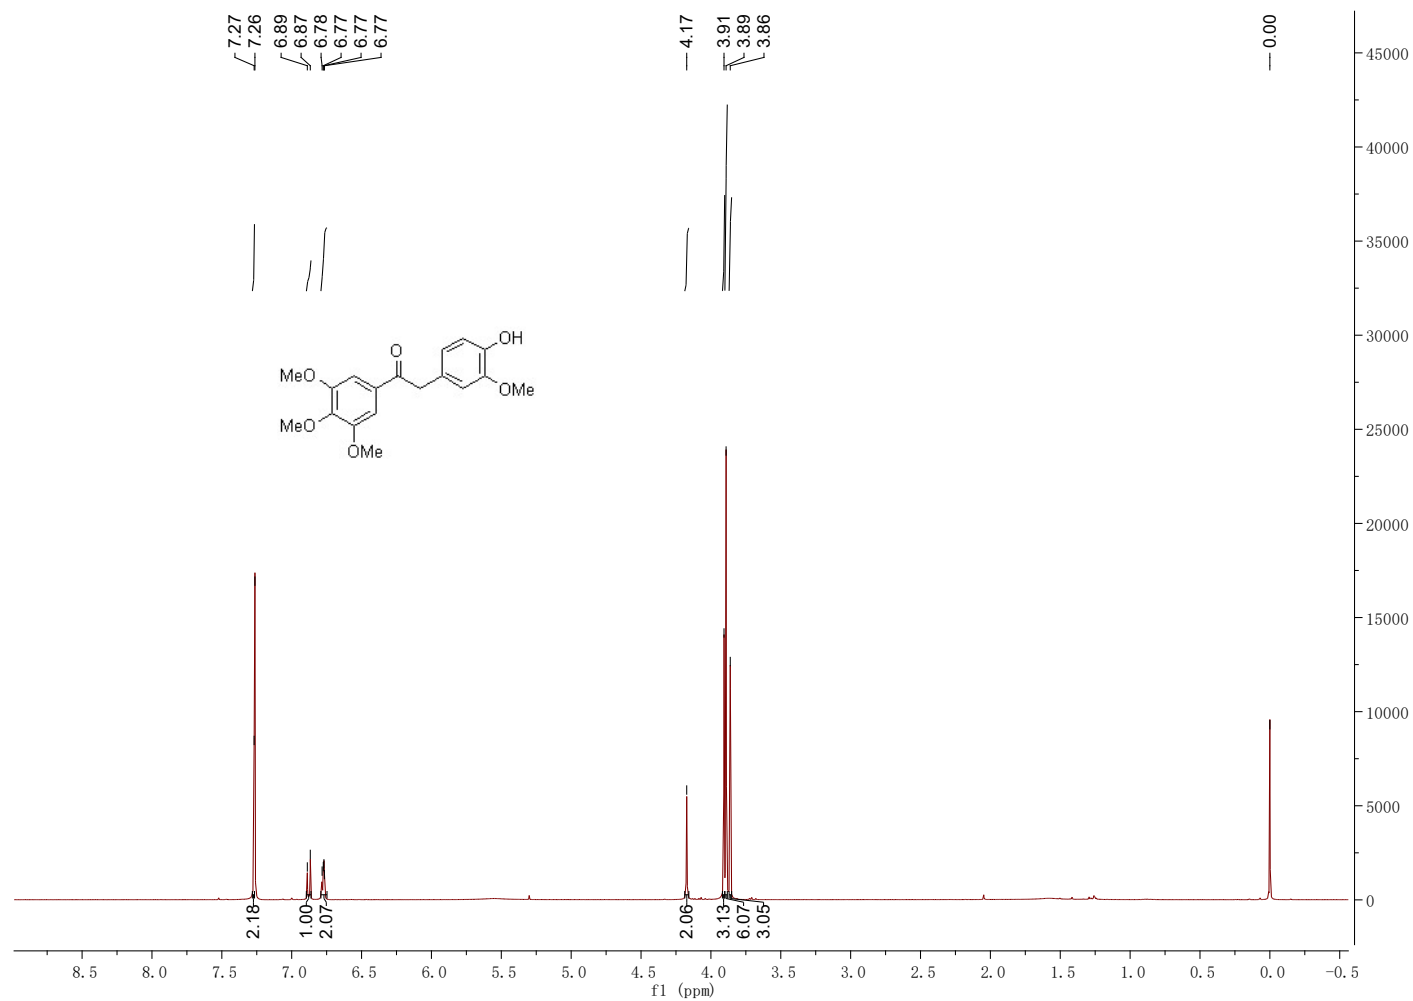

Figure S26. <sup>13</sup>C-NMR of Compound 15

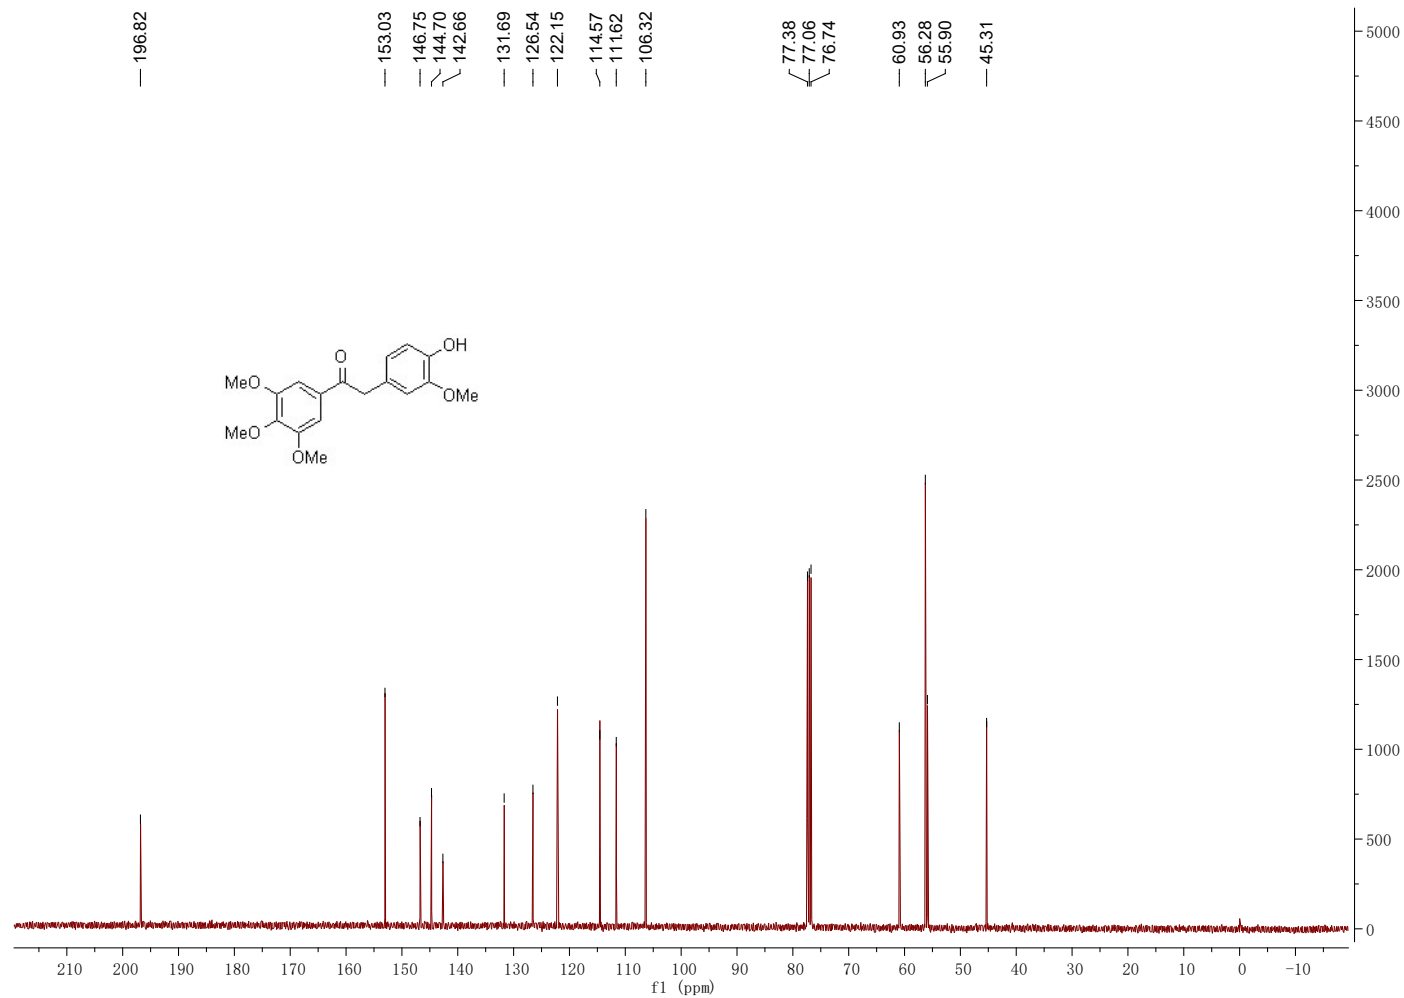



Figure S27. <sup>1</sup>H NMR of Compound 16

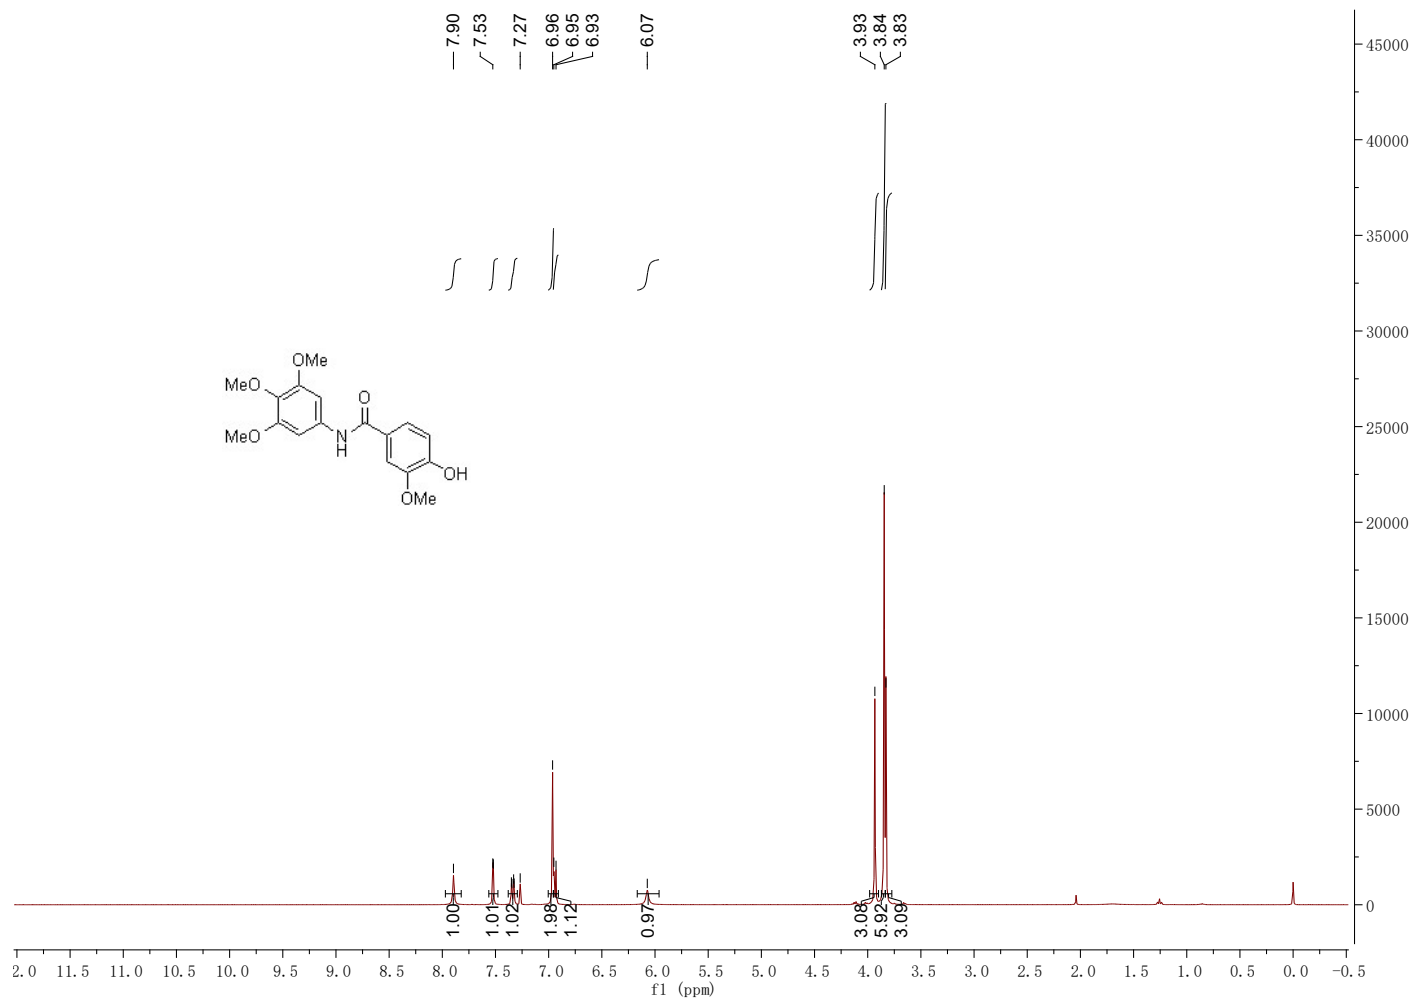

Figure S28.  $^{13}\text{C}$ -NMR of Compound 16

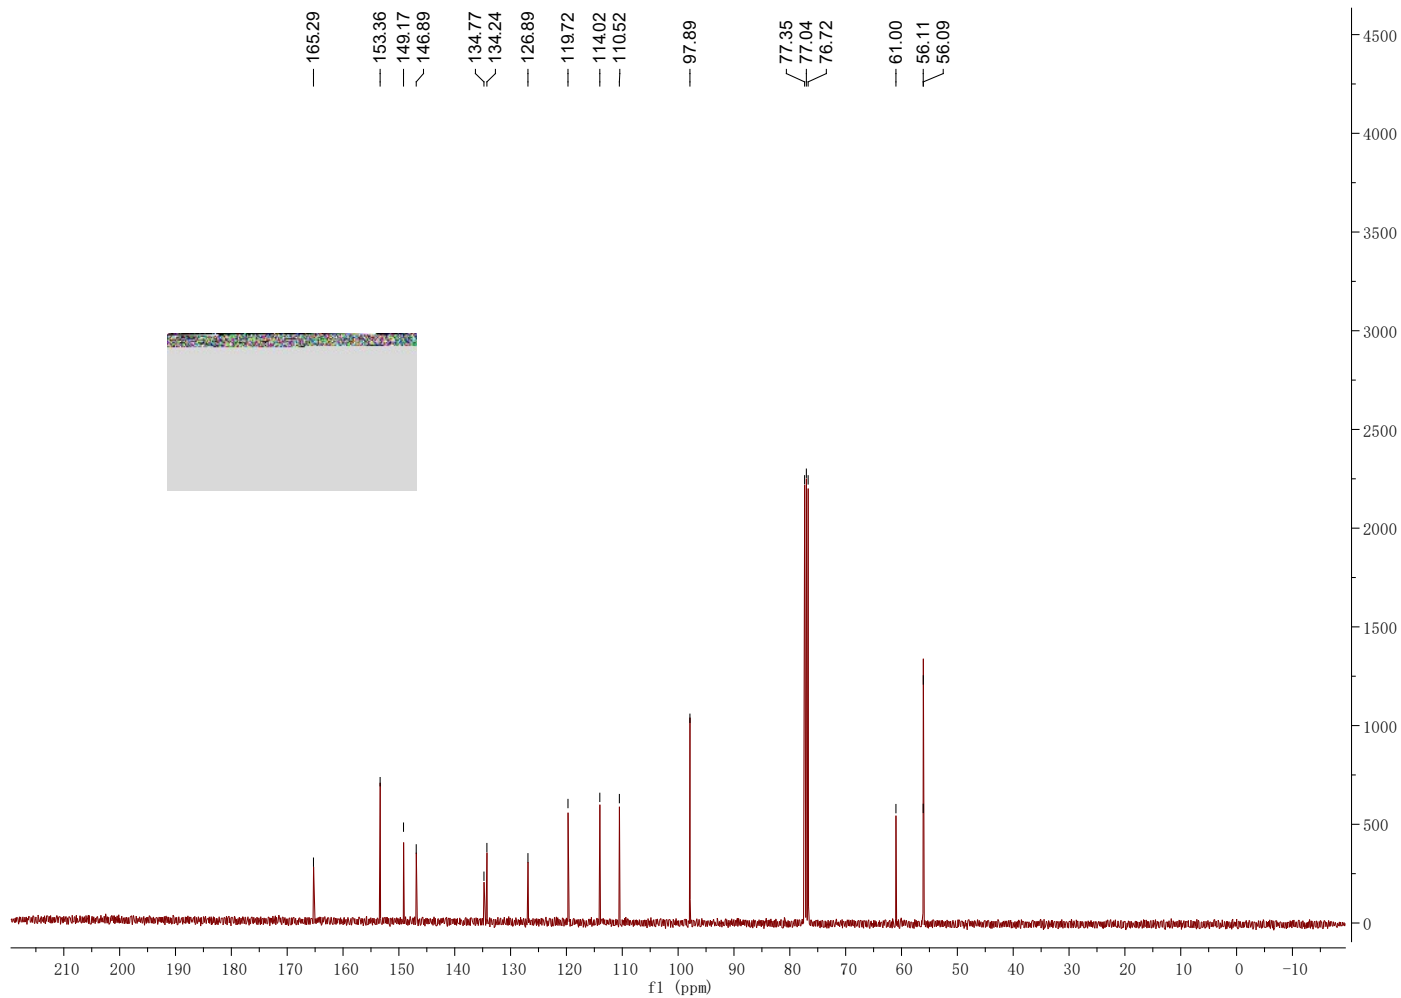

Figure S29. <sup>1</sup>H NMR of Compound 17

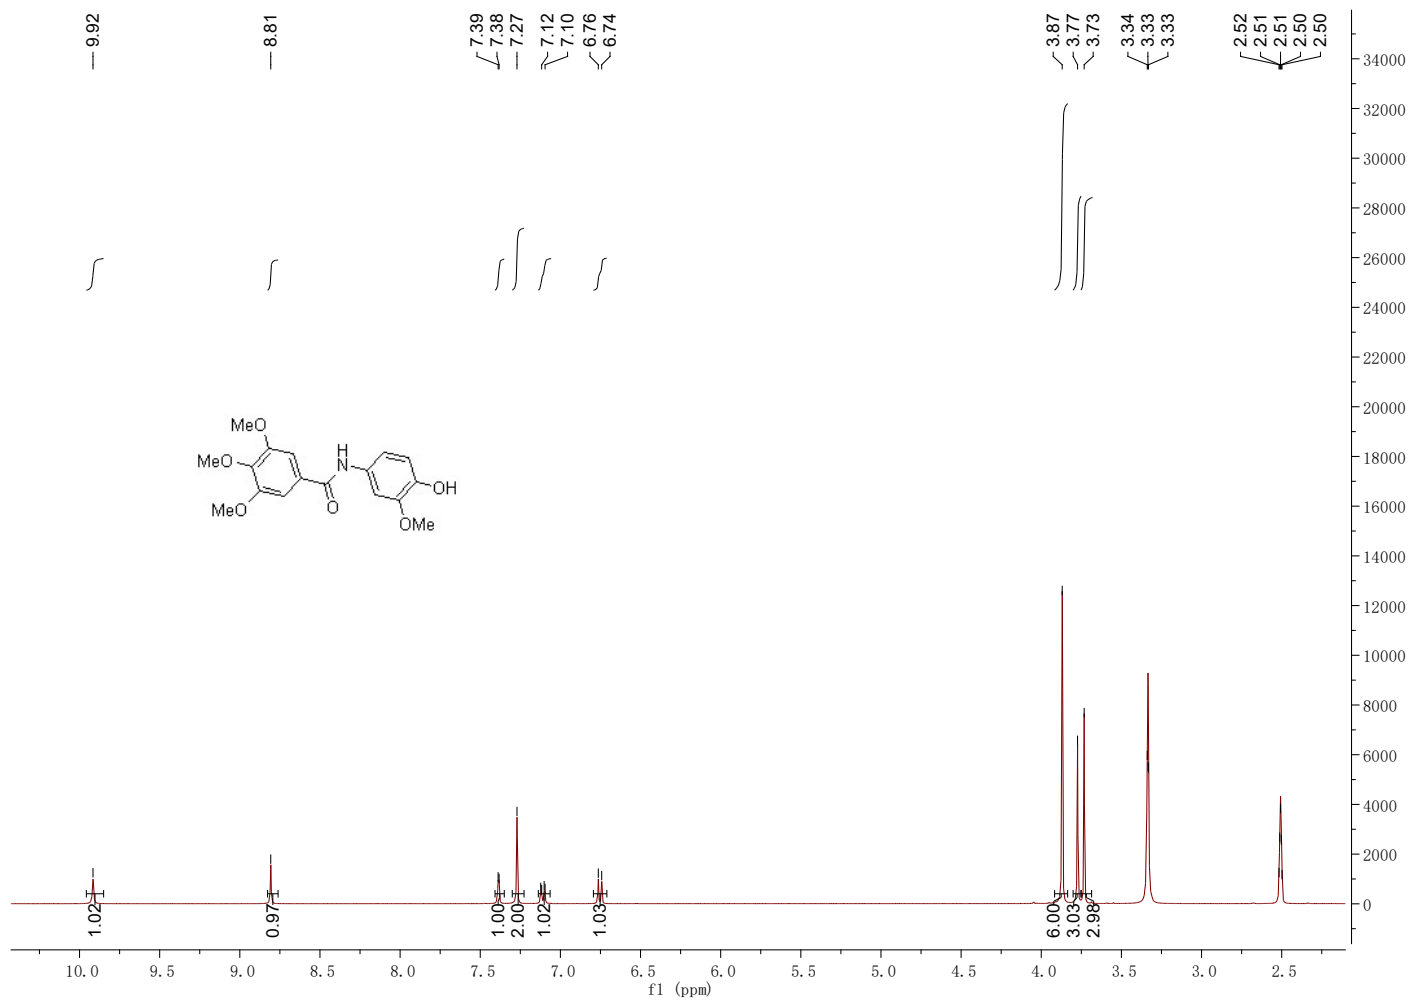

Figure S30.  $^{13}\text{C}$ -NMR of Compound 17

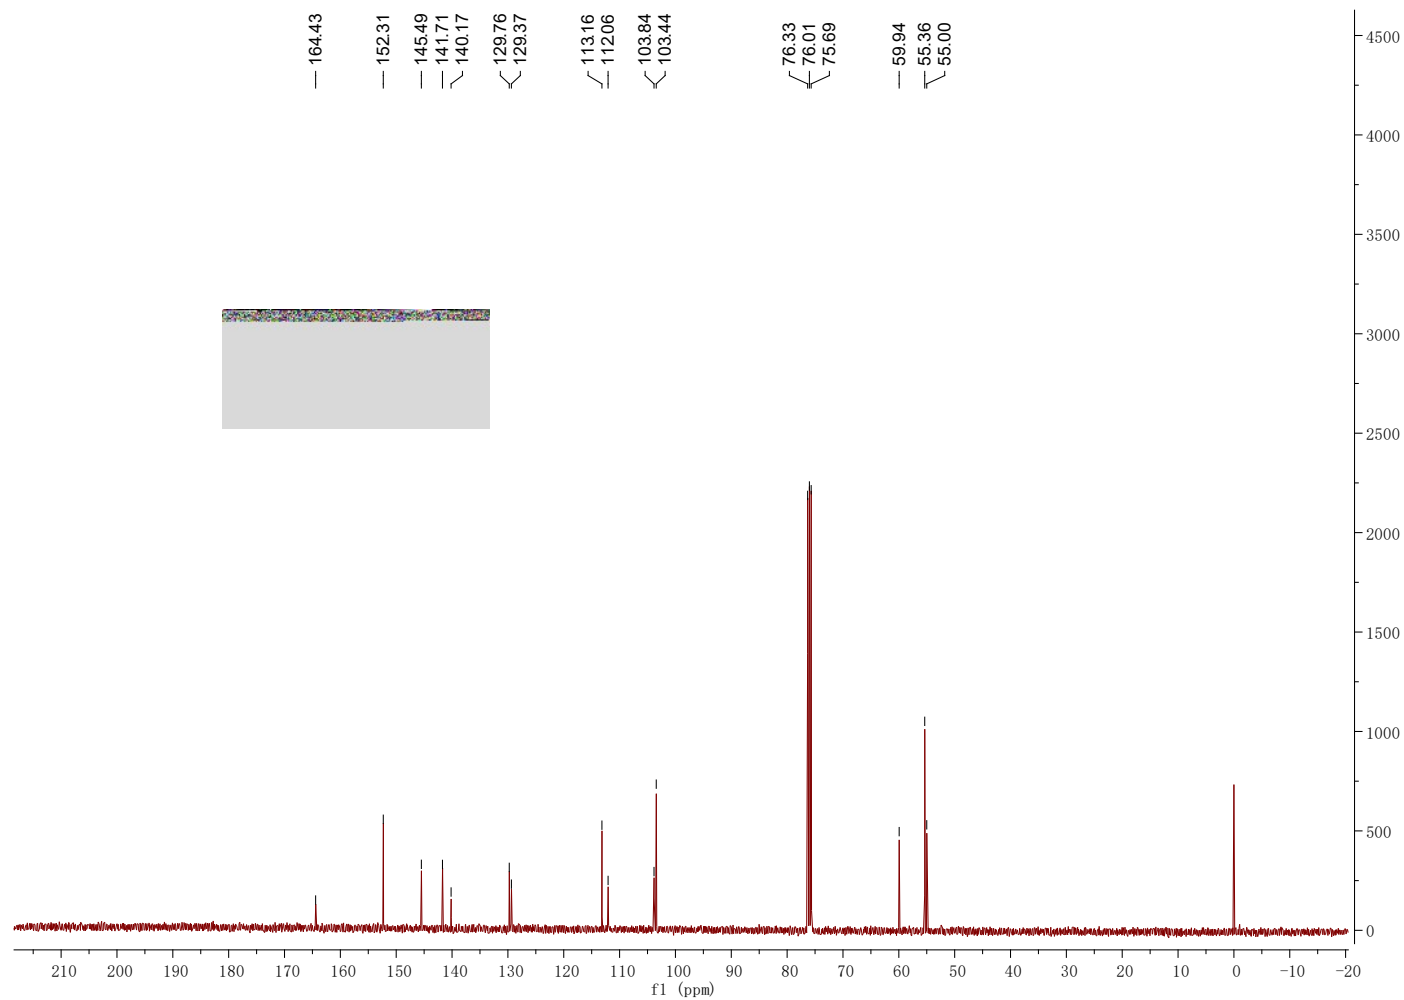

Figure S31. <sup>1</sup>H NMR of Compound 18

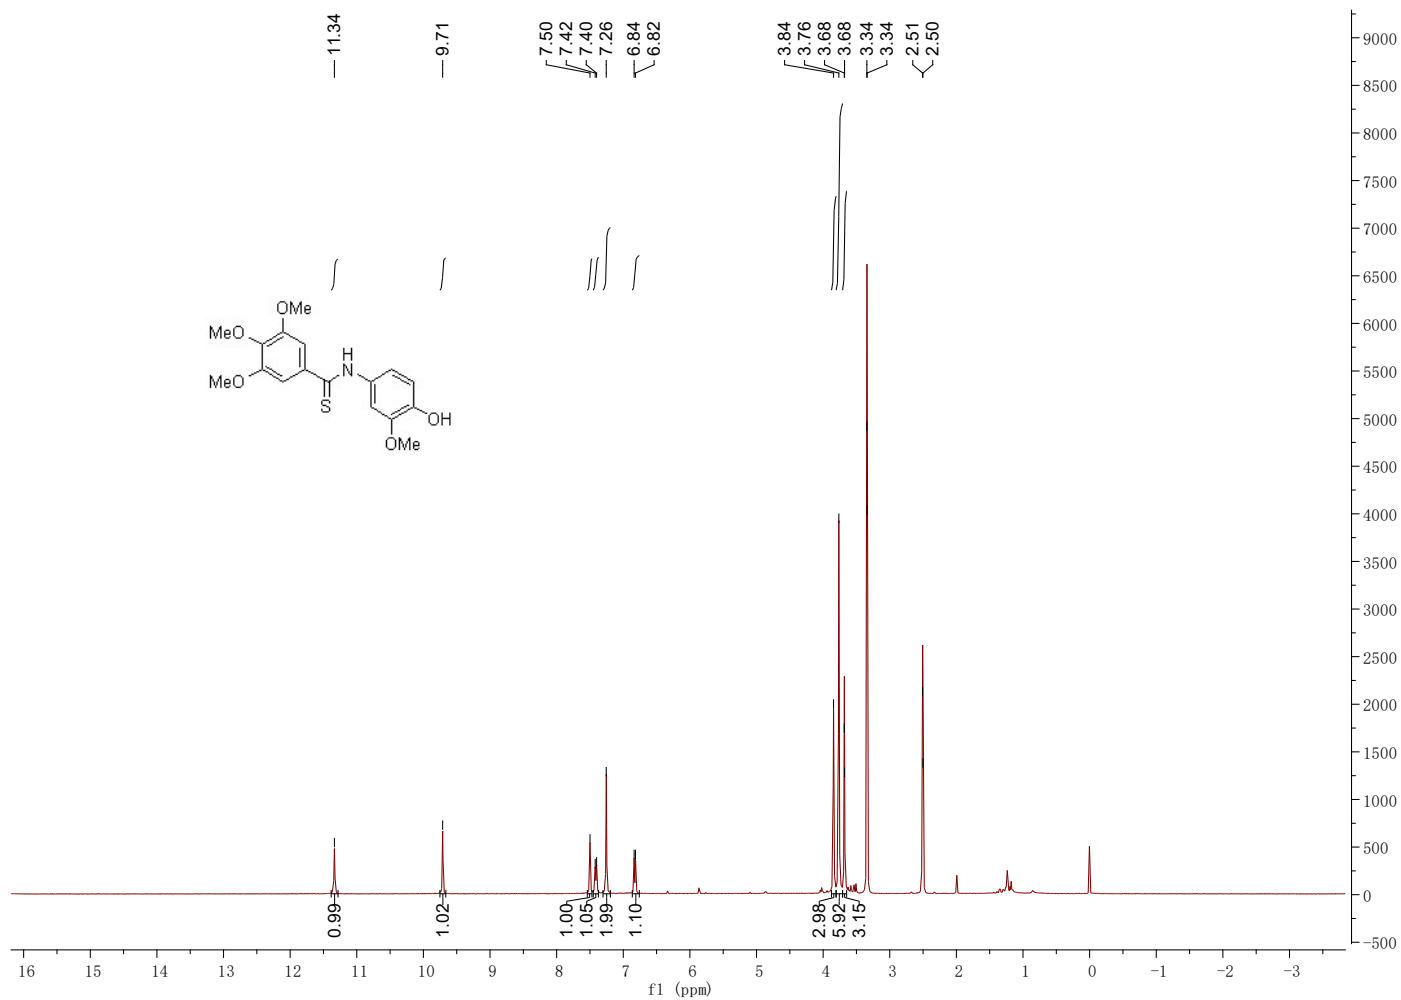

Figure S32.  $^{13}\text{C}$ -NMR of Compound 18

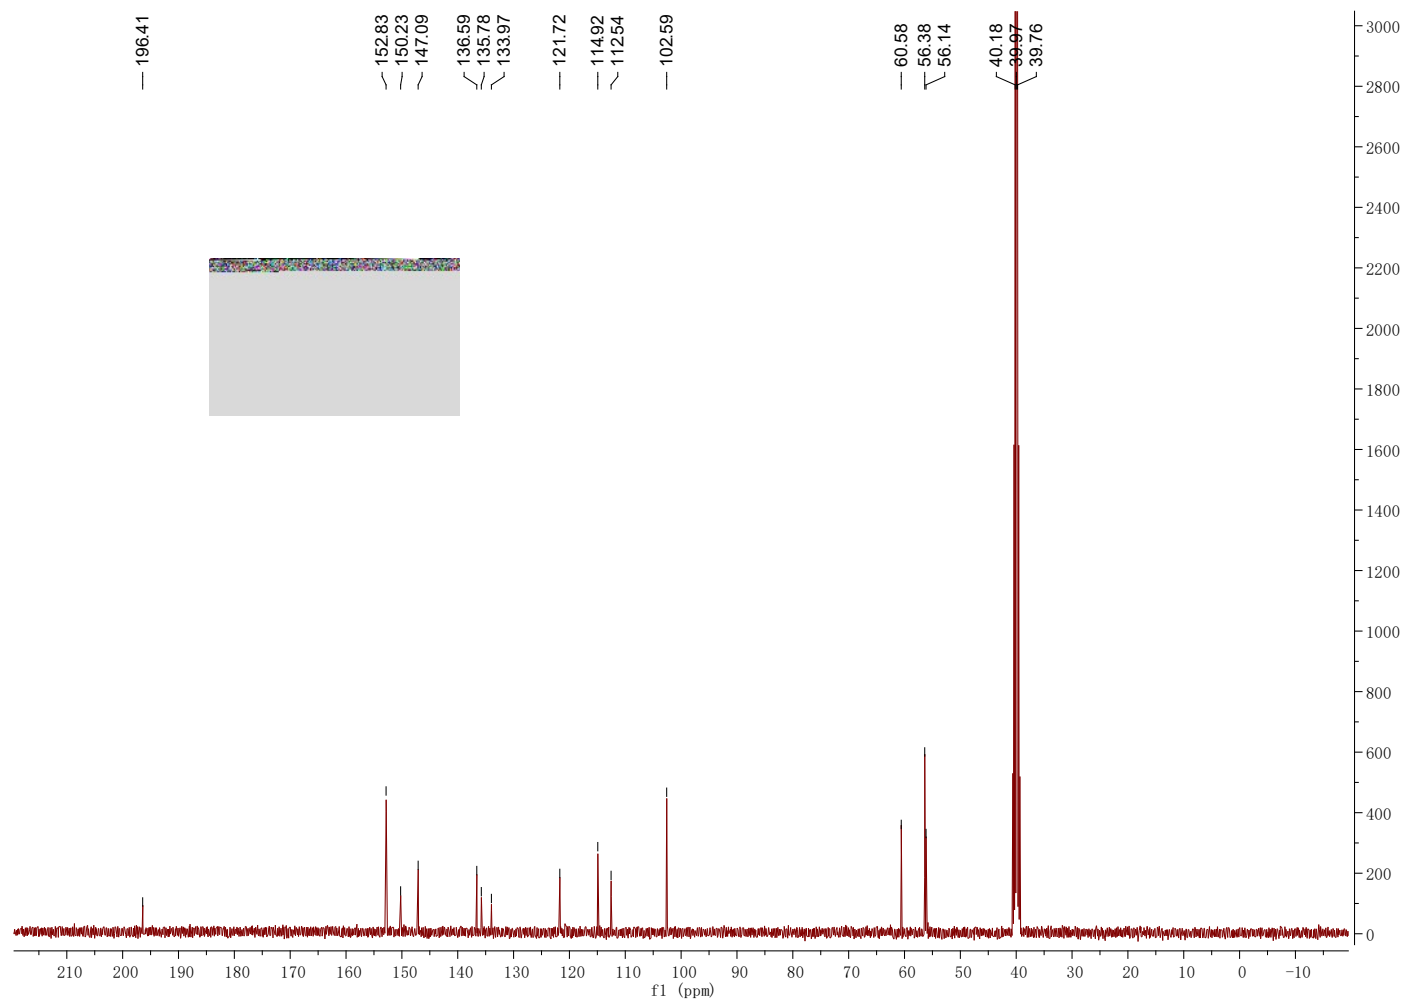

Figure S33. <sup>1</sup>H NMR of Compound 19

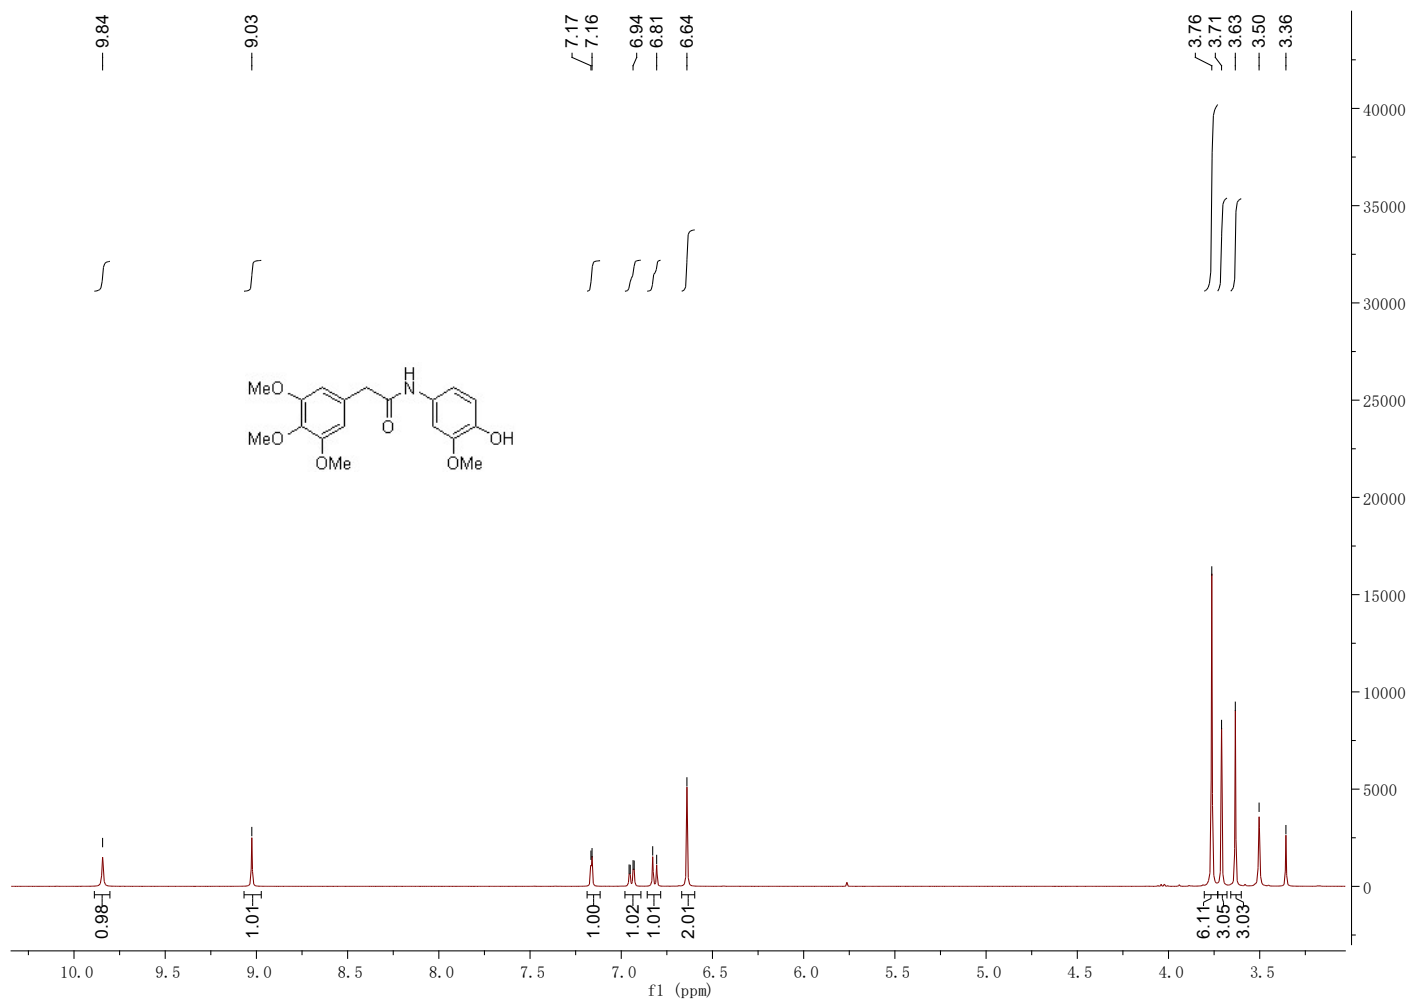

Figure S34.  $^{13}\text{C}$ -NMR of Compound 19

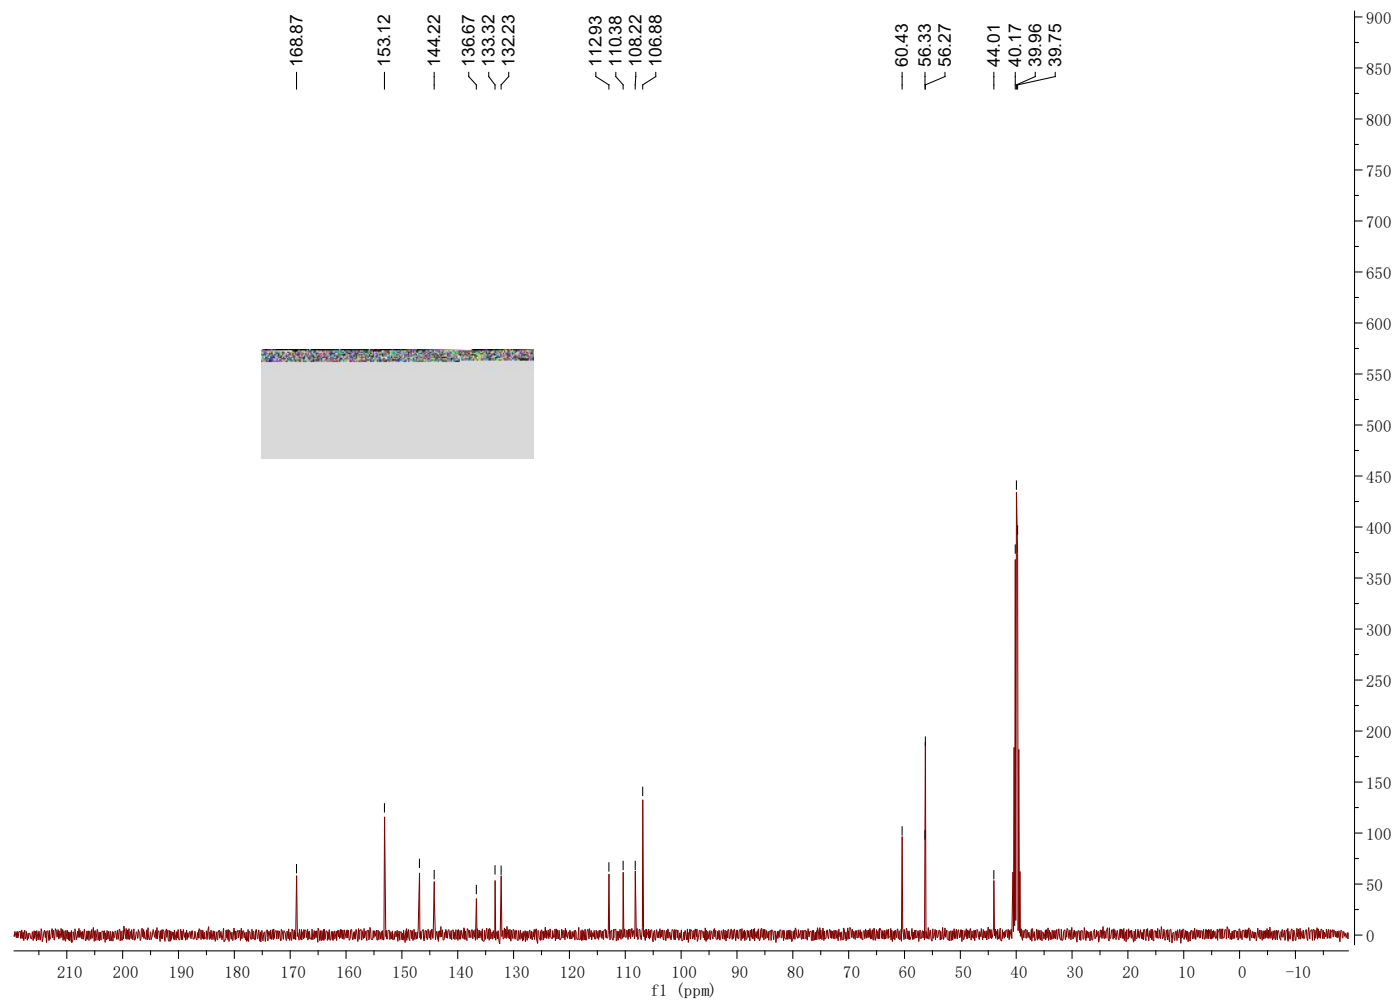



Figure S35. <sup>1</sup>H NMR of Compound 20

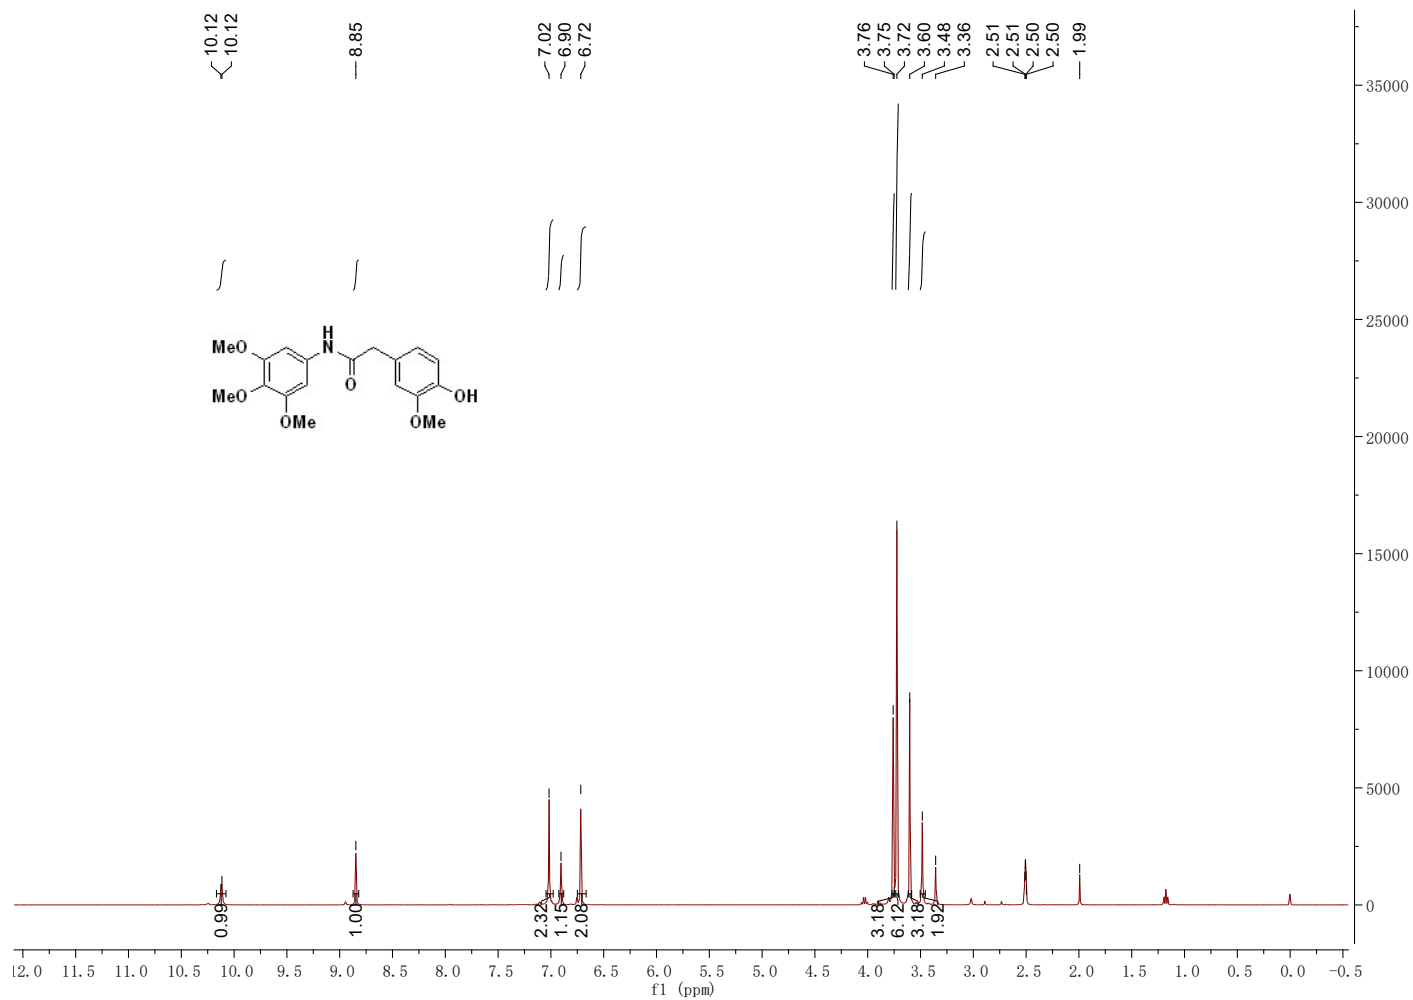

Figure S36.  $^{13}\text{C}$ -NMR of Compound 20

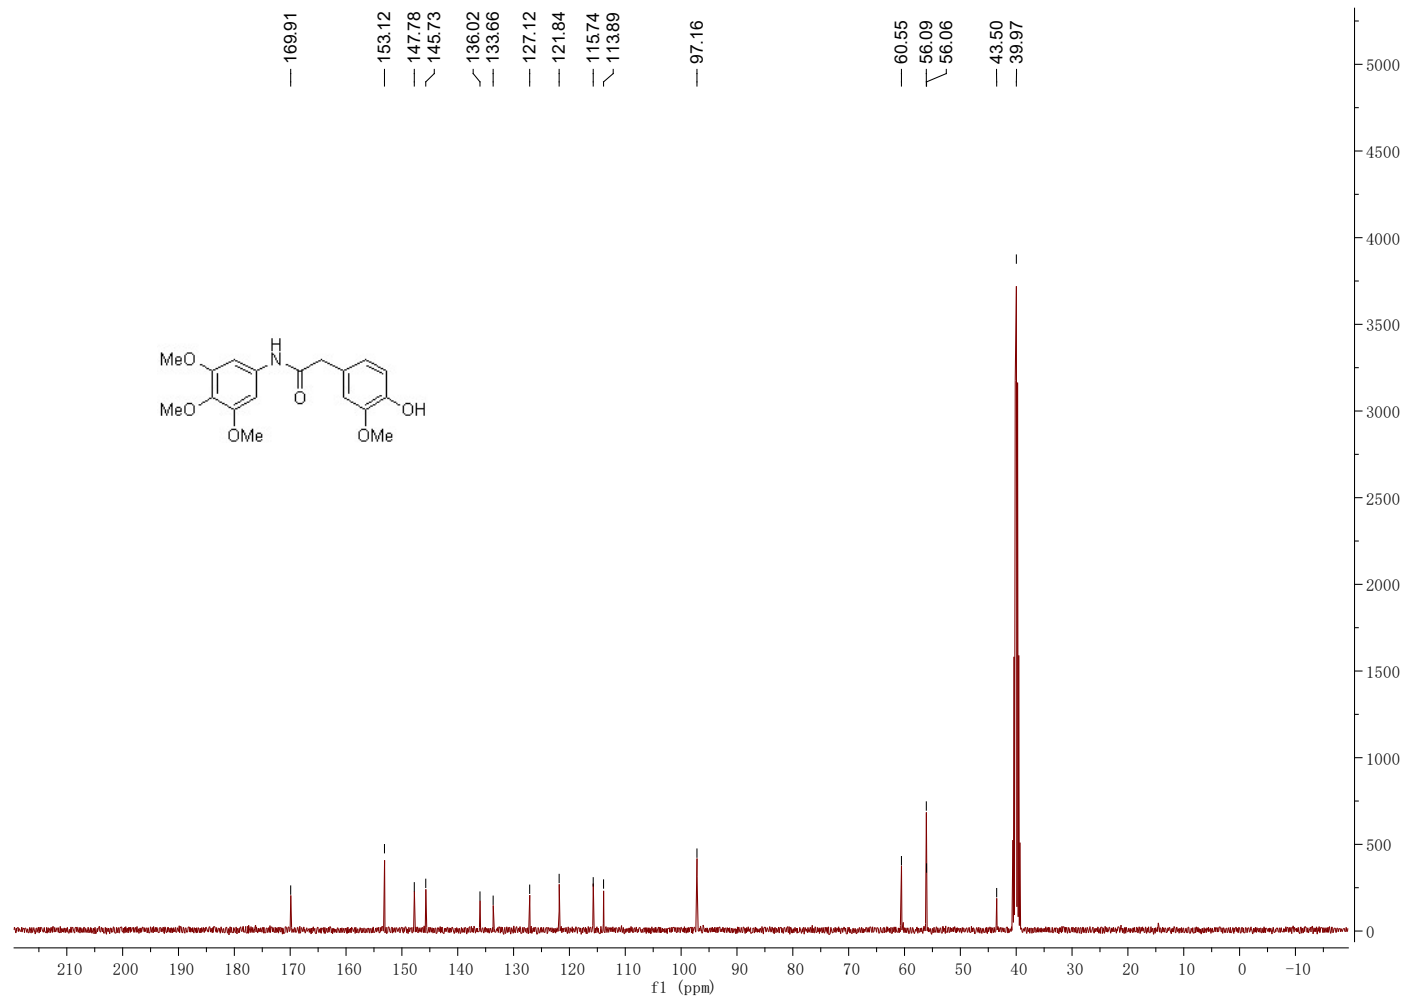

Figure S37. <sup>1</sup>H NMR of Compound 22

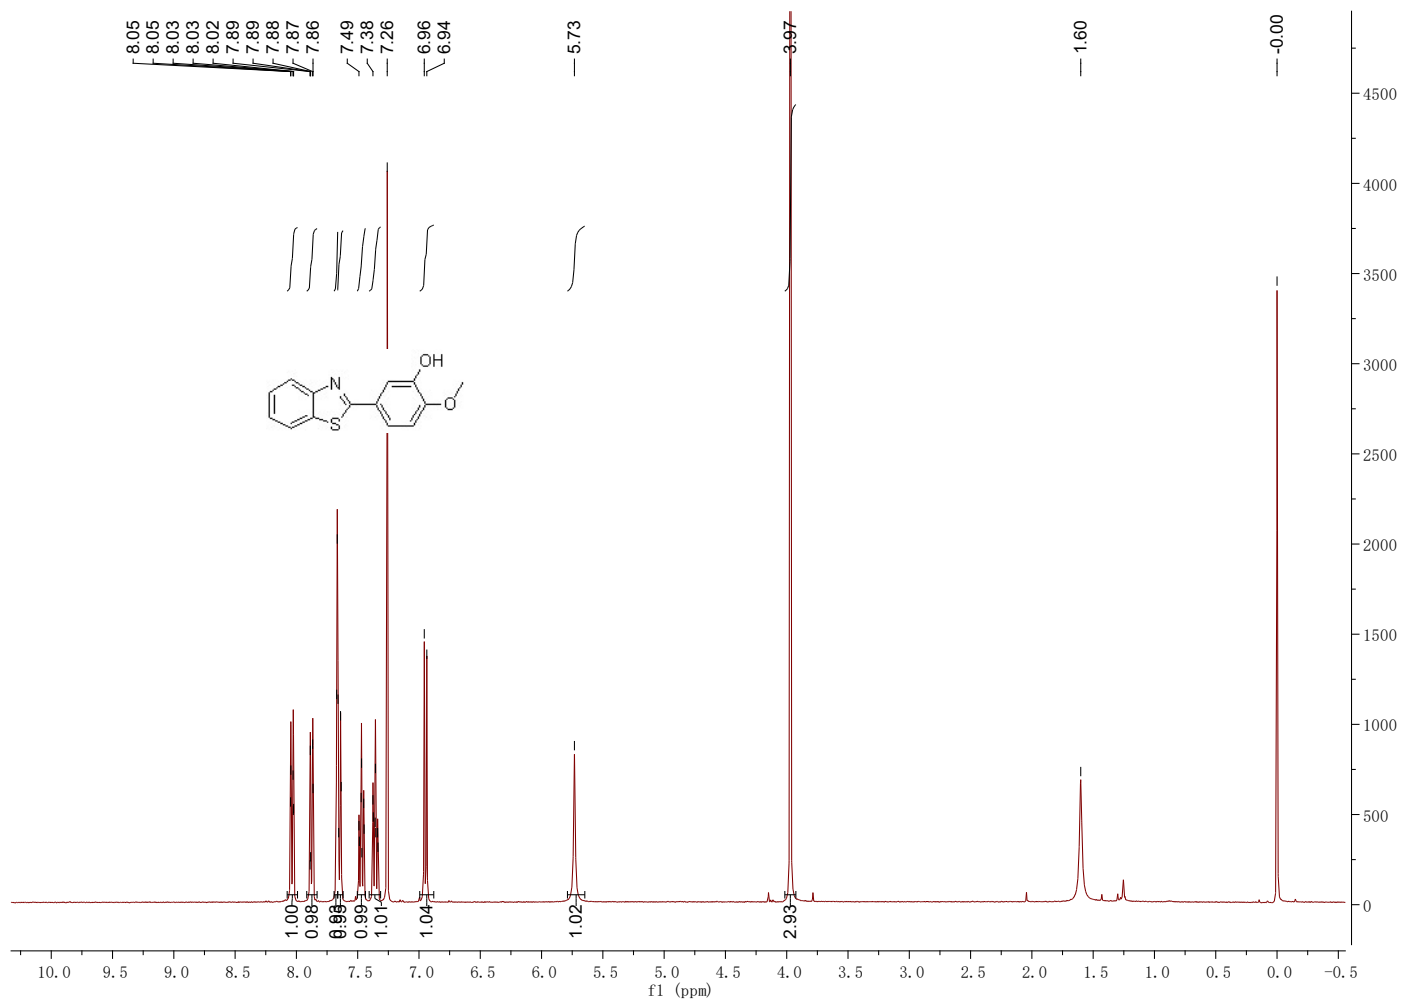

Figure S38. <sup>13</sup>C-NMR of Compound 22

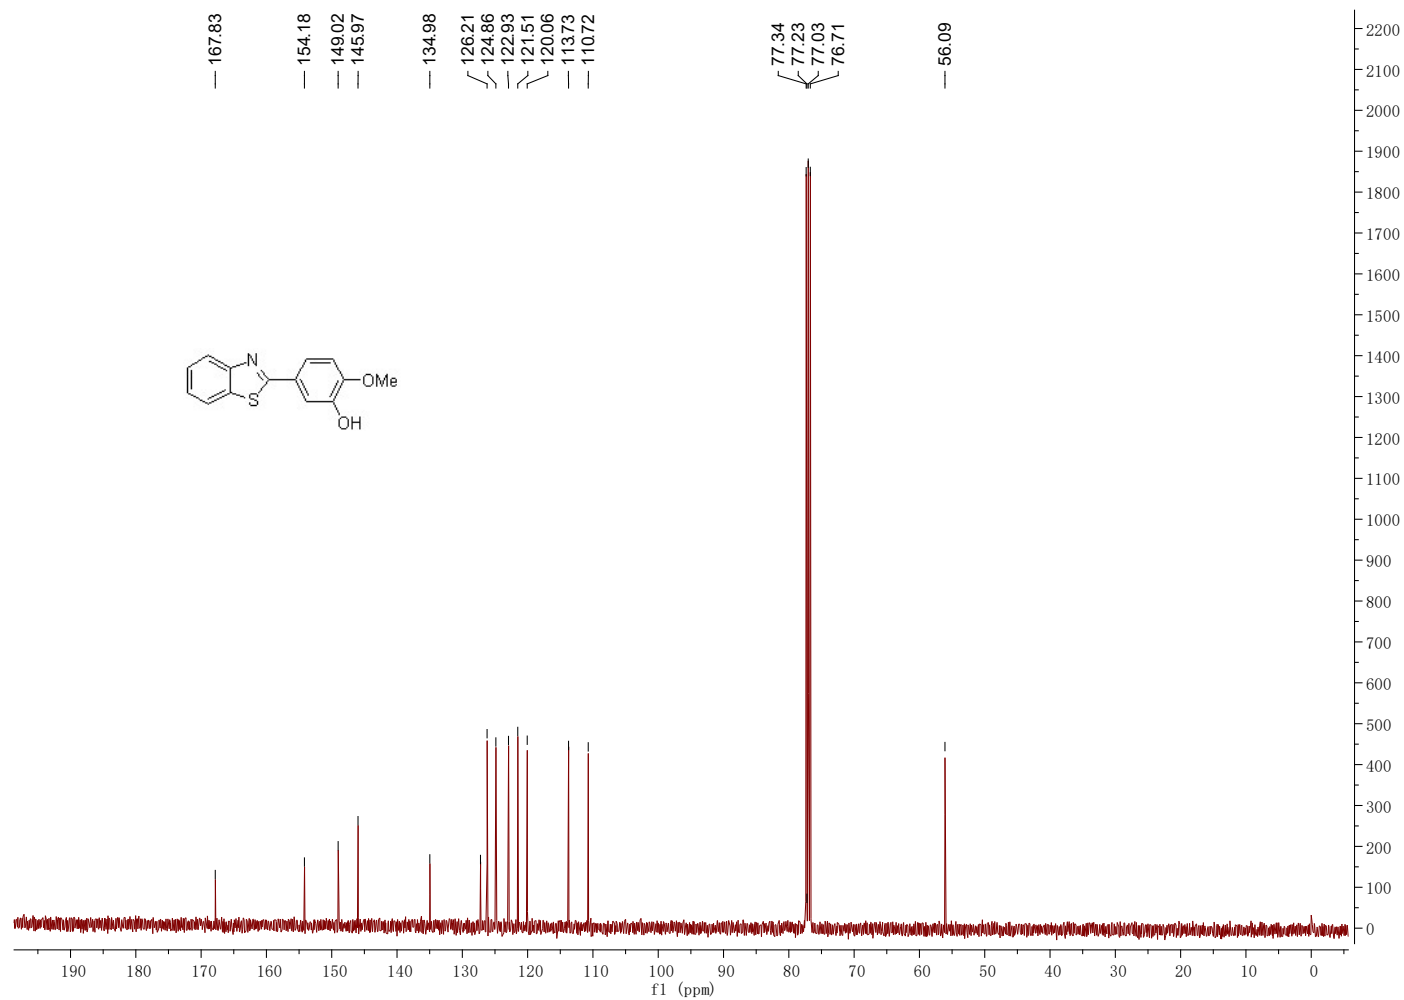

Figure S39. <sup>1</sup>H NMR of Compound 23

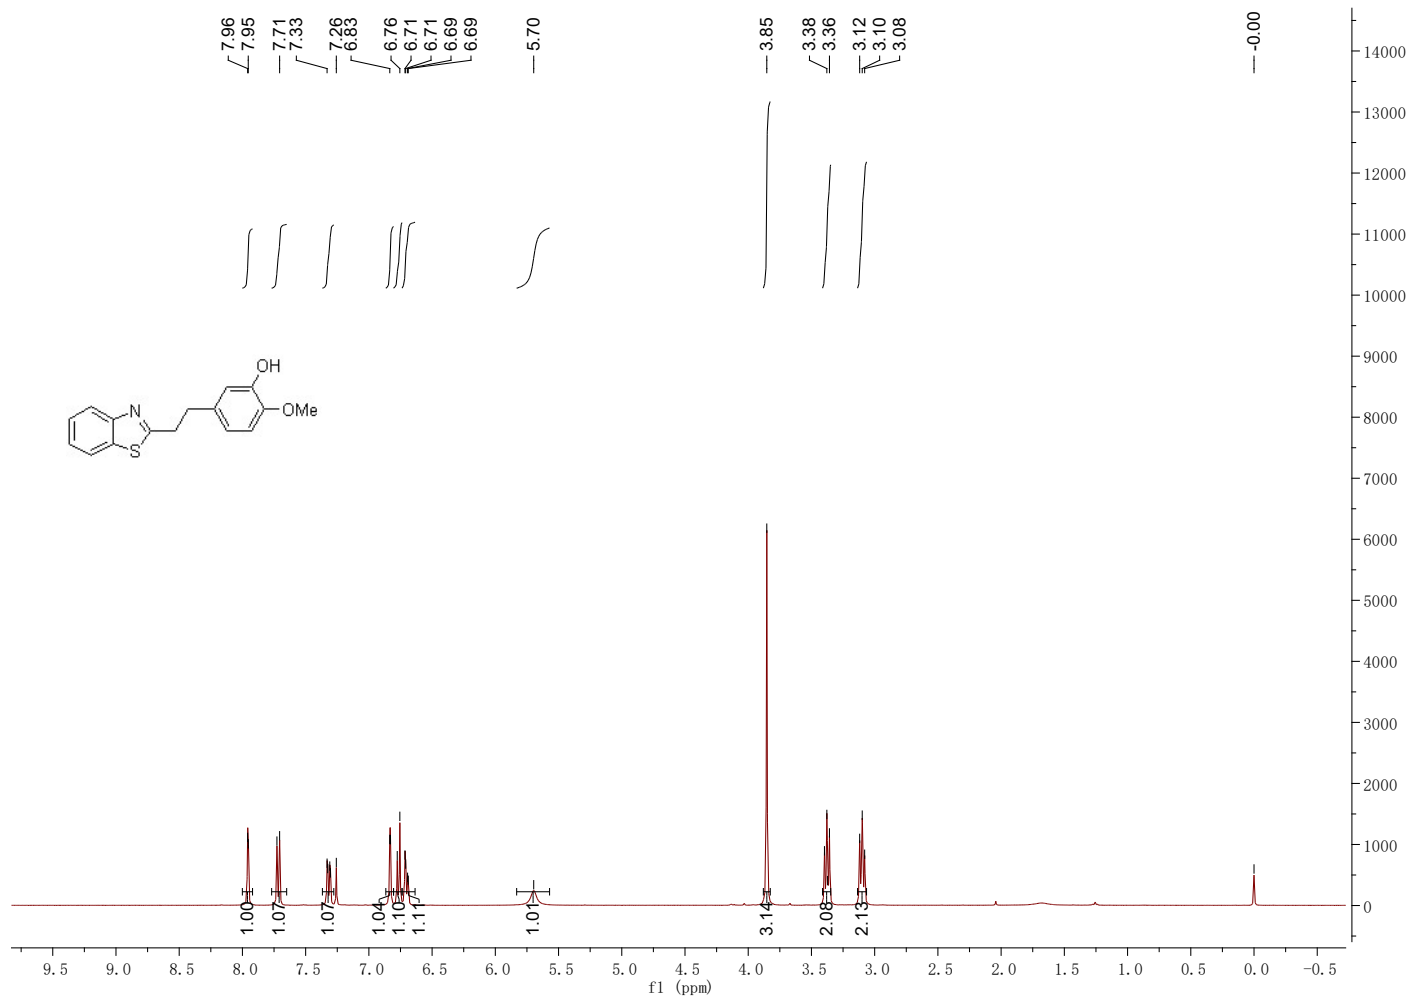

Figure S40. <sup>13</sup>C-NMR of Compound 23

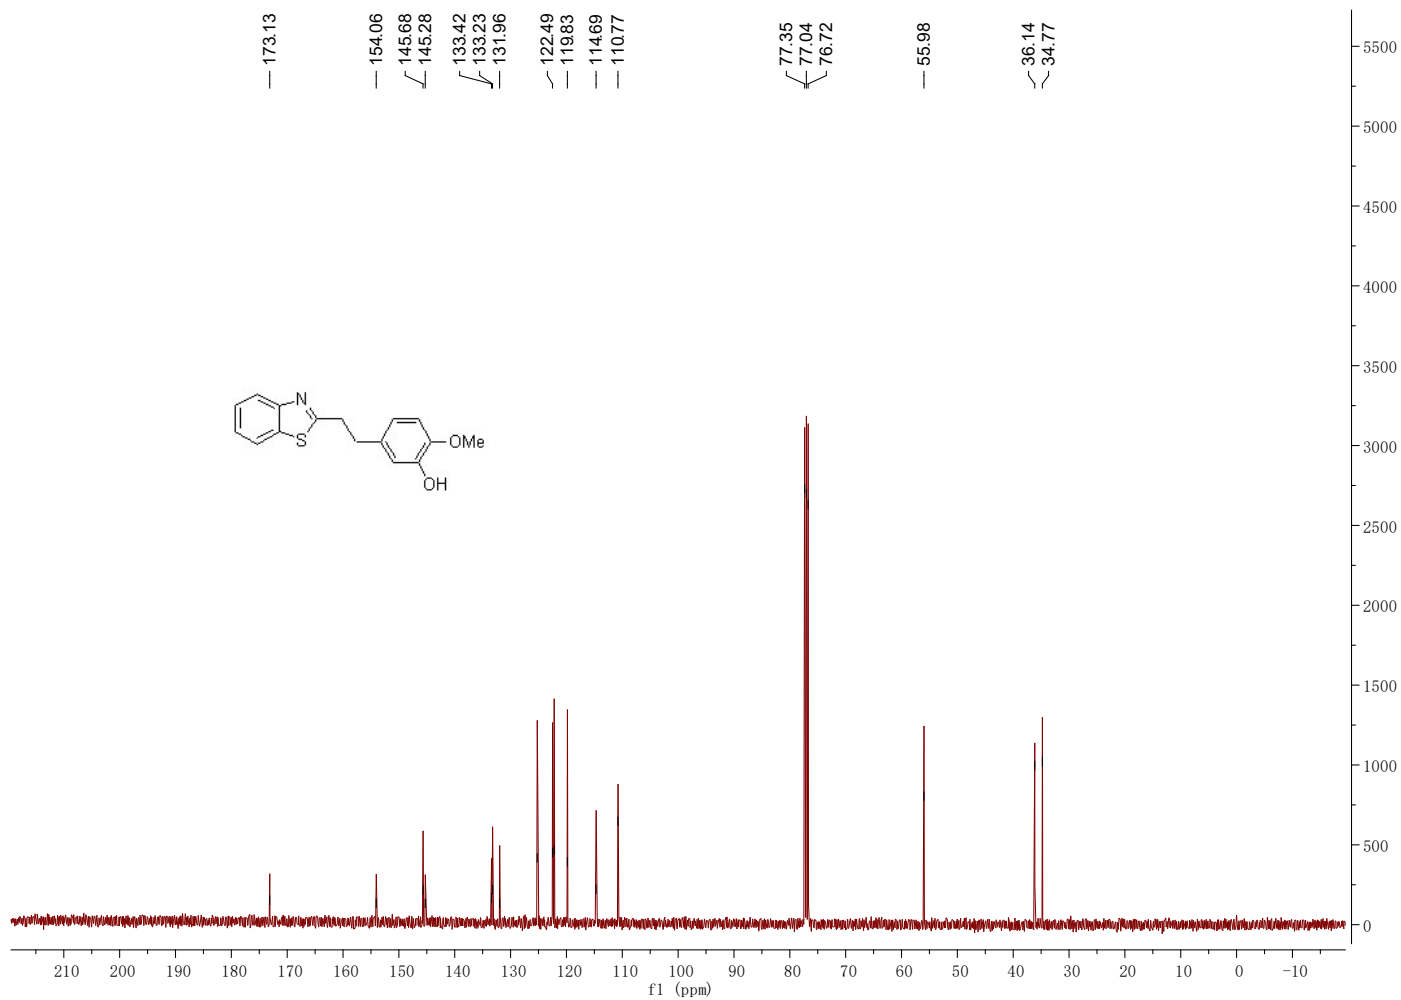

Figure S41. <sup>1</sup>H NMR of Compound 24

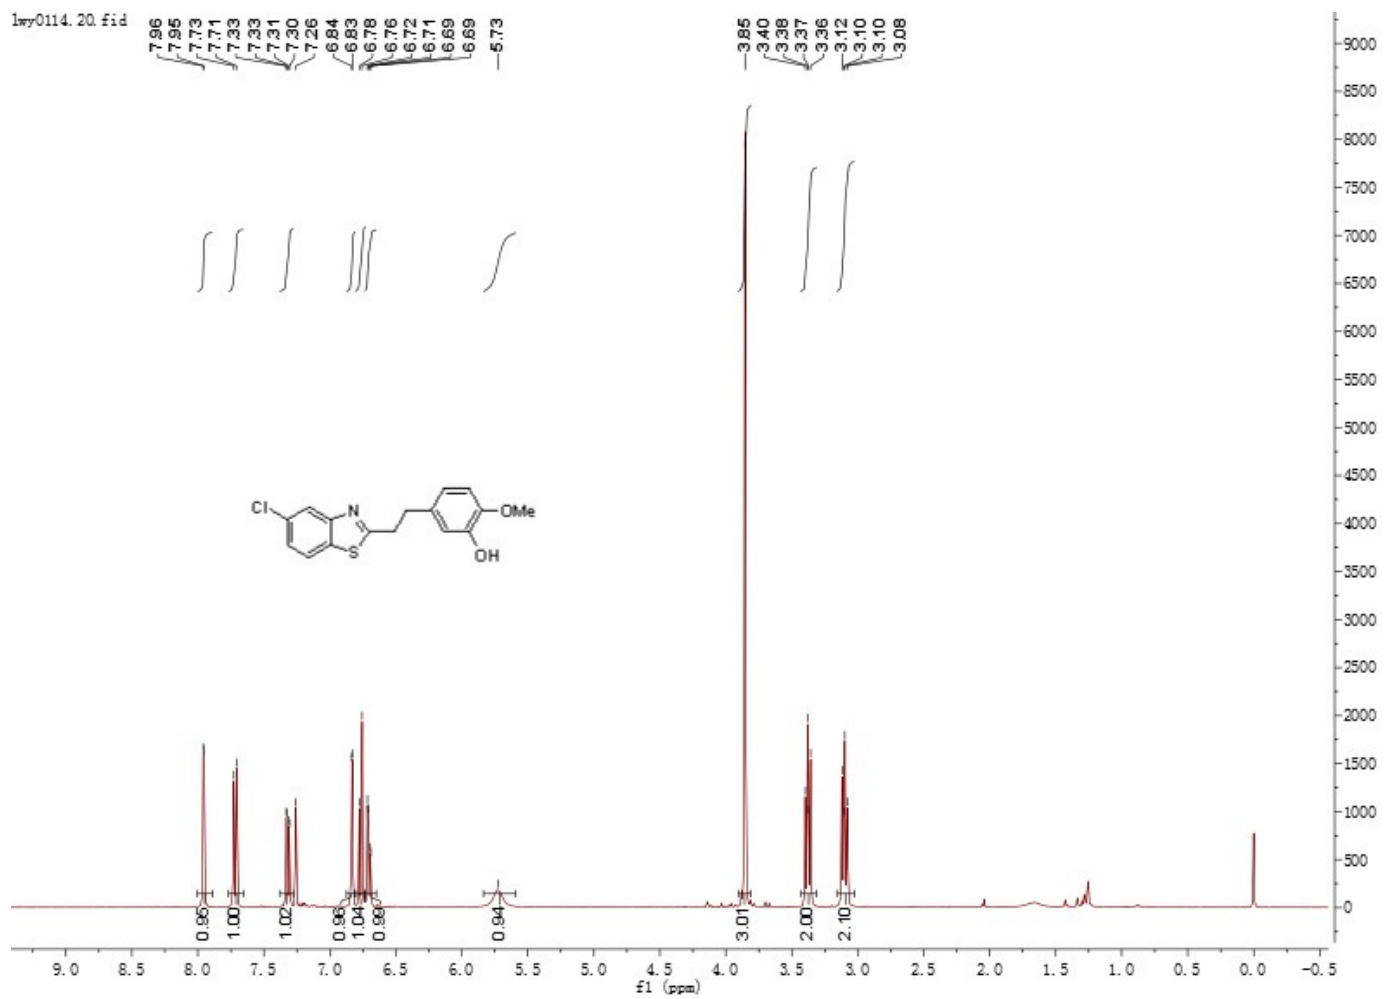

Figure S42.  $^{13}\text{C}$ -NMR of Compound 24

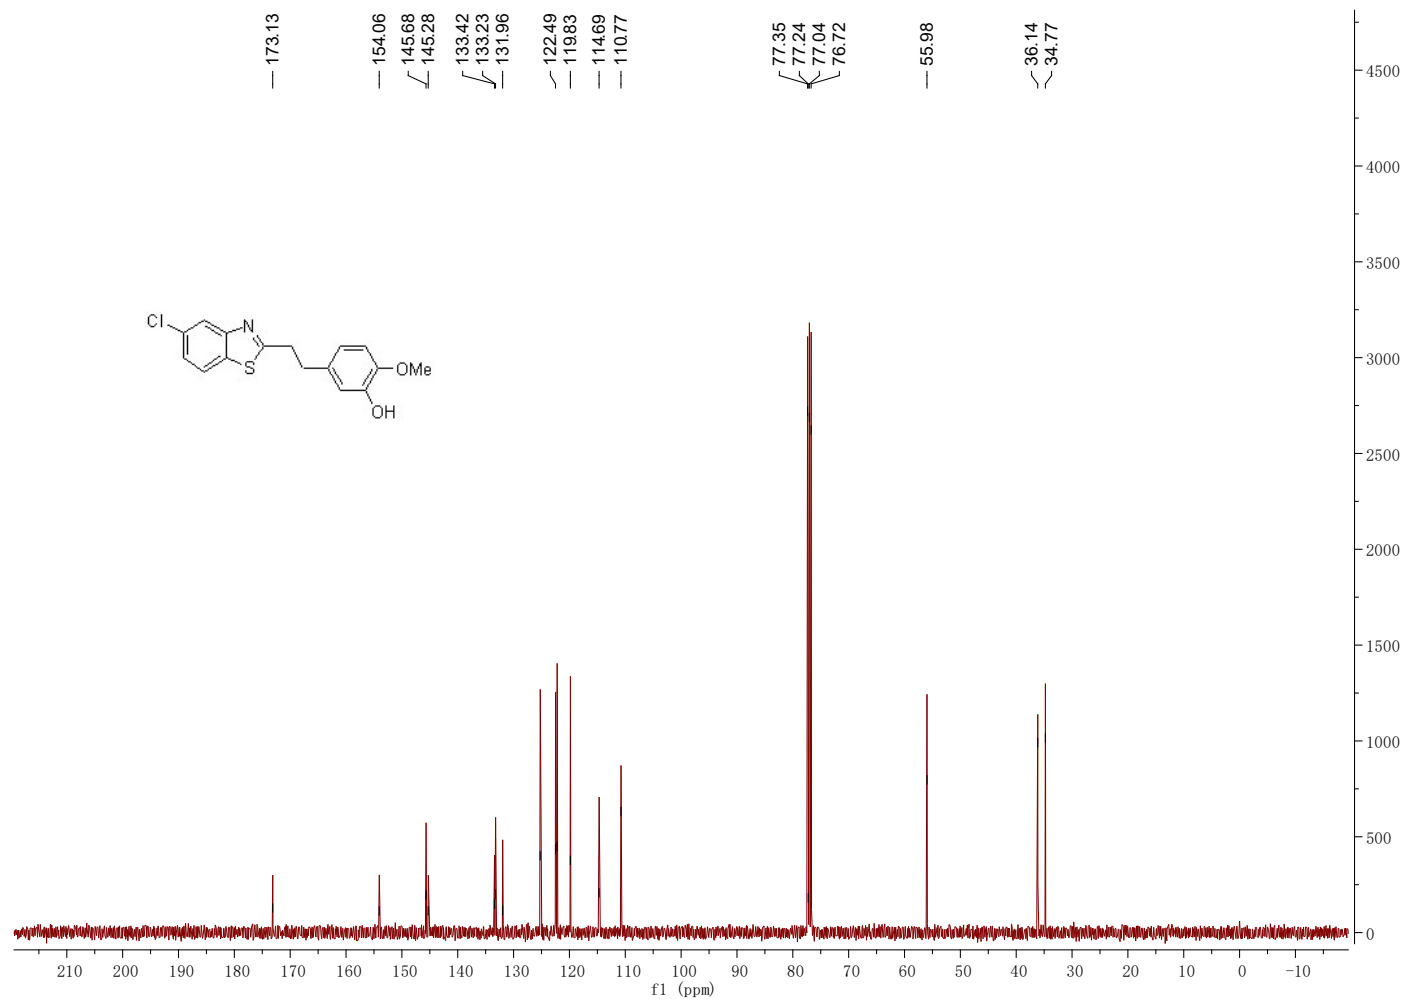



Figure S43. <sup>1</sup>H NMR of Compound 25

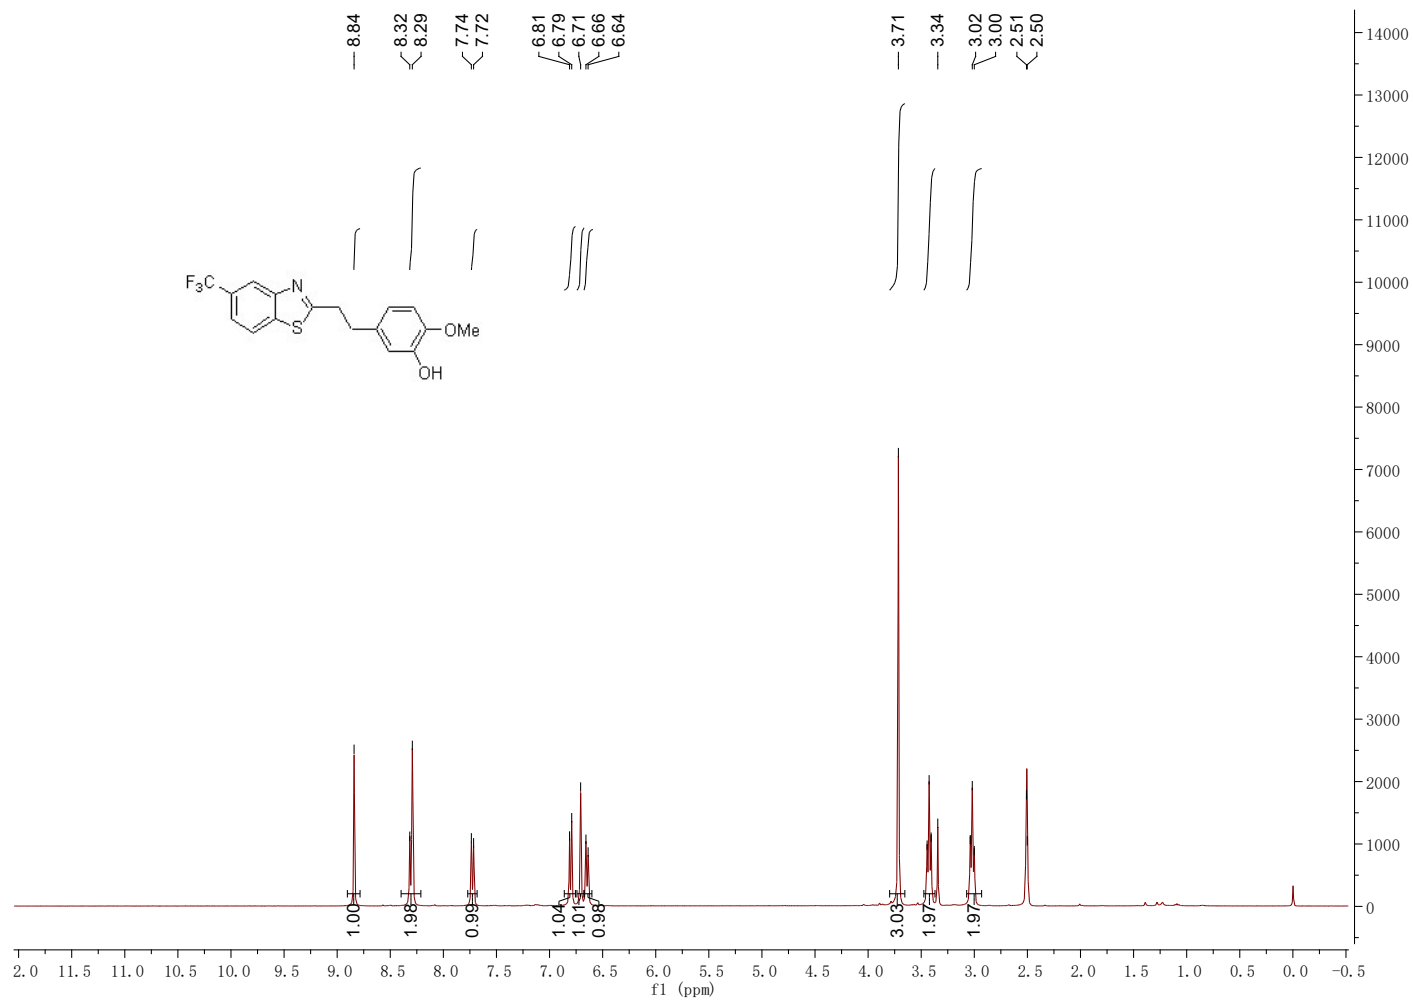

Figure S44.  $^{13}\text{C}$ -NMR of Compound 25

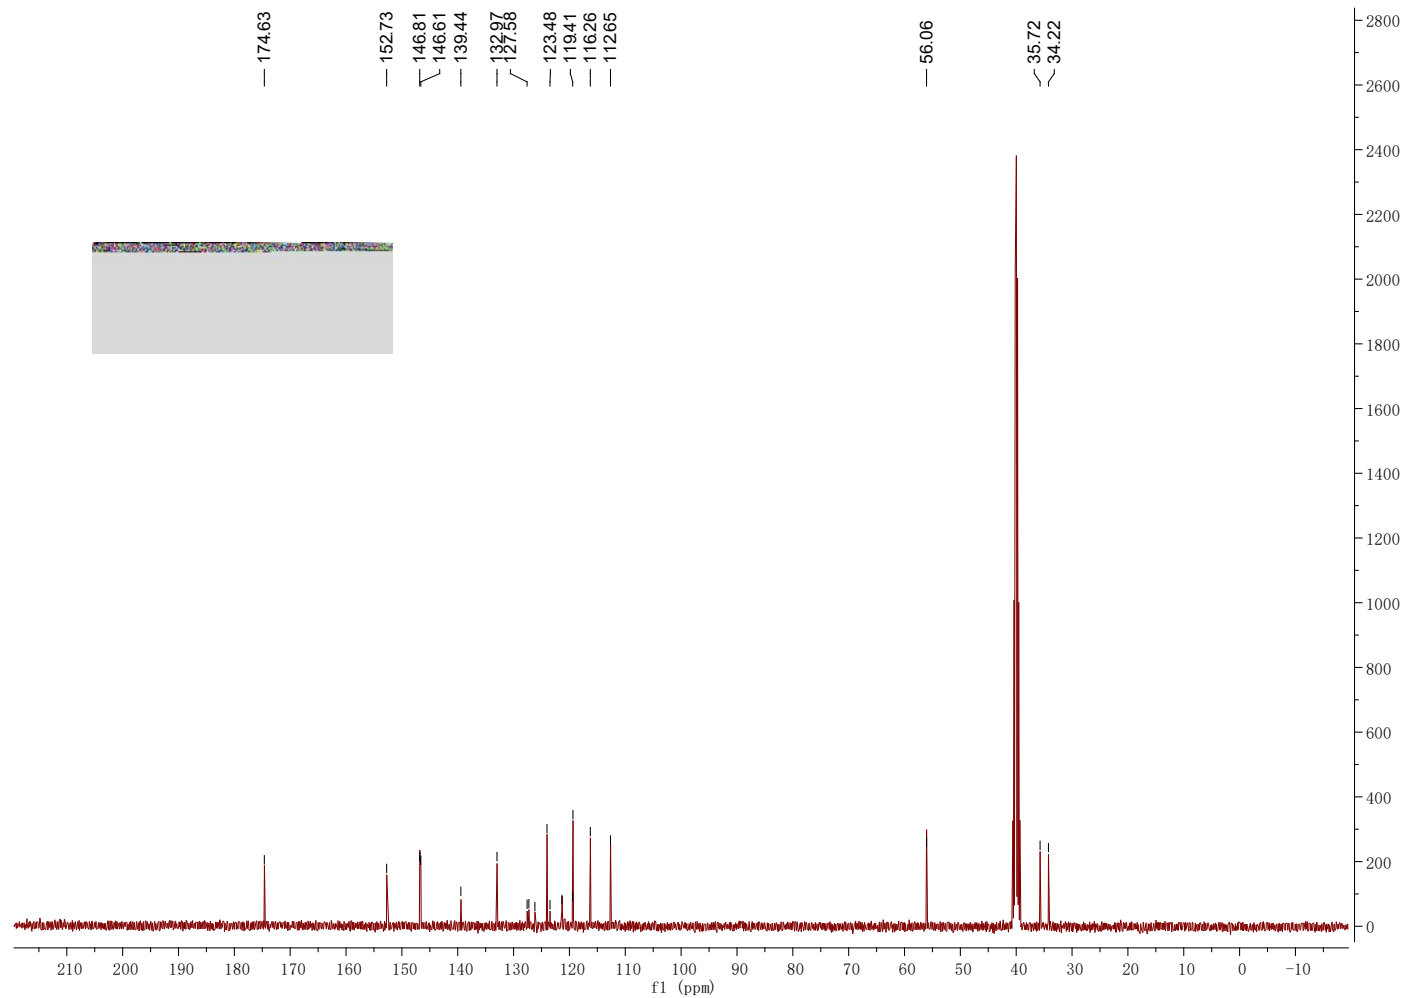

Figure S45 <sup>1</sup>H NMR of Compound 26

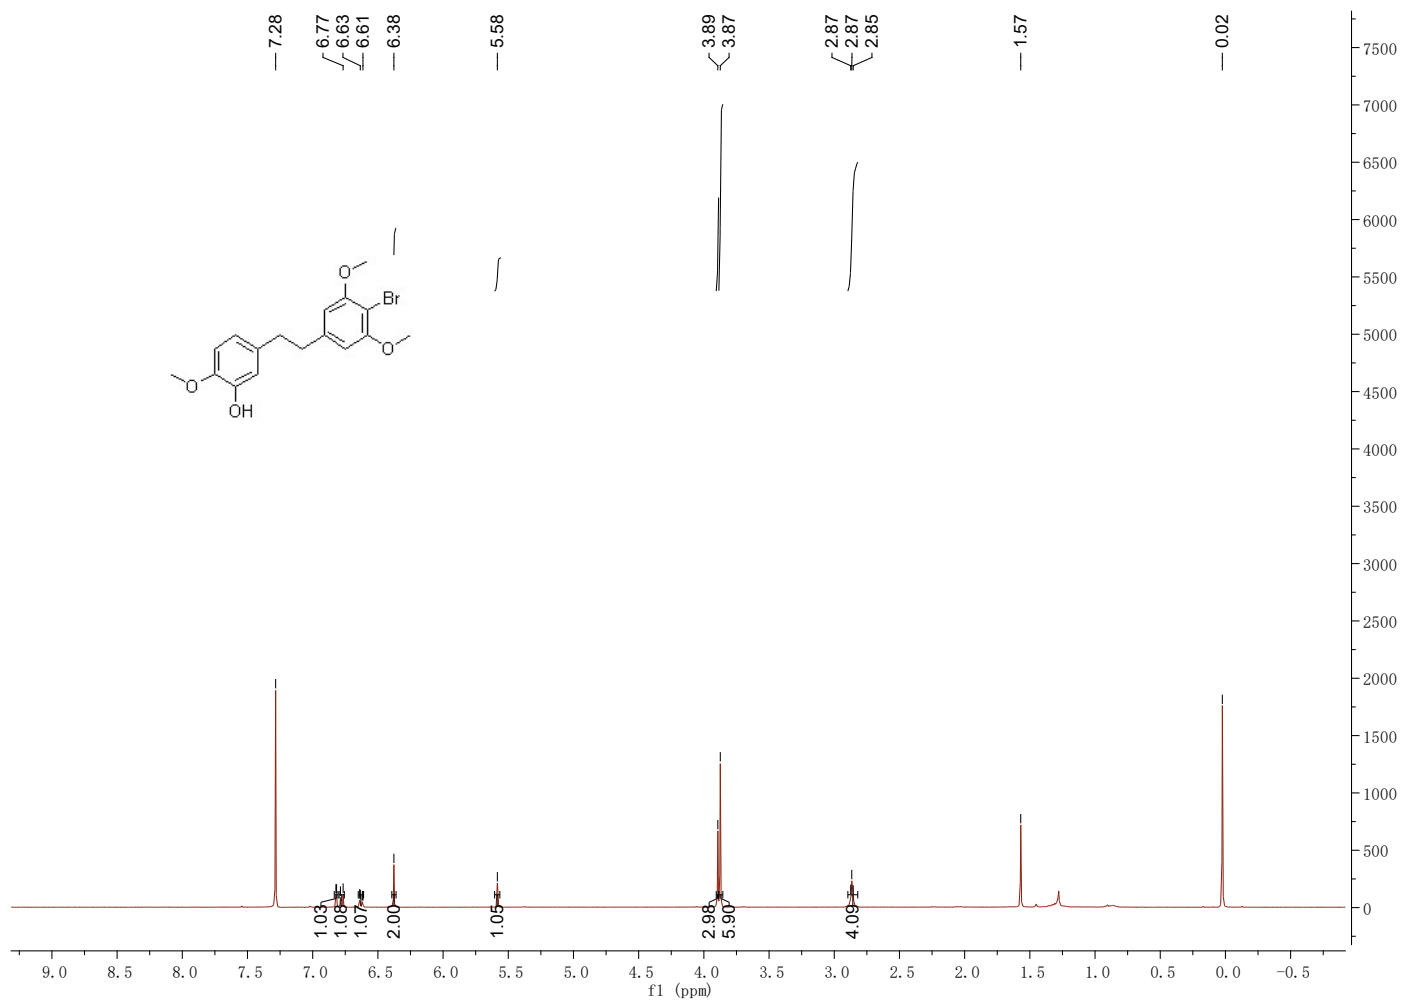

Figure S46.  $^{13}\text{C}$ -NMR of Compound 26

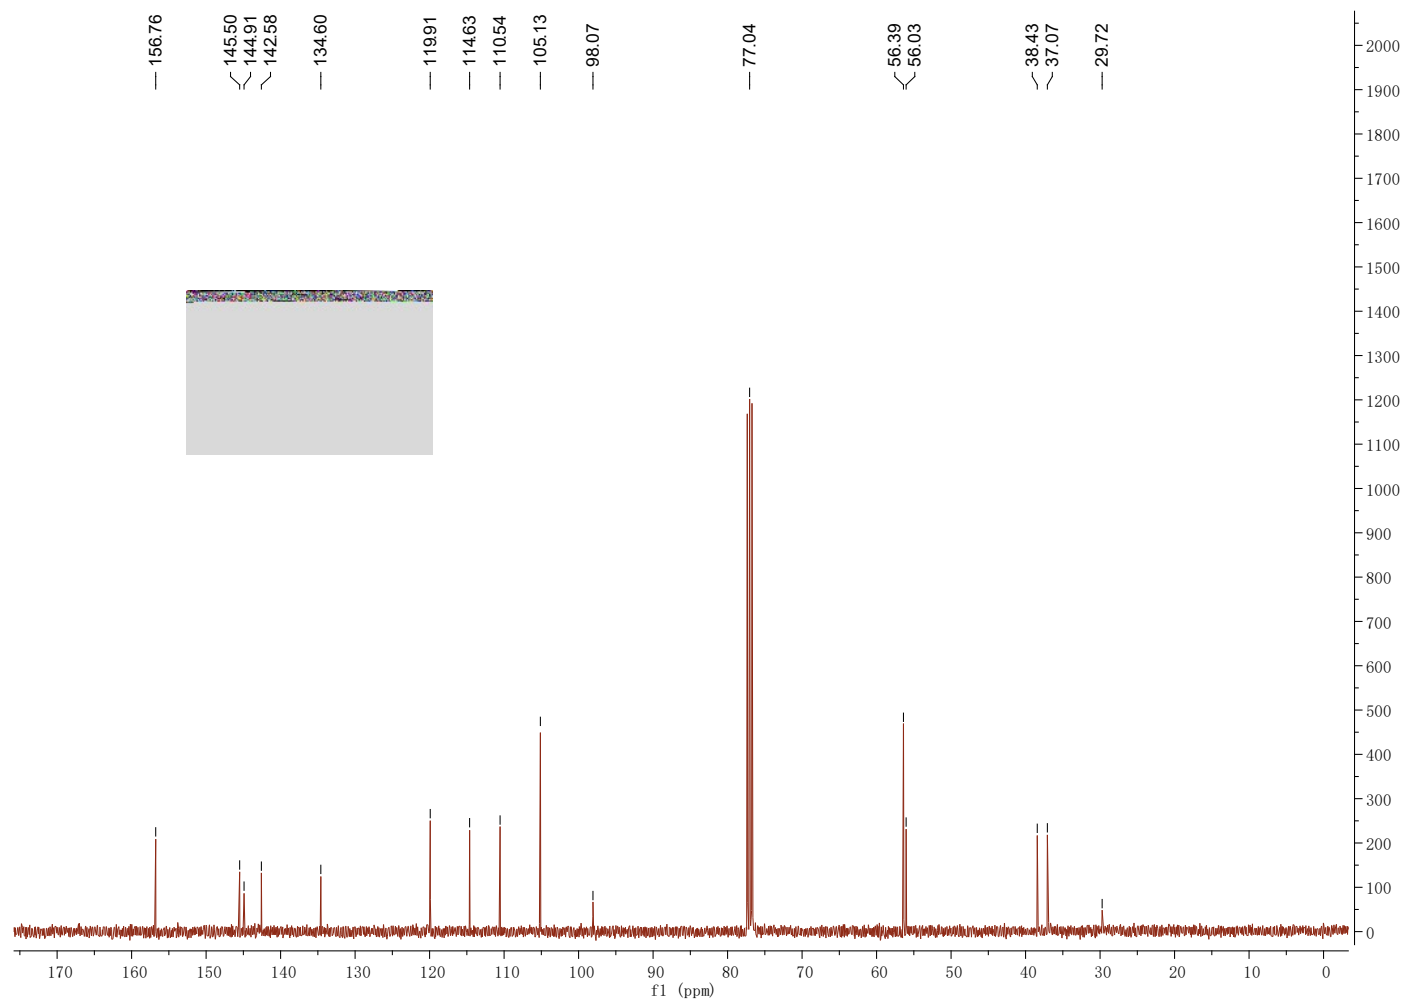

Figure S47. <sup>1</sup>H NMR of Compound 27

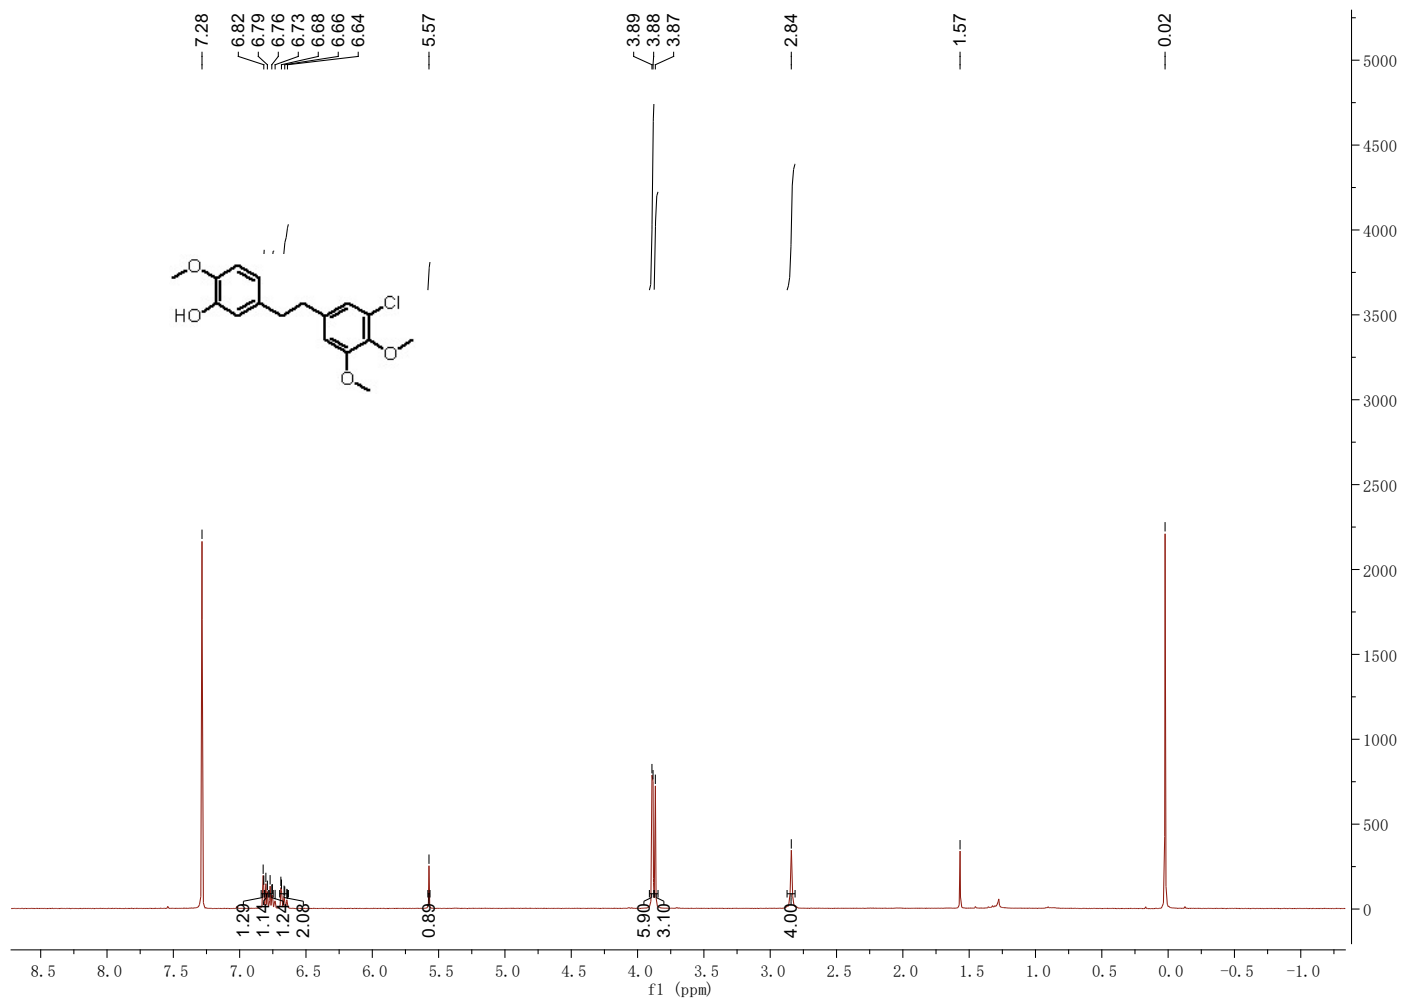

Figure S48. <sup>13</sup>C-NMR of Compound 27

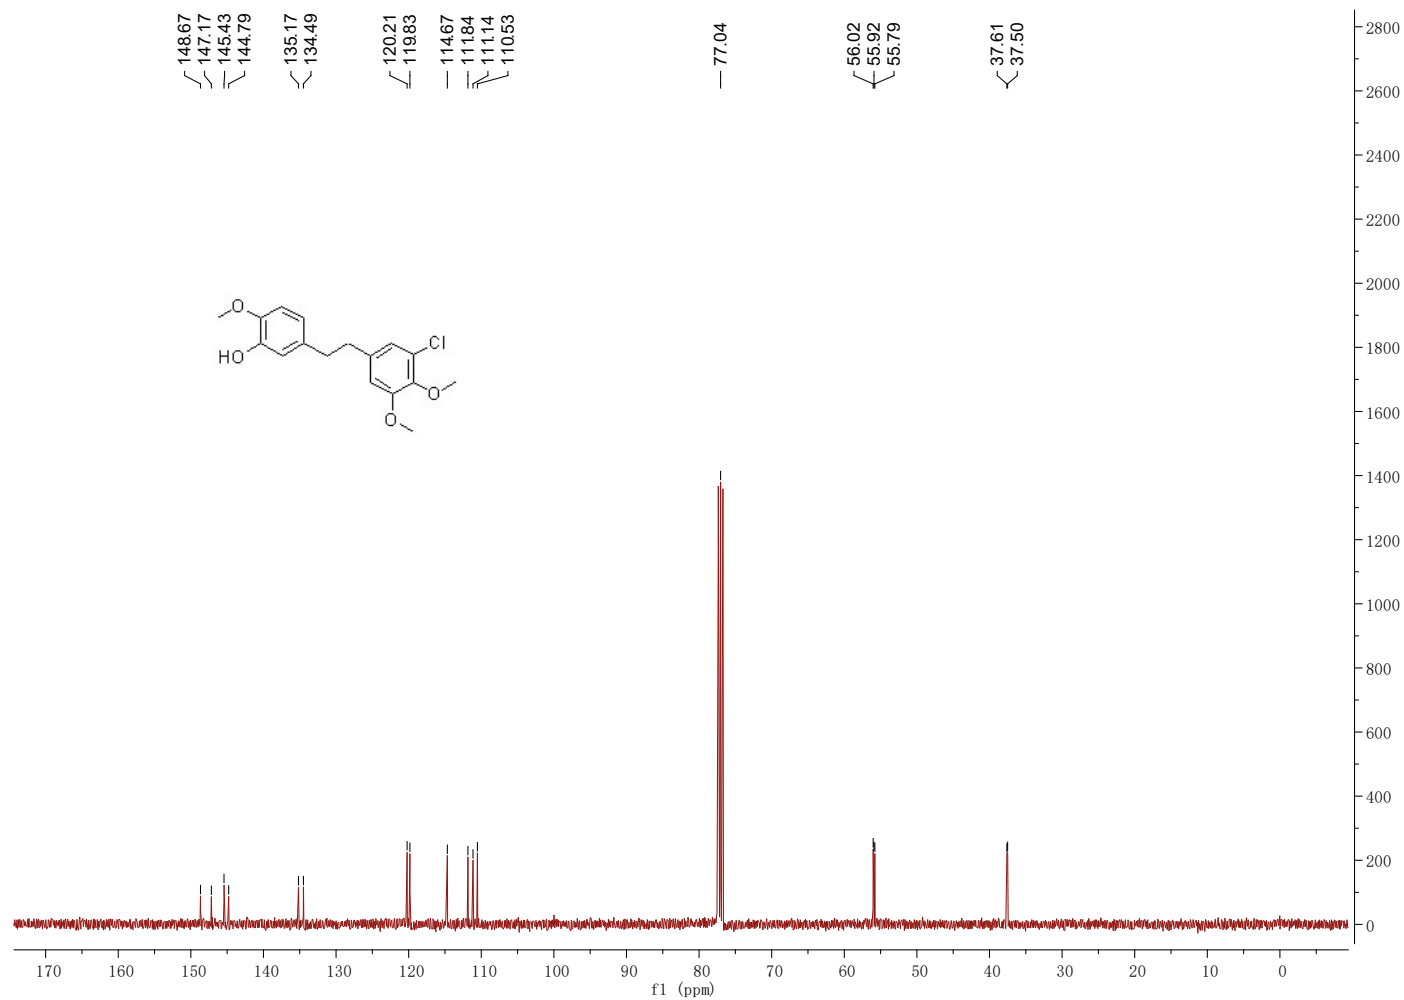

Figure S49. <sup>1</sup>H NMR of Compound 28

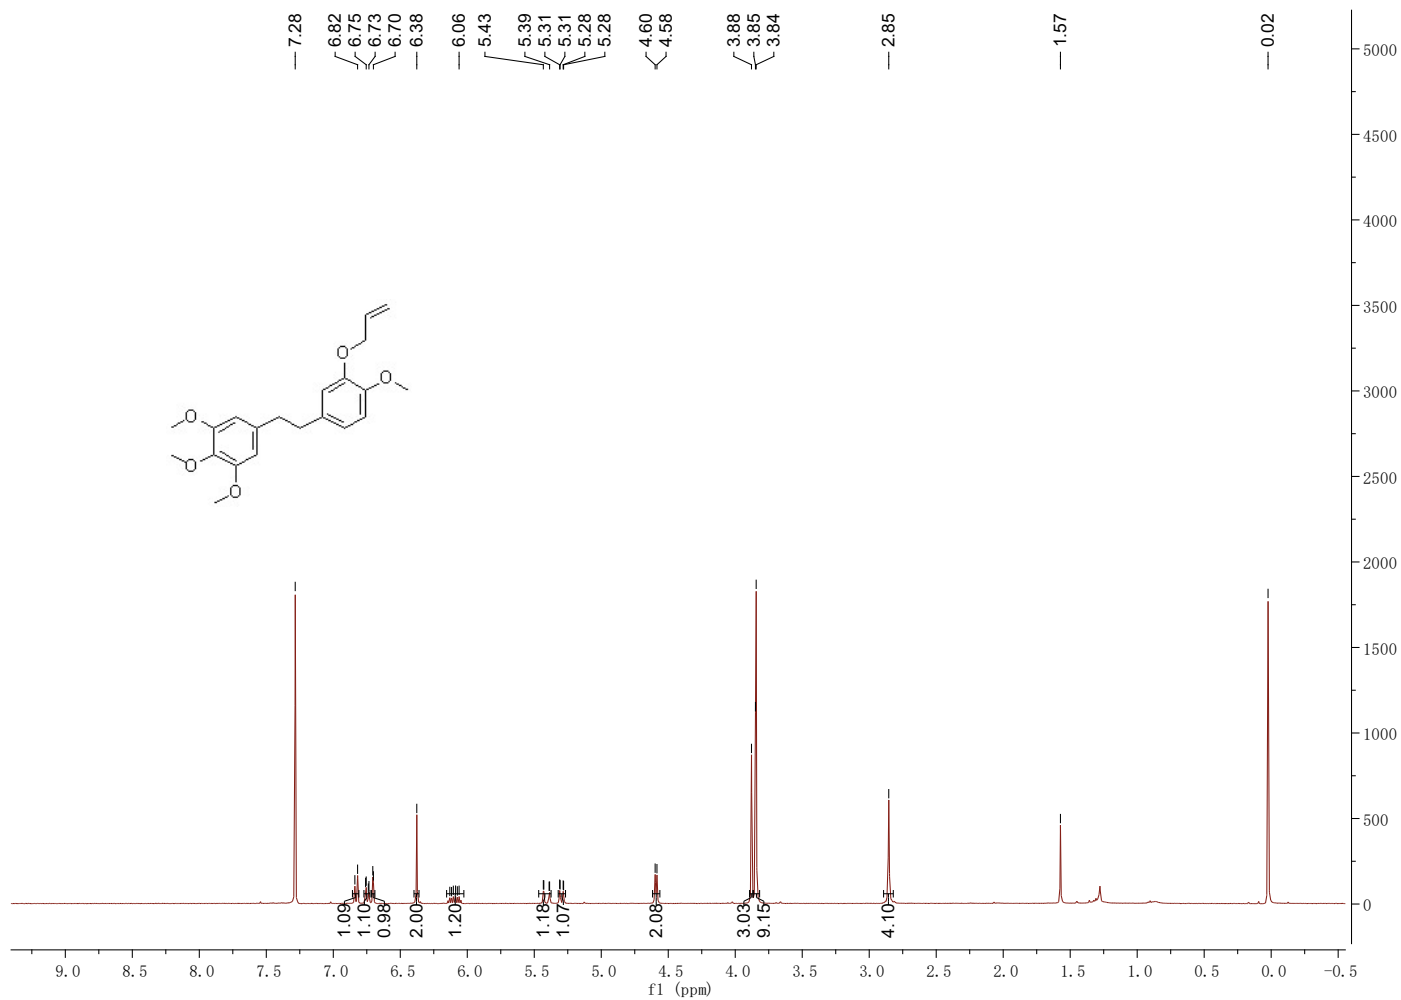

Figure S50 <sup>13</sup>C-NMR of Compound 28

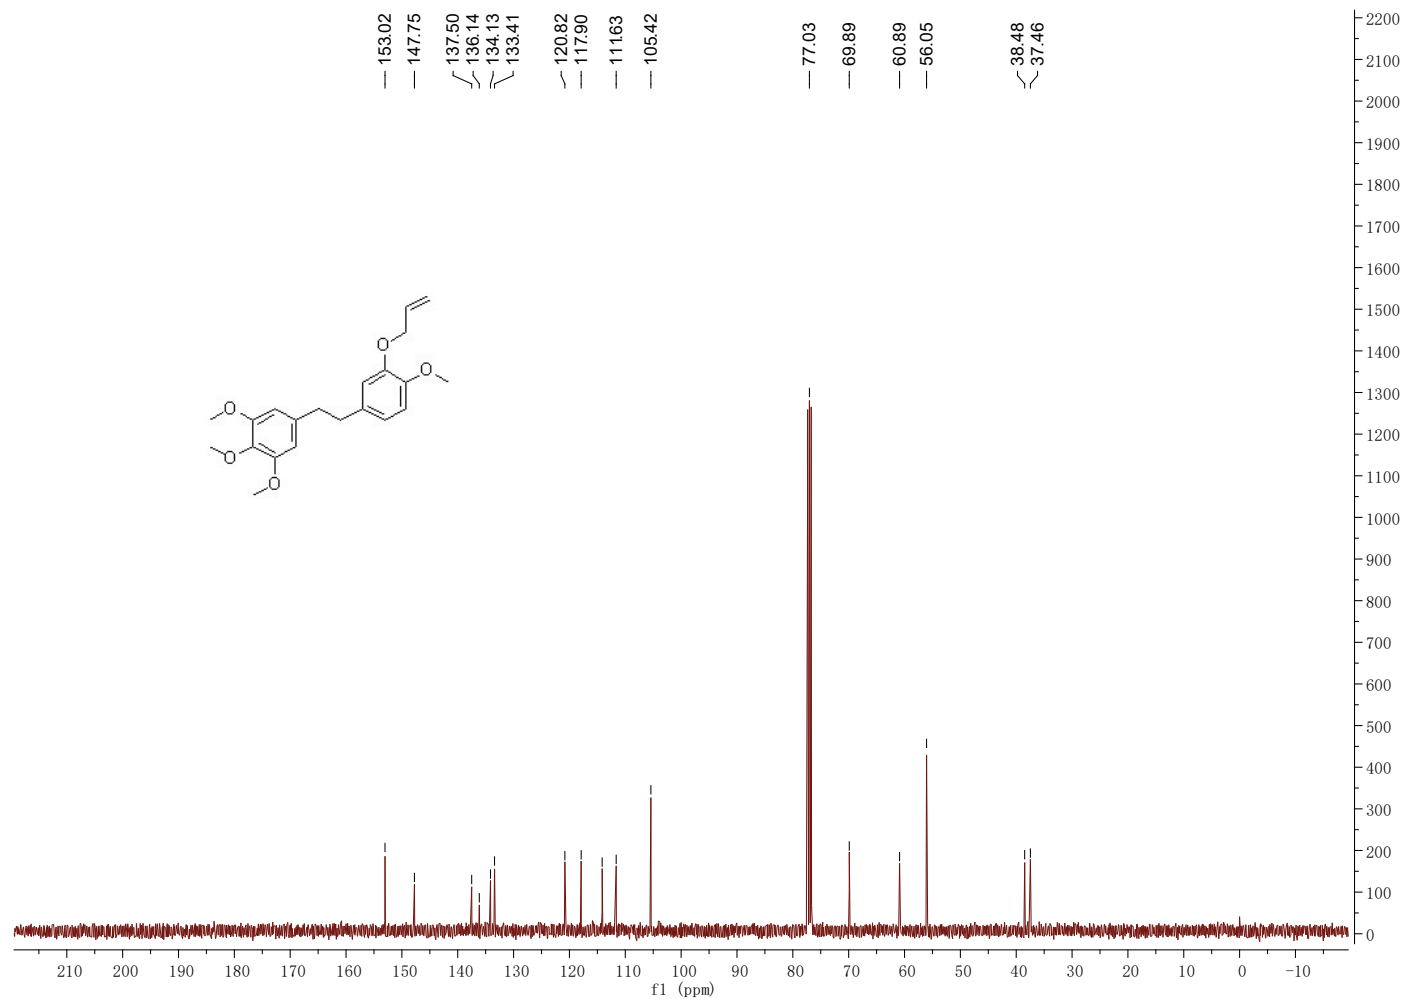



Figure S51. <sup>1</sup>H NMR of Compound 29

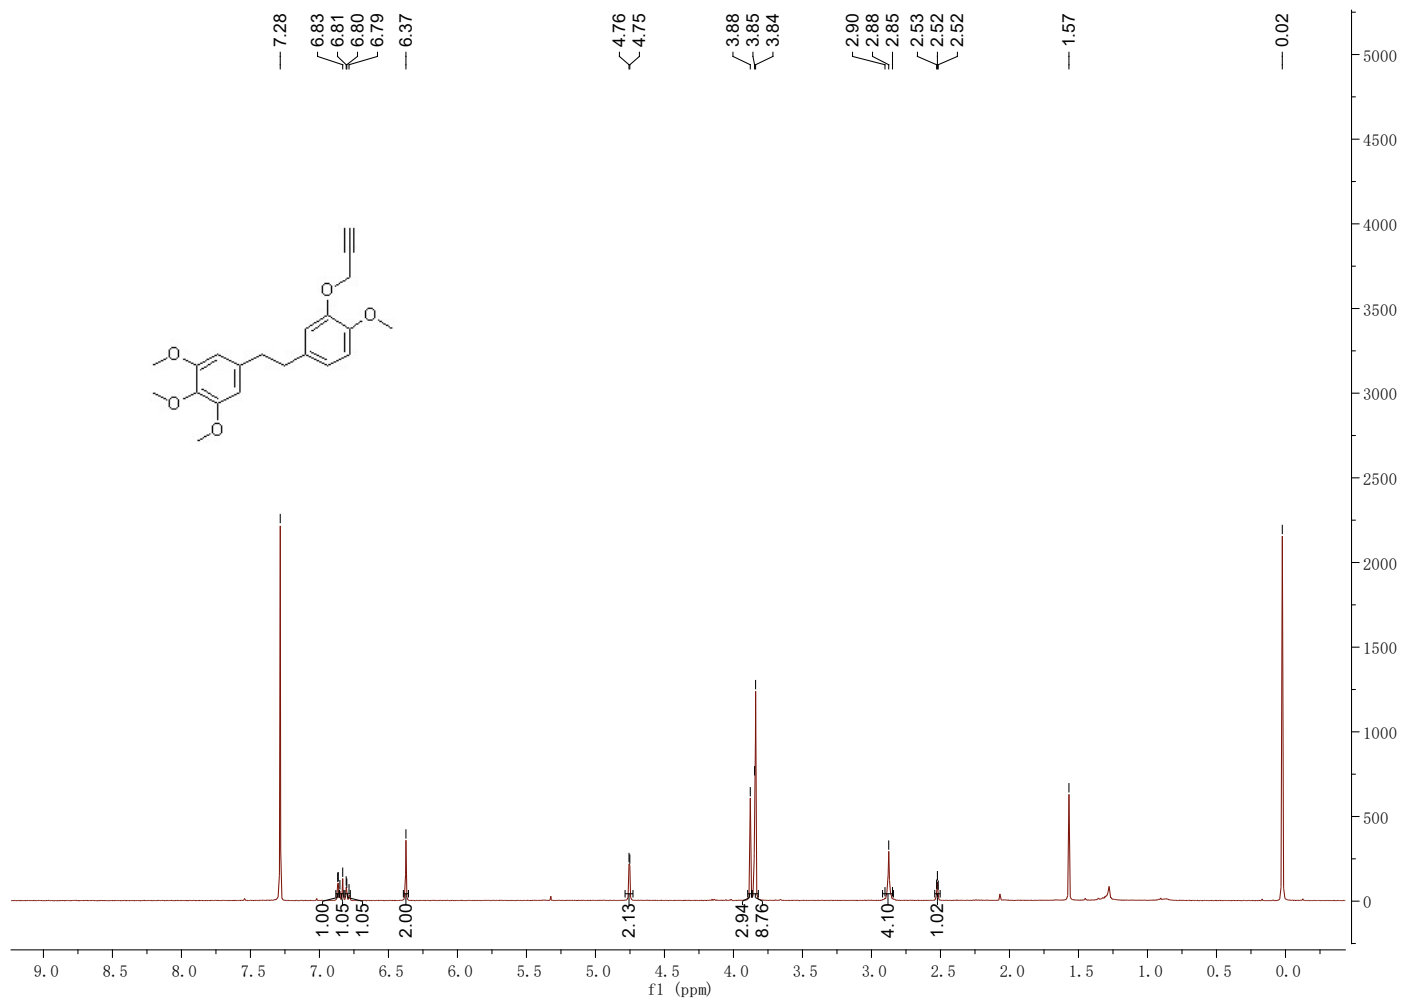

Figure S52. <sup>13</sup>C-NMR of Compound 29

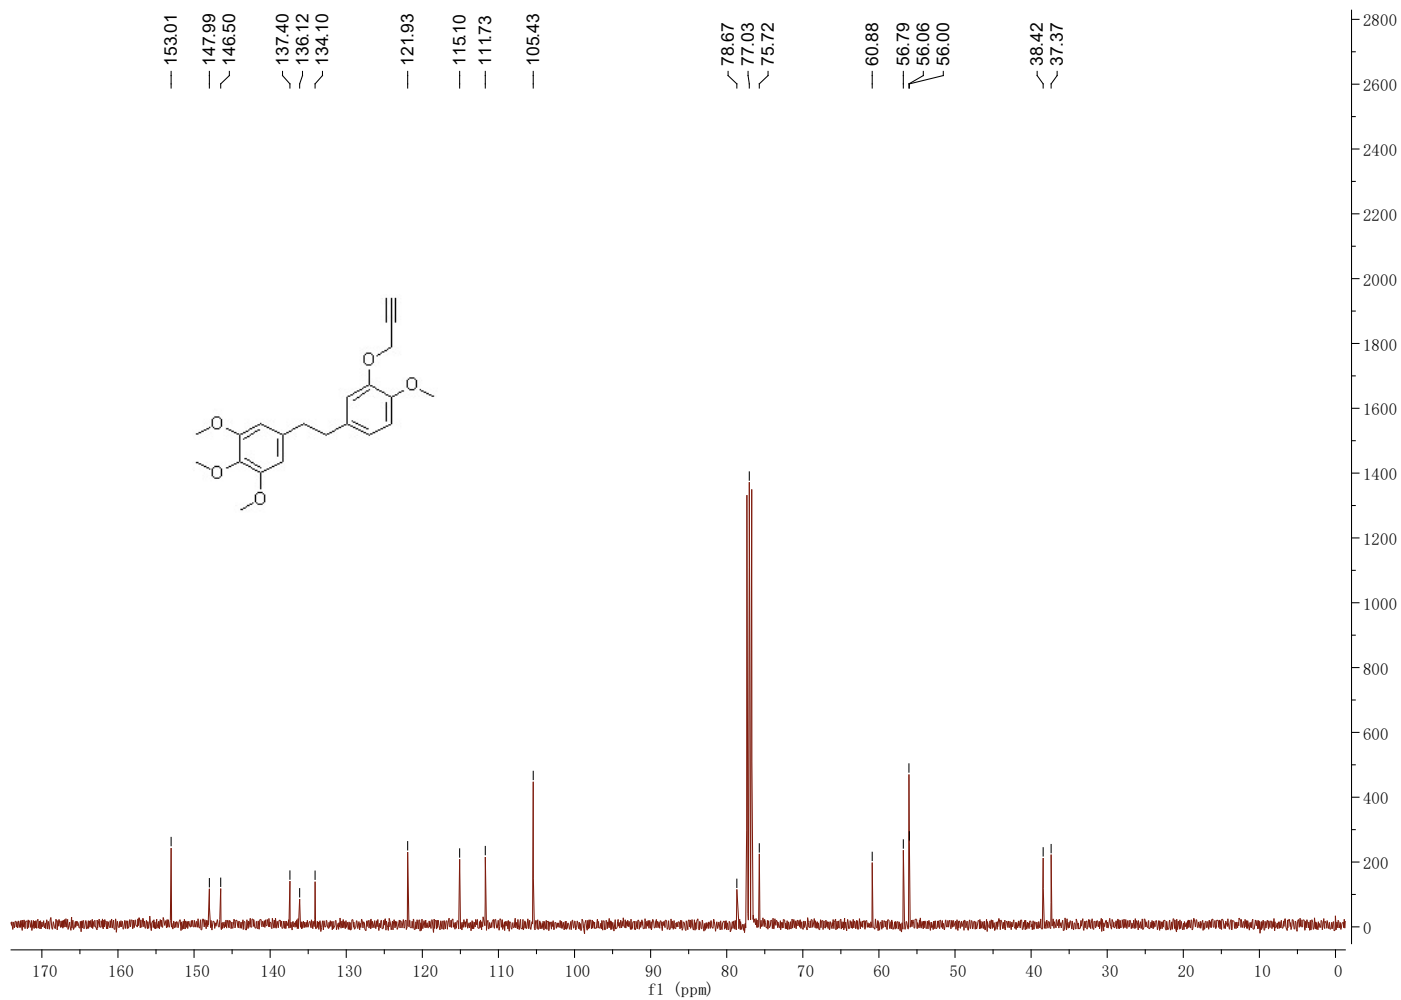

Figure S53. <sup>1</sup>H NMR of Compound 30

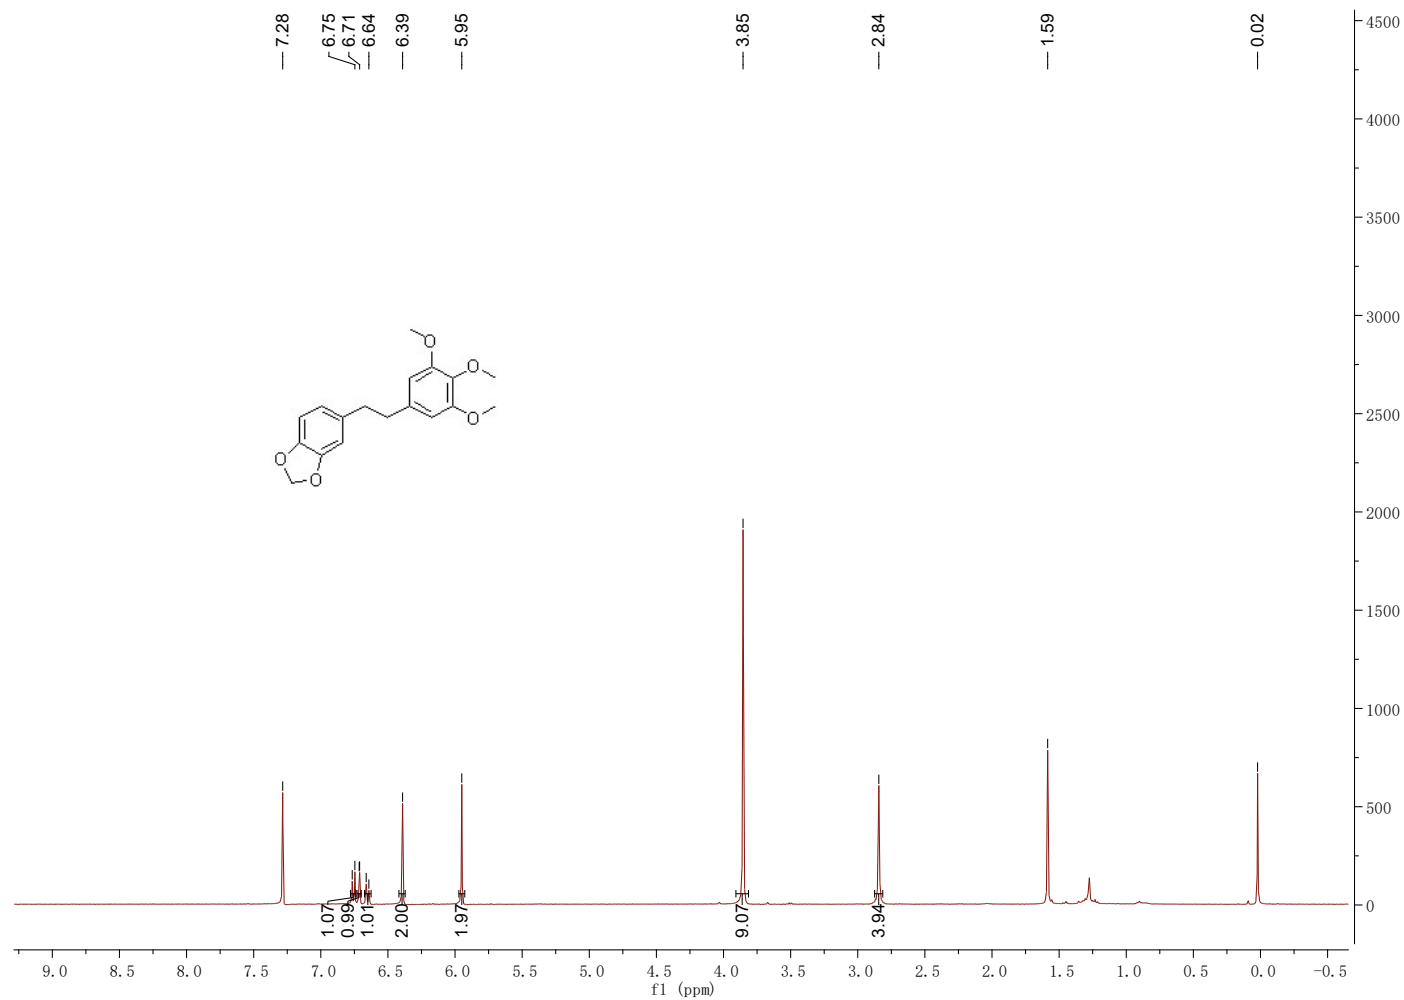

Figure S54.  $^{13}\text{C}$ -NMR of Compound 30

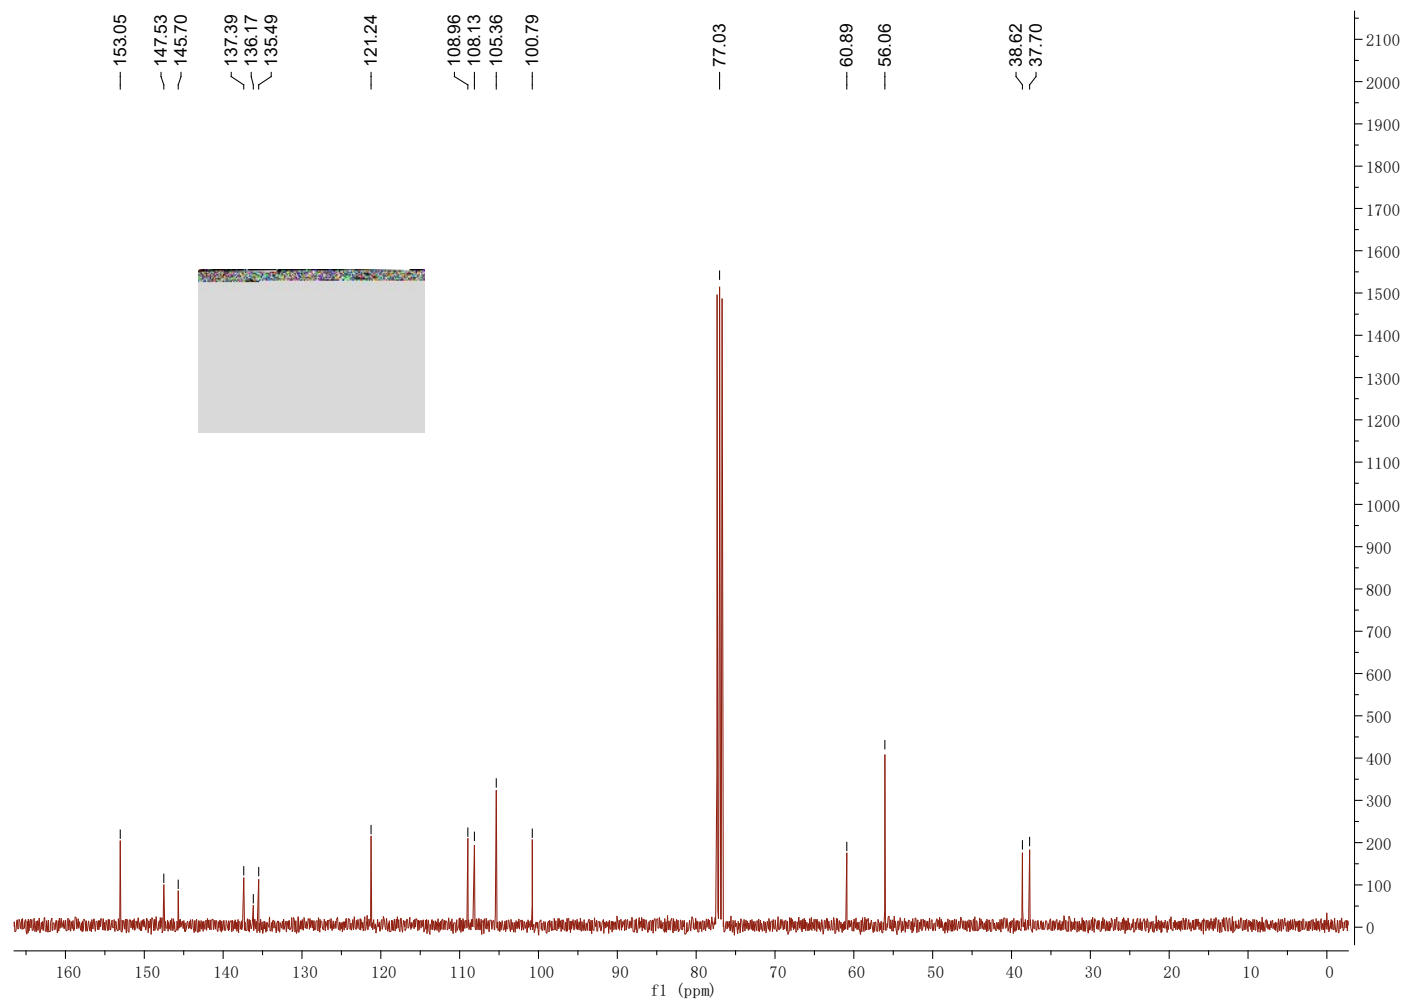

Figure S55. <sup>1</sup>H NMR of Compound 31

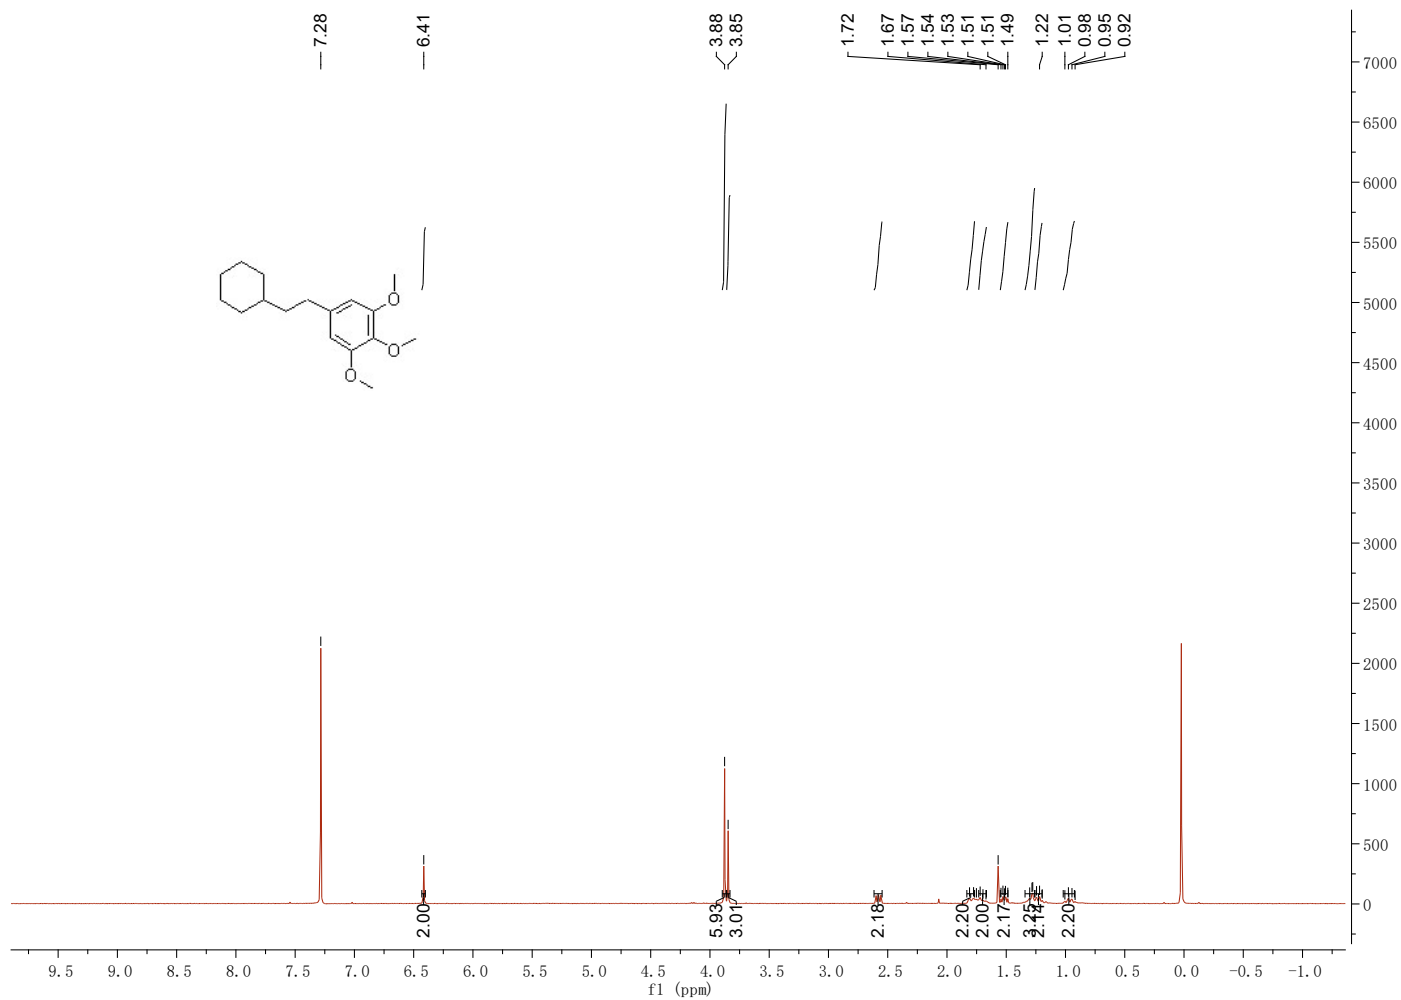

Figure S56.  $^{13}\text{C}$ -NMR of Compound 31

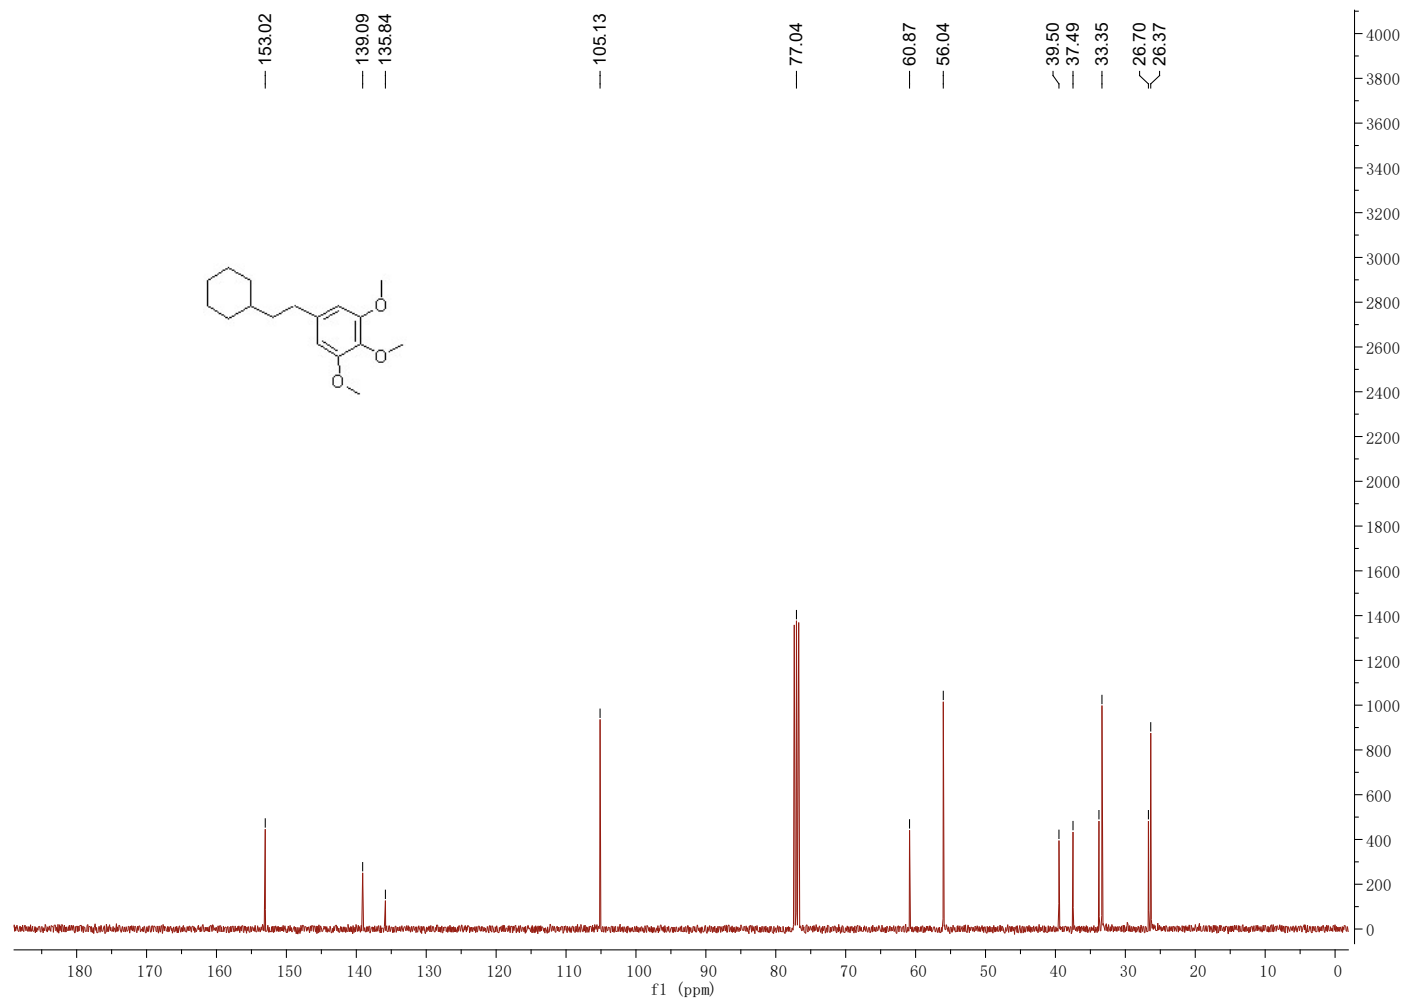

Figure S57. <sup>1</sup>H NMR of Compound 32

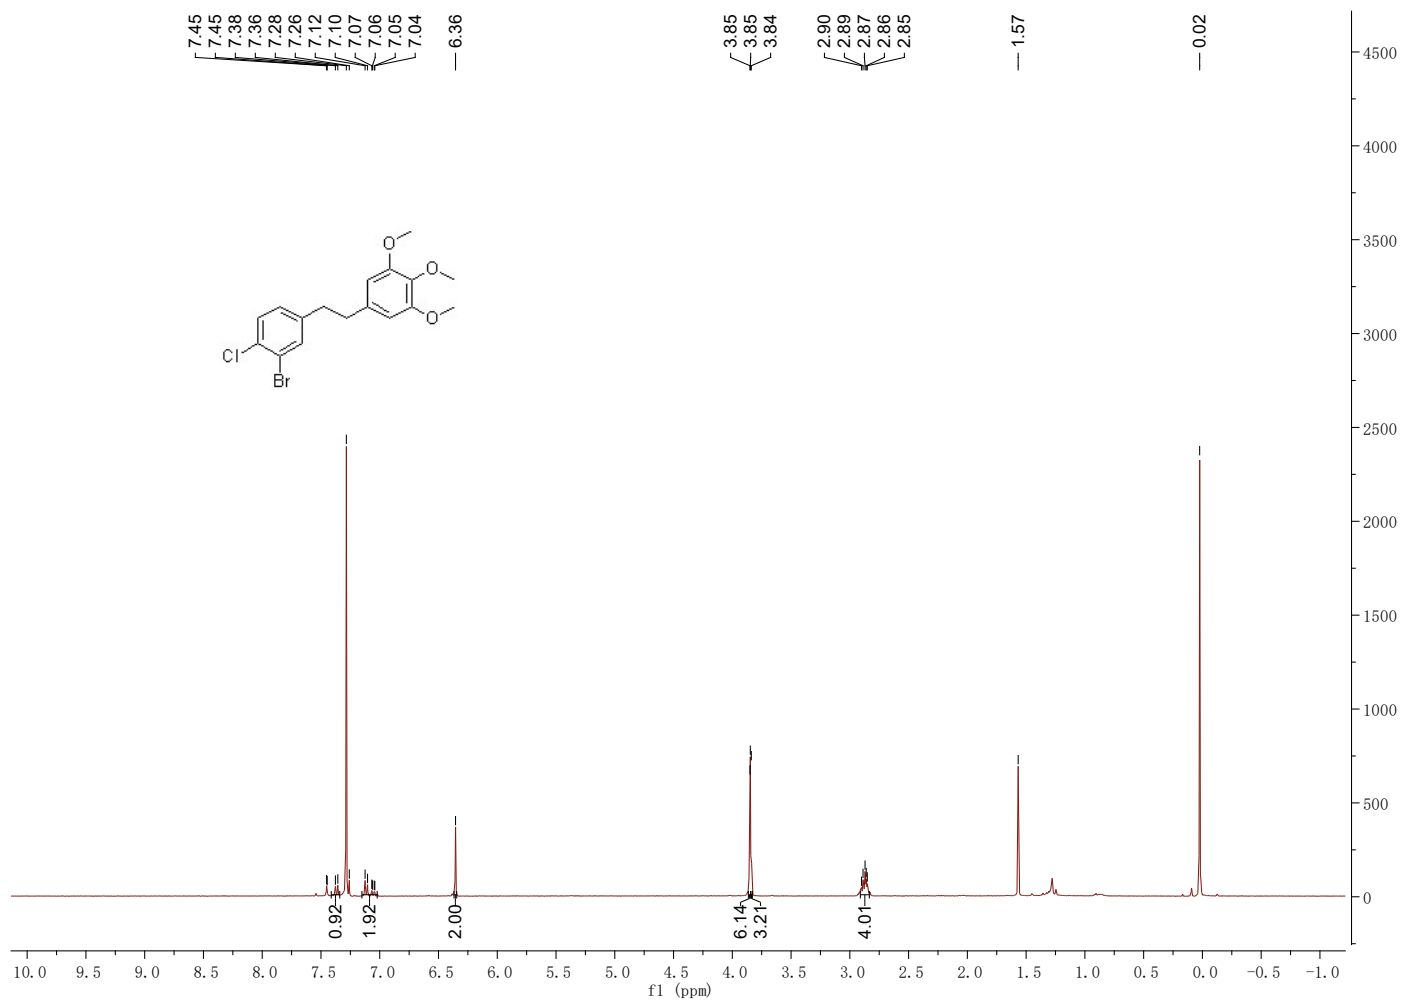

Figure S58.  $^{13}\text{C}$ -NMR of Compound 32

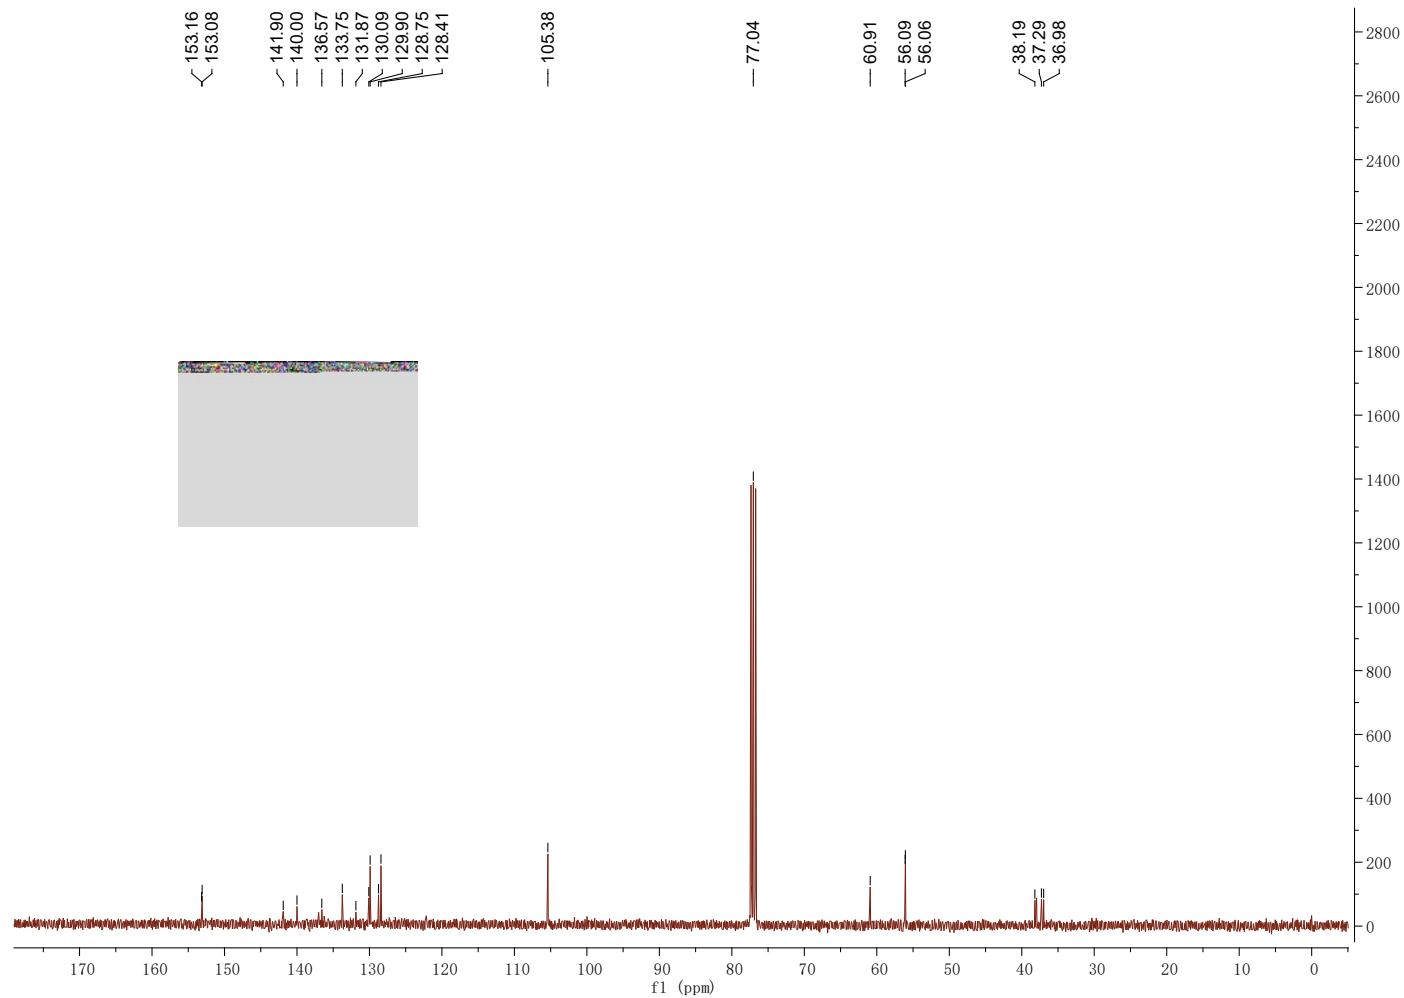



Figure S59. <sup>1</sup>H NMR of Compound 33

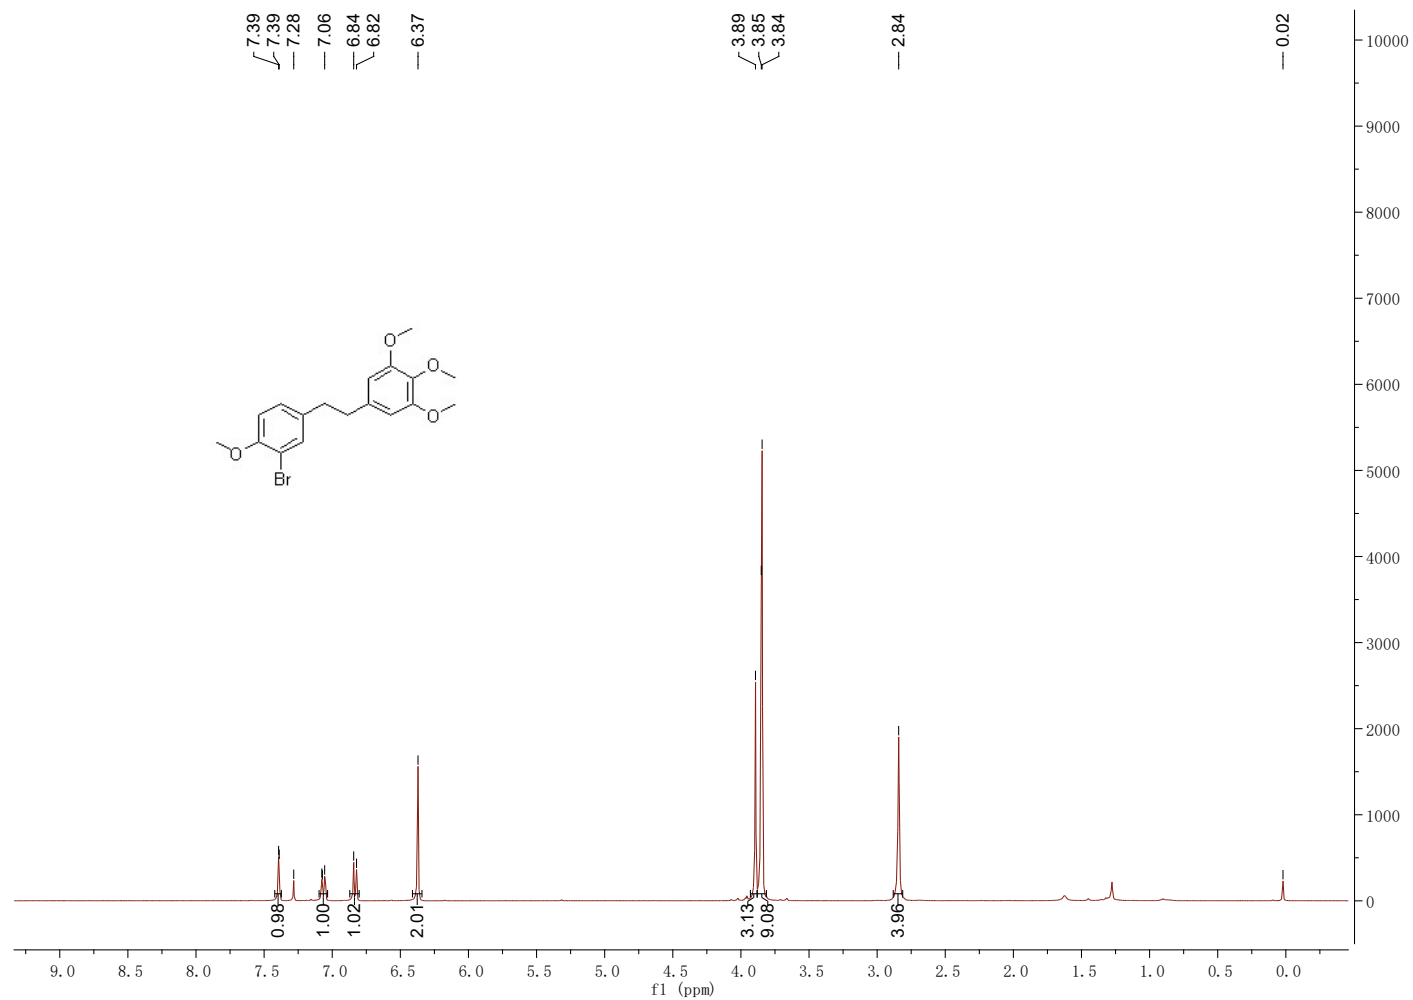

Figure S60.  $^{13}\text{C}$ -NMR of Compound 33

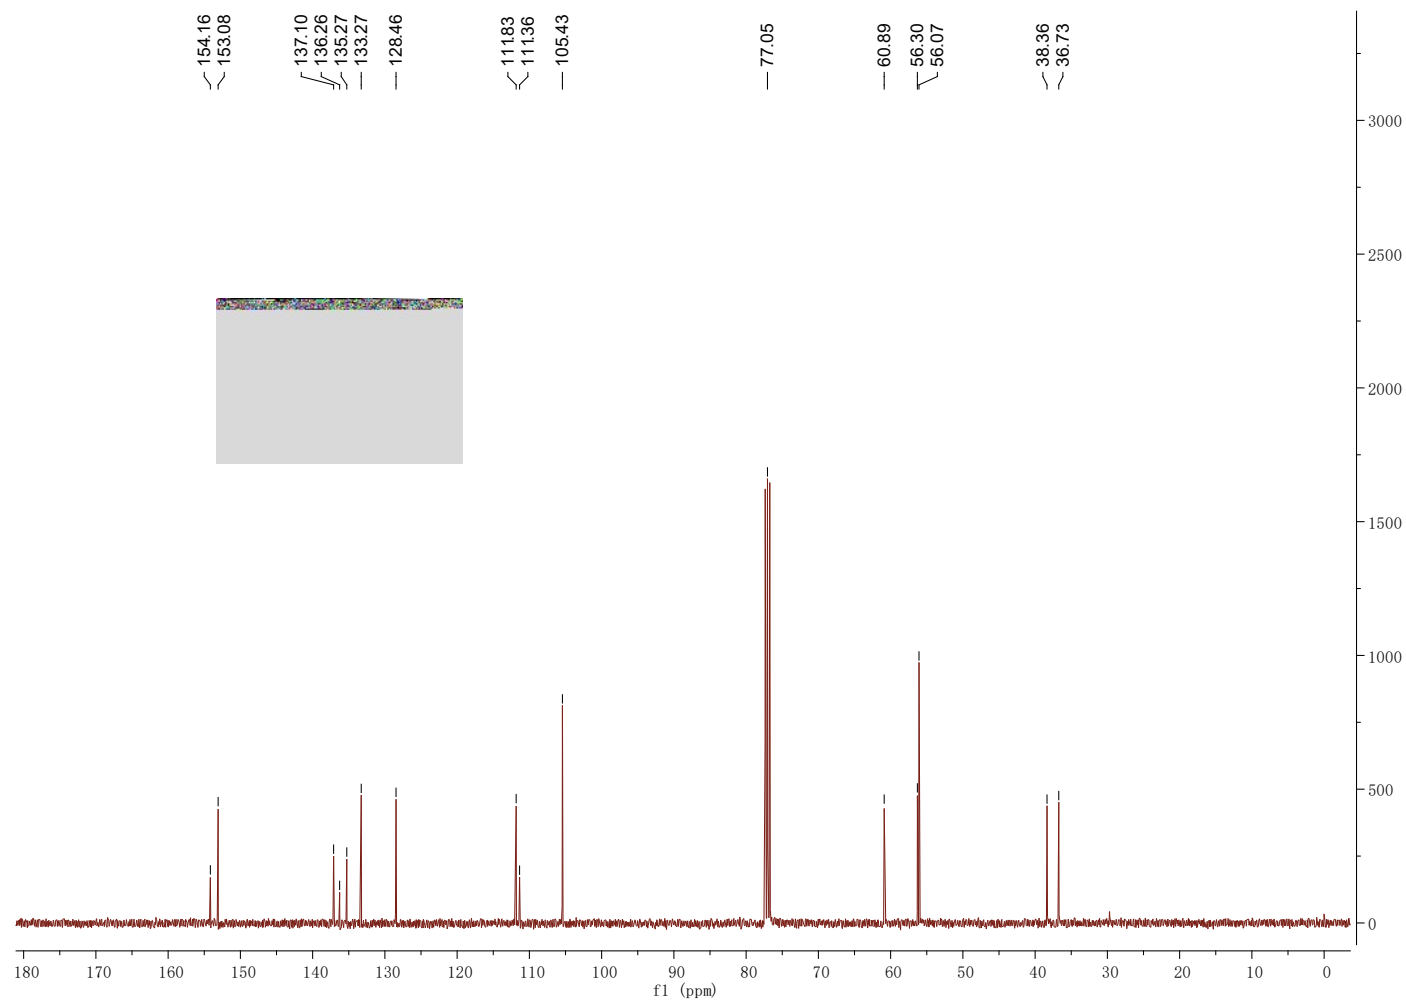

Figure S61. <sup>1</sup>H NMR of Compound 34

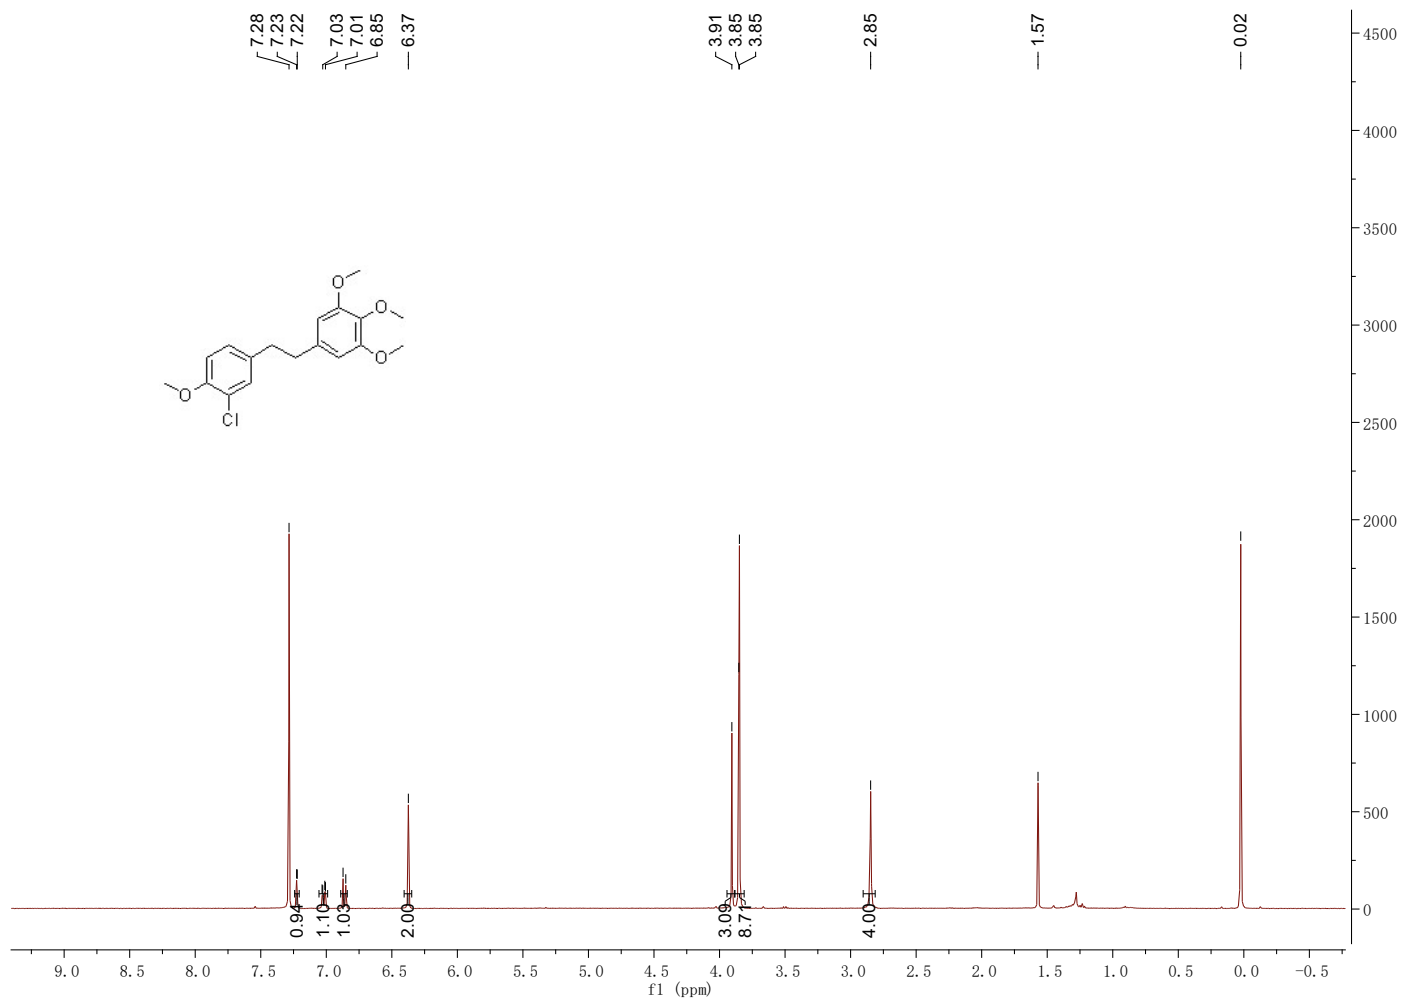

Figure S62.  $^{13}\text{C}$ -NMR of Compound 34

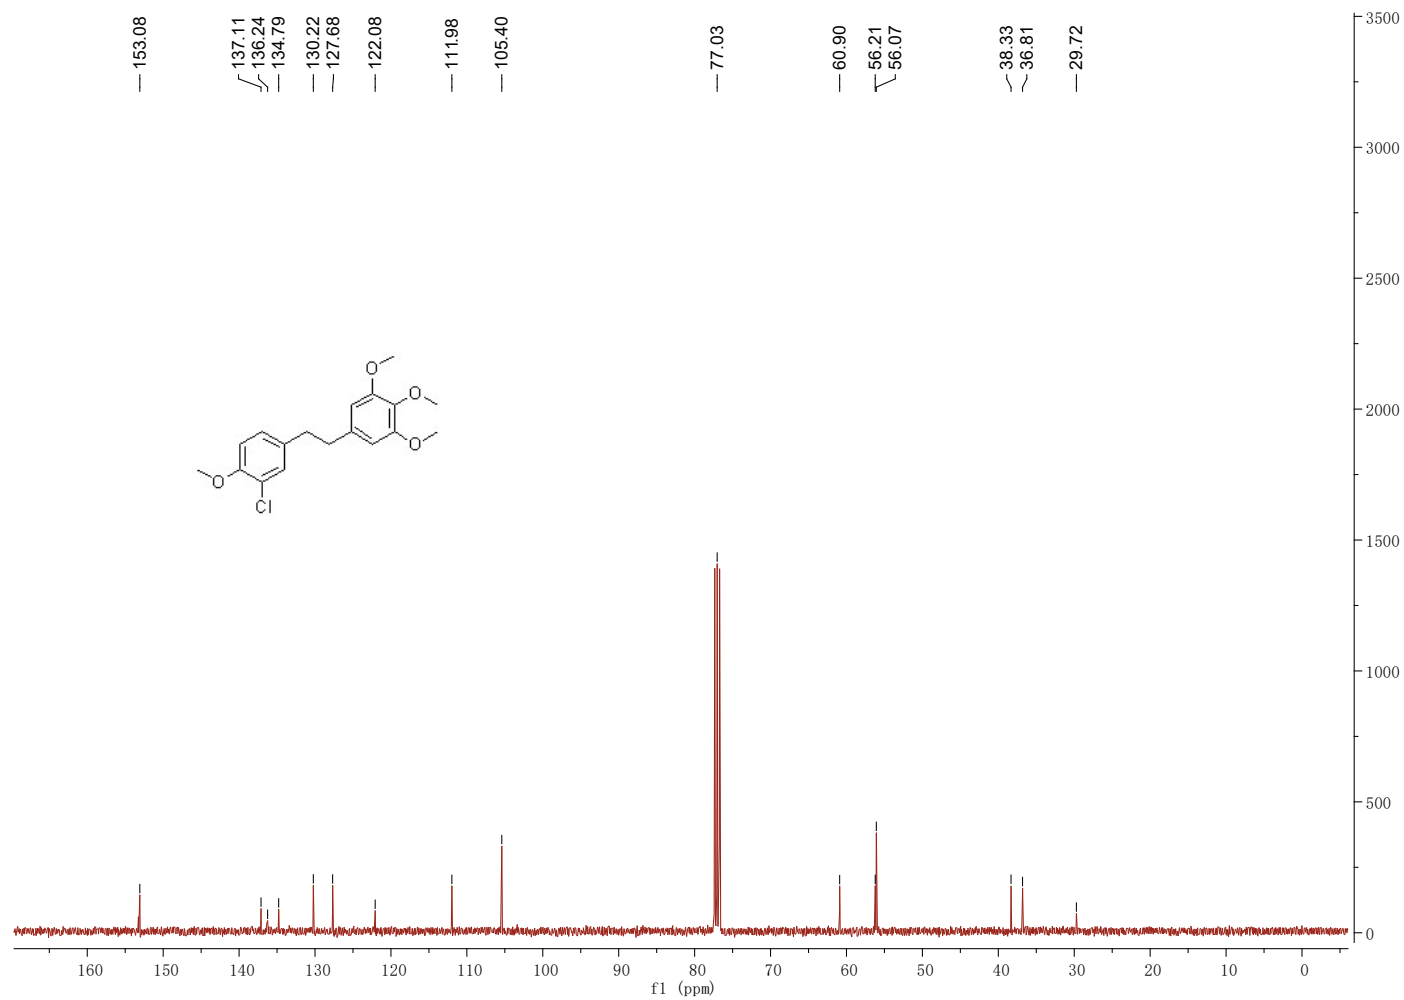

Figure S63. <sup>1</sup>H NMR of Compound 35

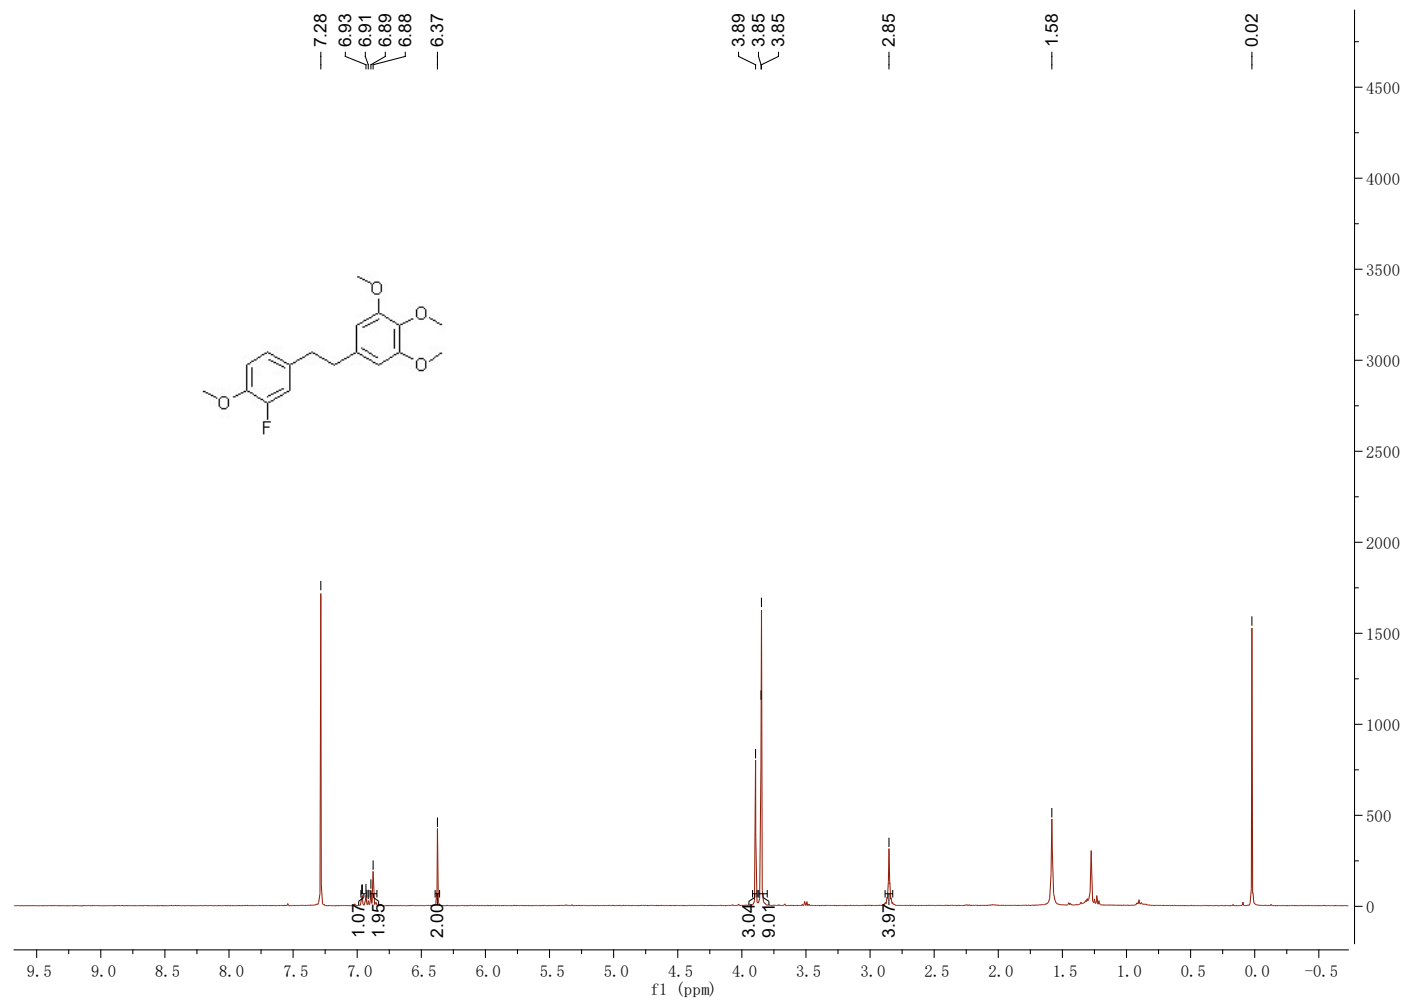

Figure S64.  $^{13}\text{C}$ -NMR of Compound 35

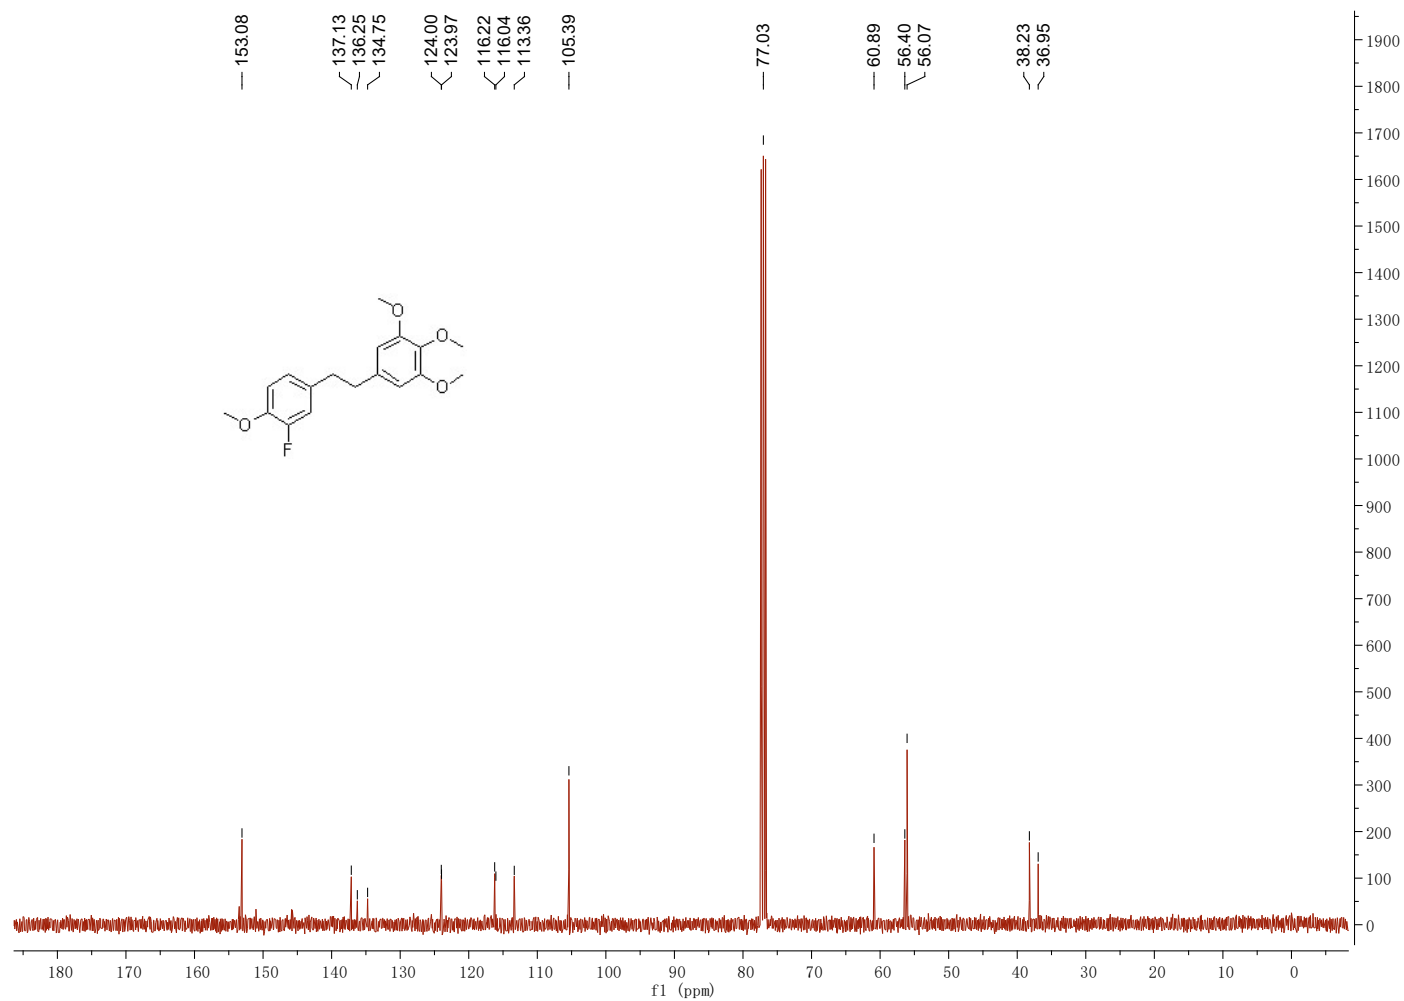

Figure S65. <sup>1</sup>H NMR of Compound 36

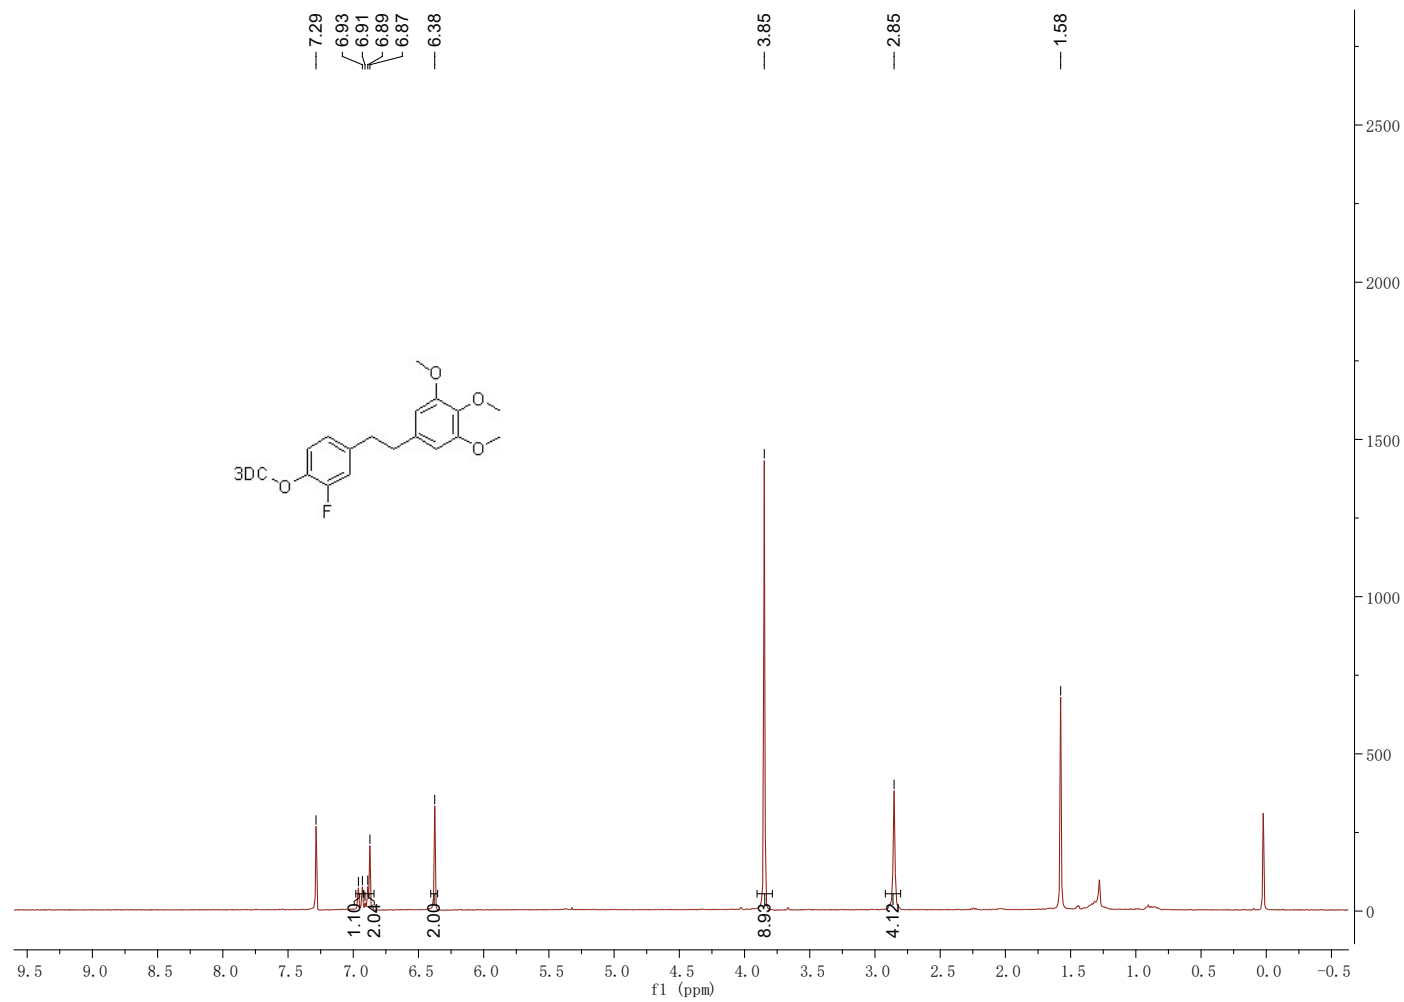

Figure S66. <sup>13</sup>C-NMR of Compound 36

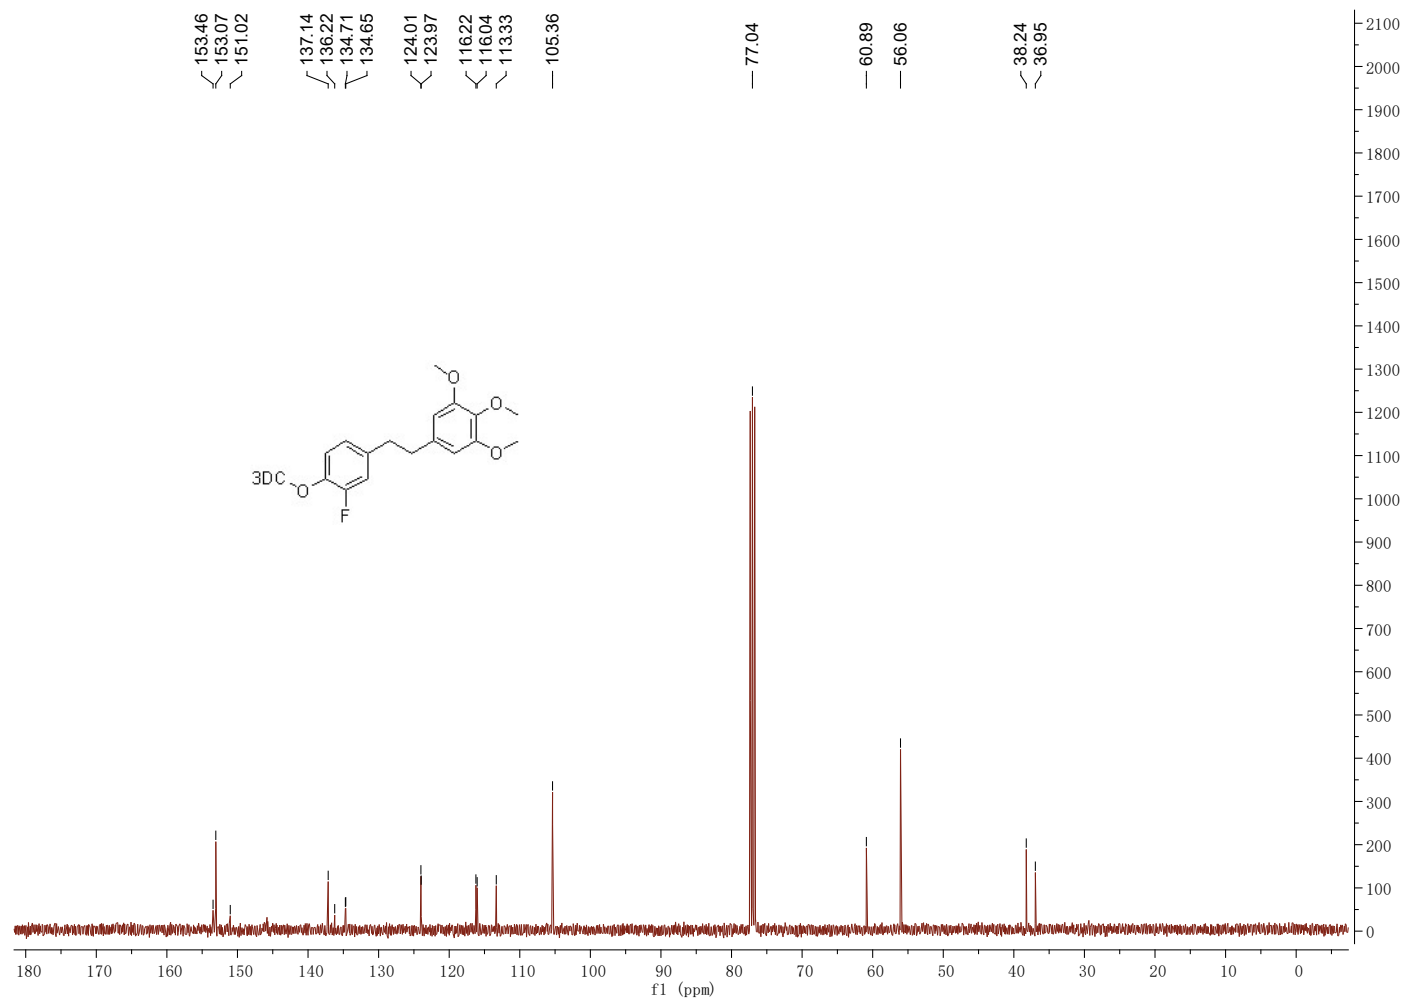



Figure S67. <sup>1</sup>H NMR of Compound 37

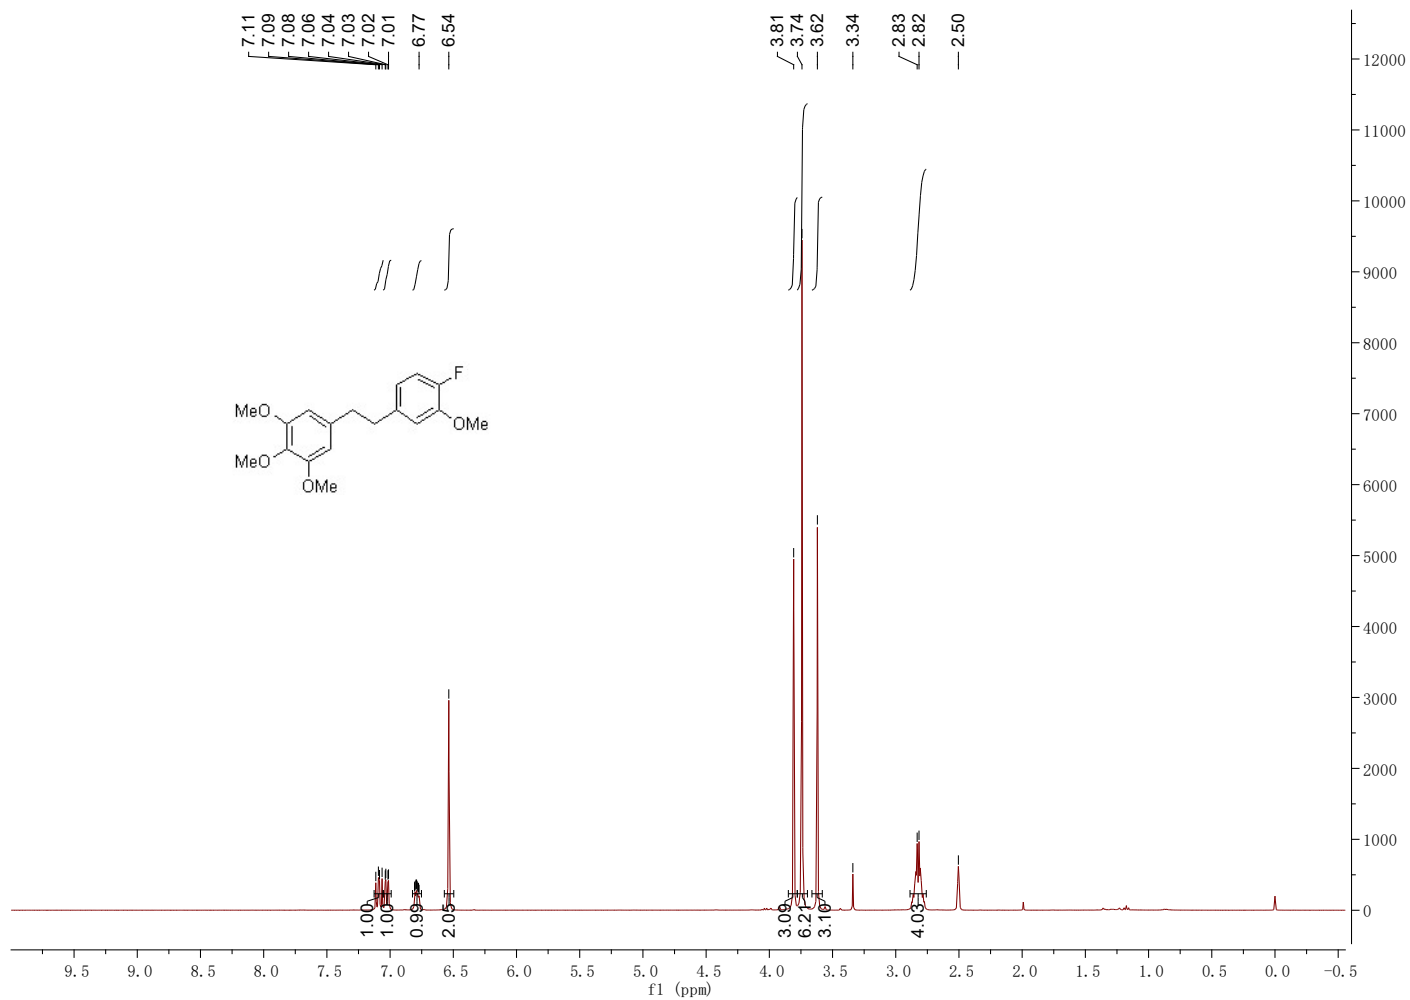

Figure S68.  $^{13}\text{C}$ -NMR of Compound 37

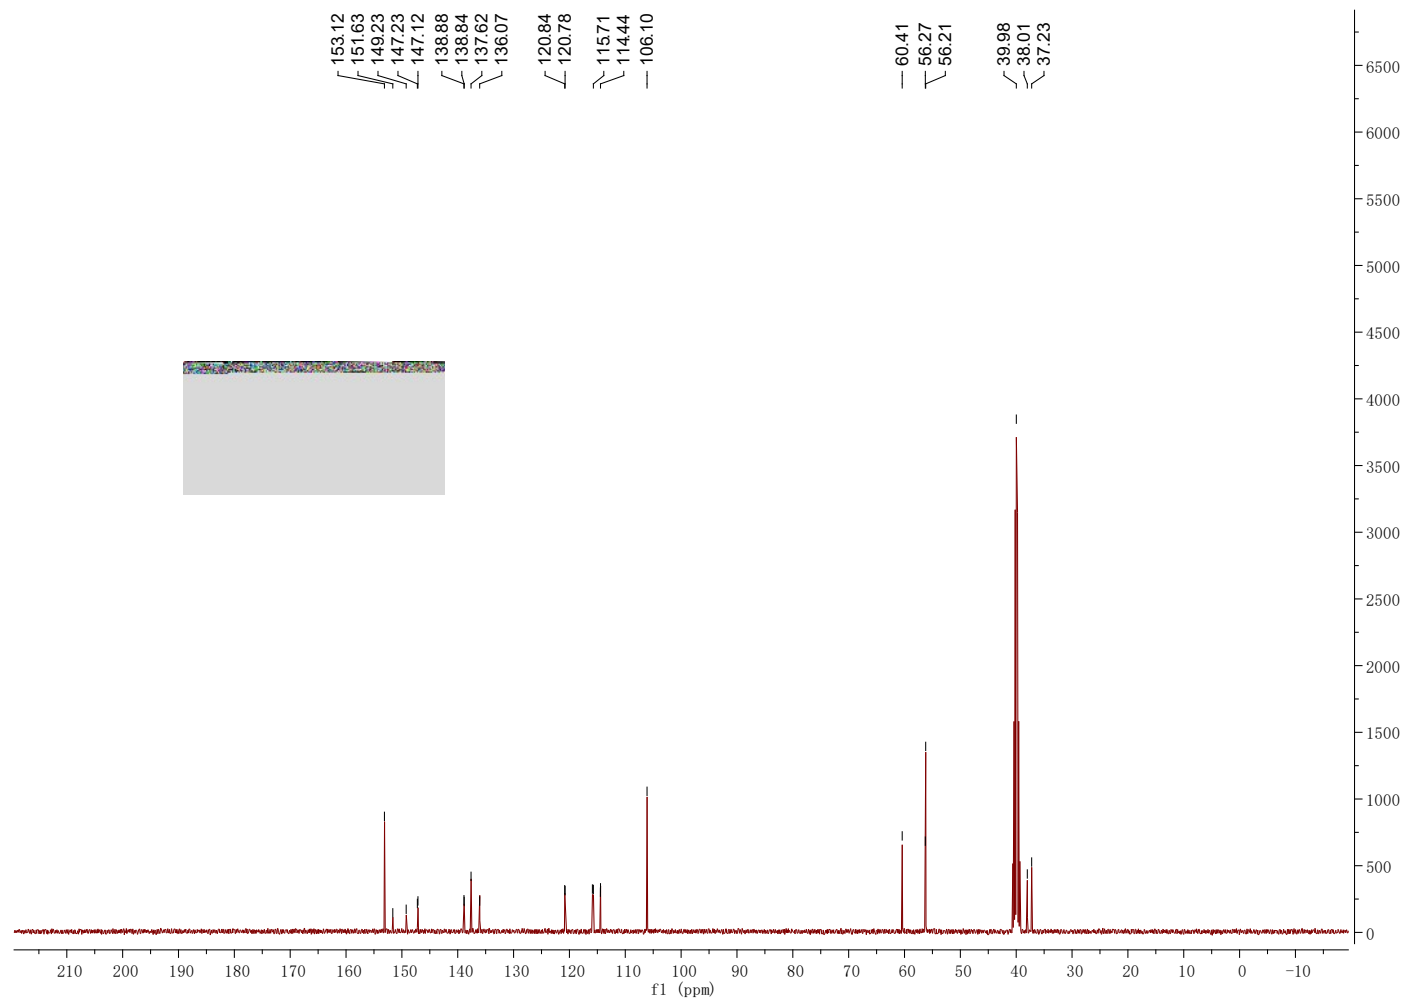

Figure S69. <sup>1</sup>H NMR of Compound 38

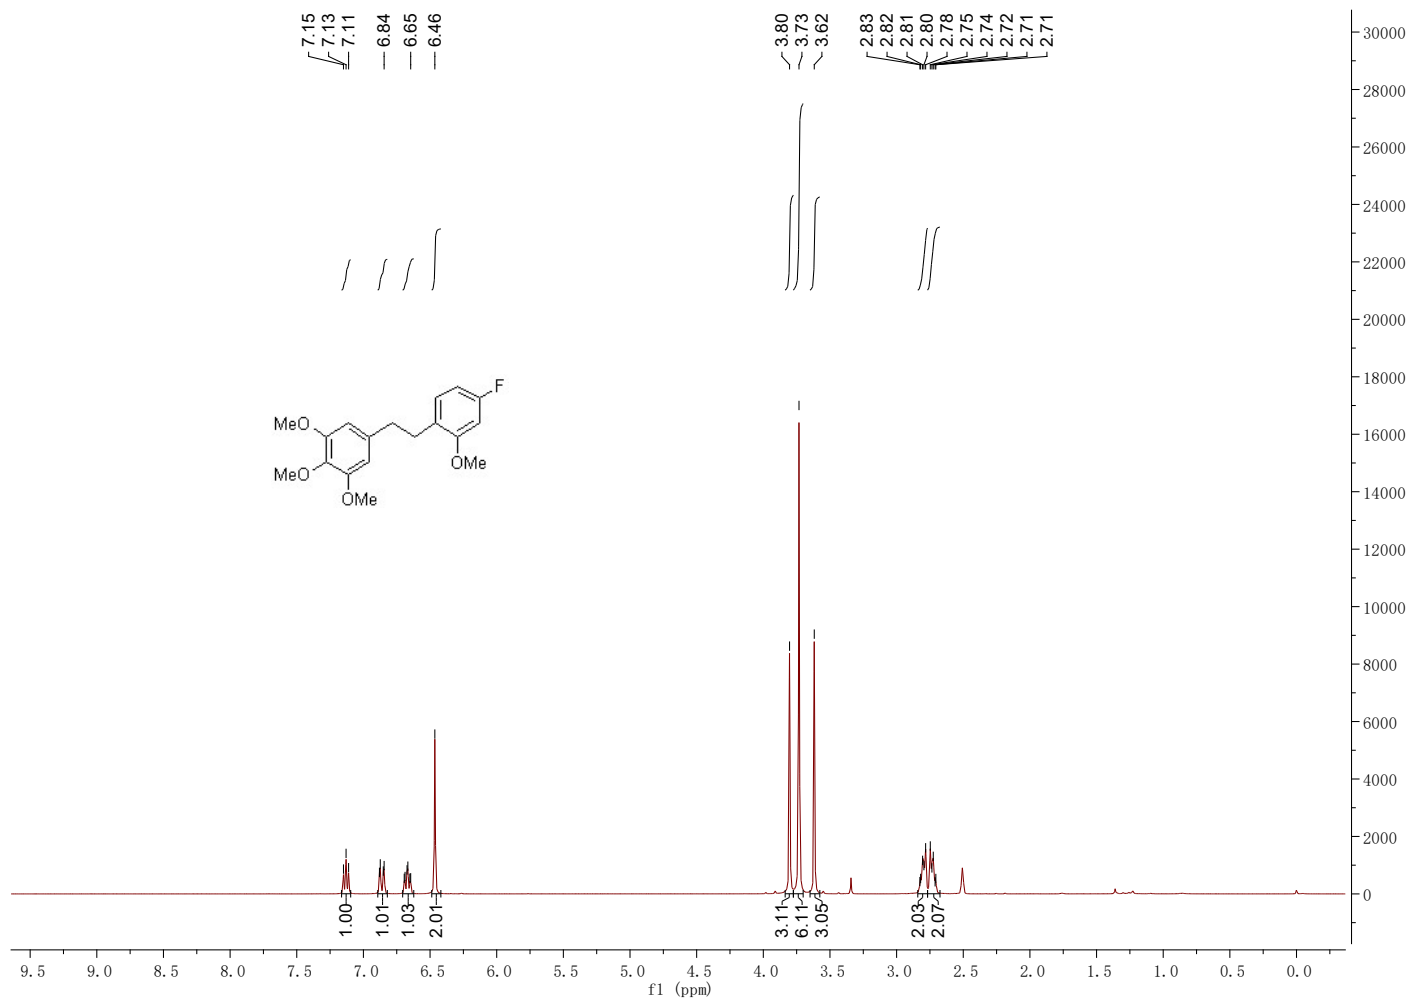

Figure S70.  $^{13}\text{C}$ -NMR of Compound 38

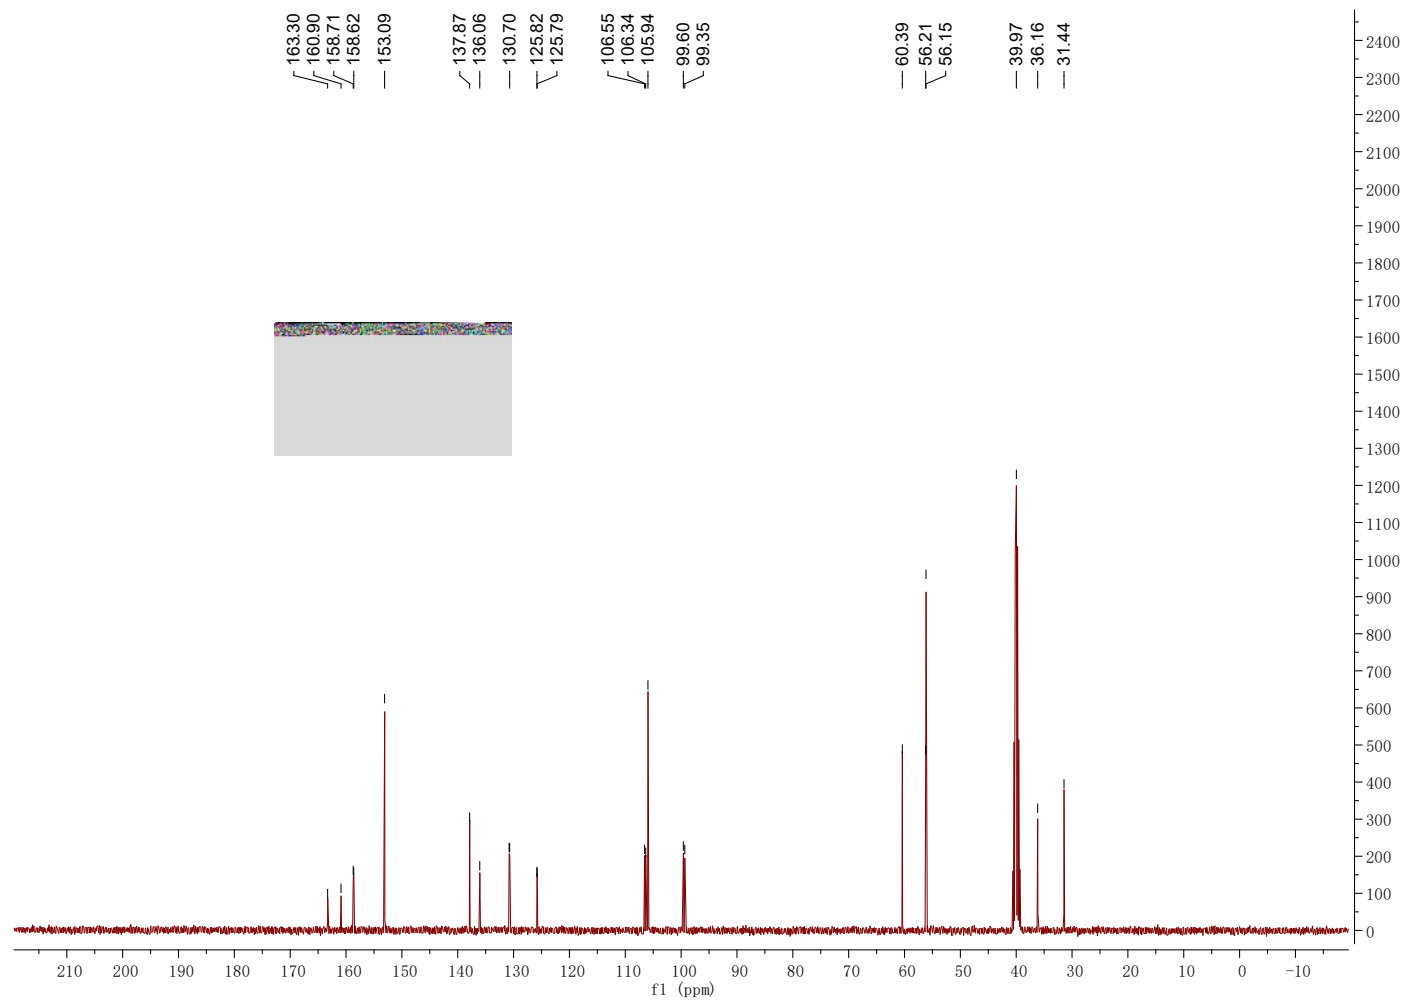

Figure S71. <sup>1</sup>H NMR of Compound 39

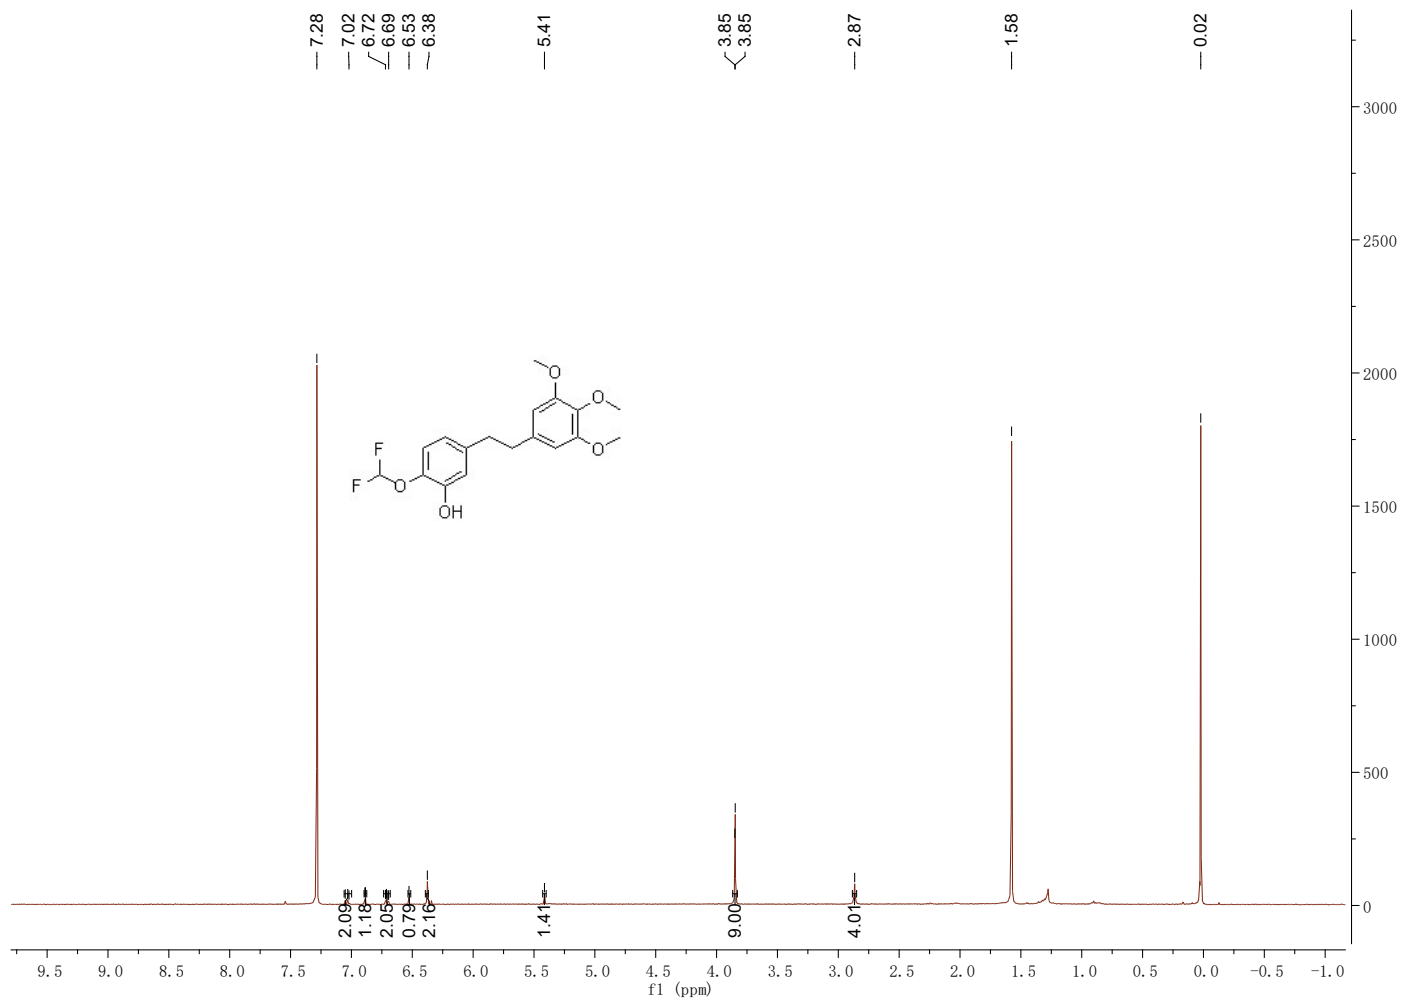

Figure S72.  $^{13}\text{C}$ -NMR of Compound 39

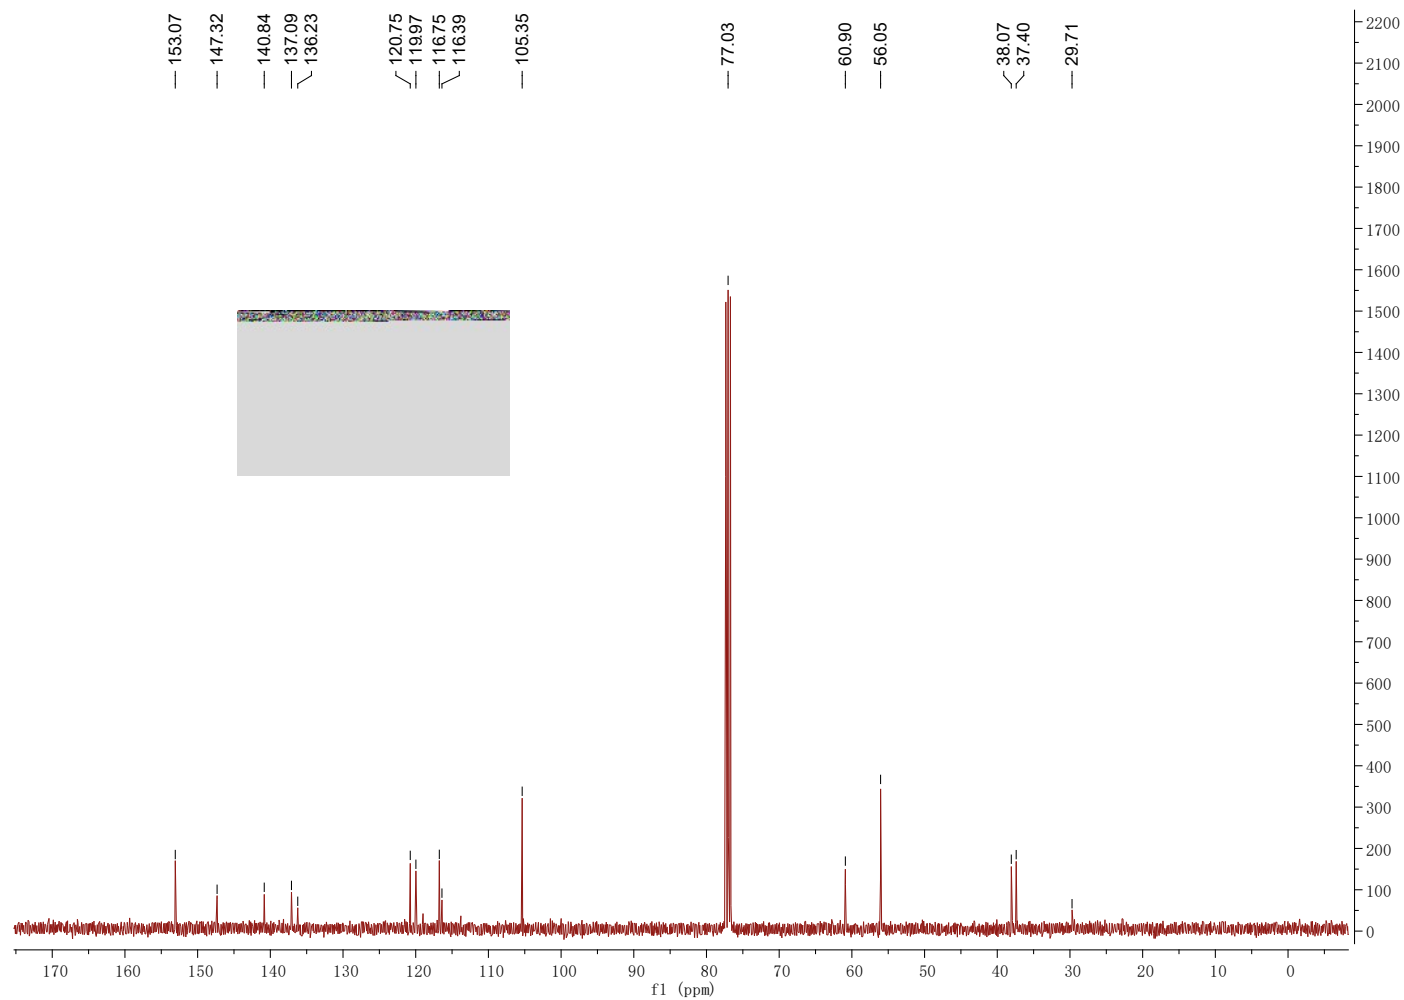

Figure S73. <sup>1</sup>H NMR of Compound 41

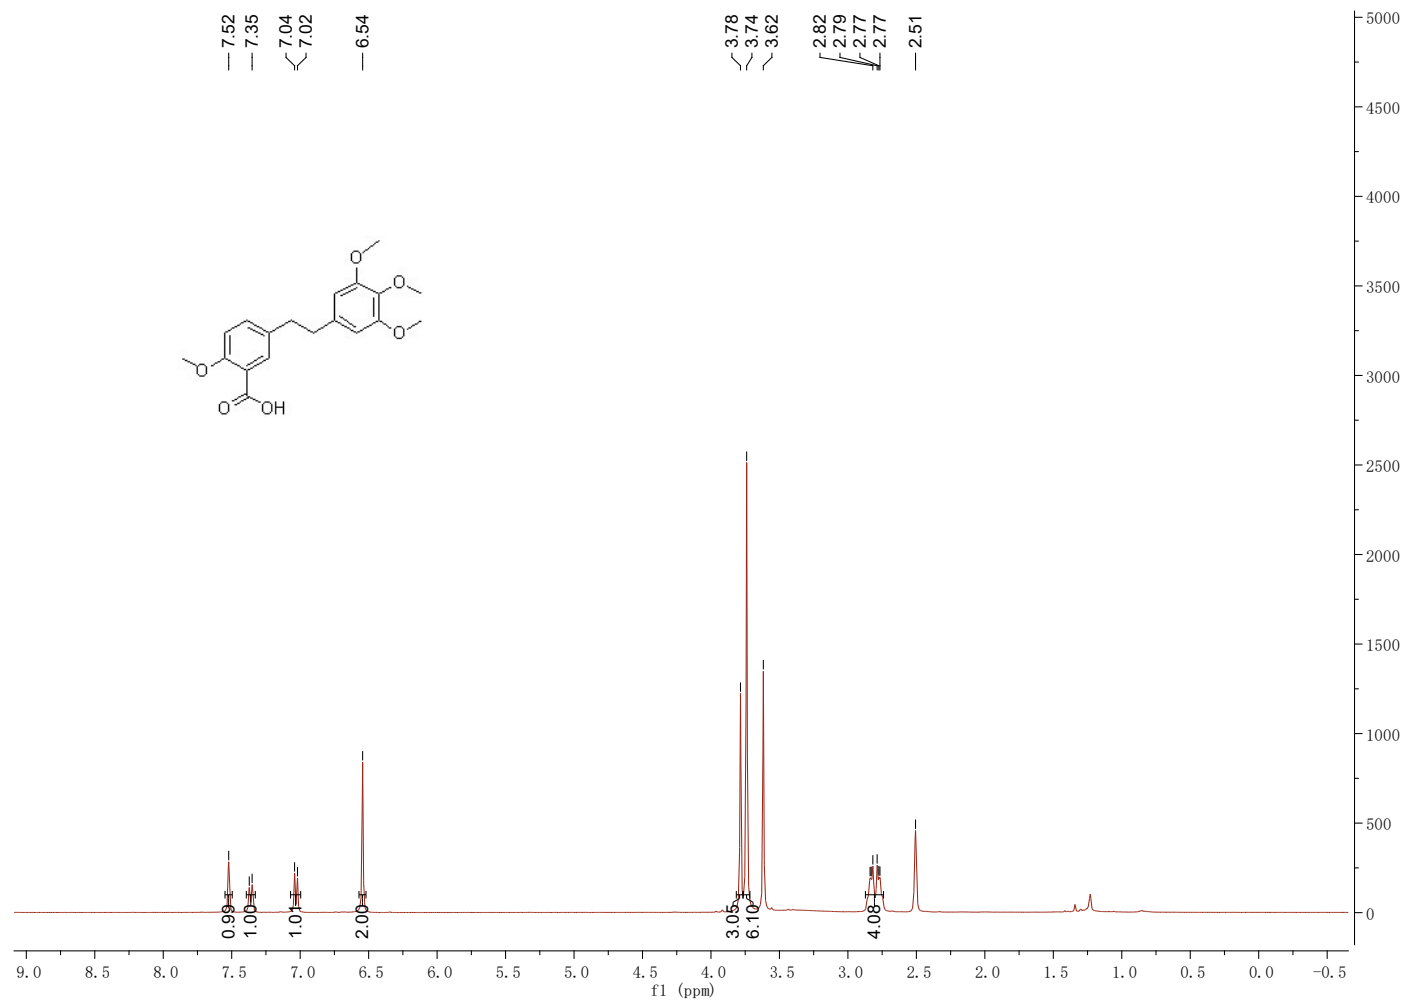

Figure S74.  $^{13}\text{C}$ -NMR of Compound 41

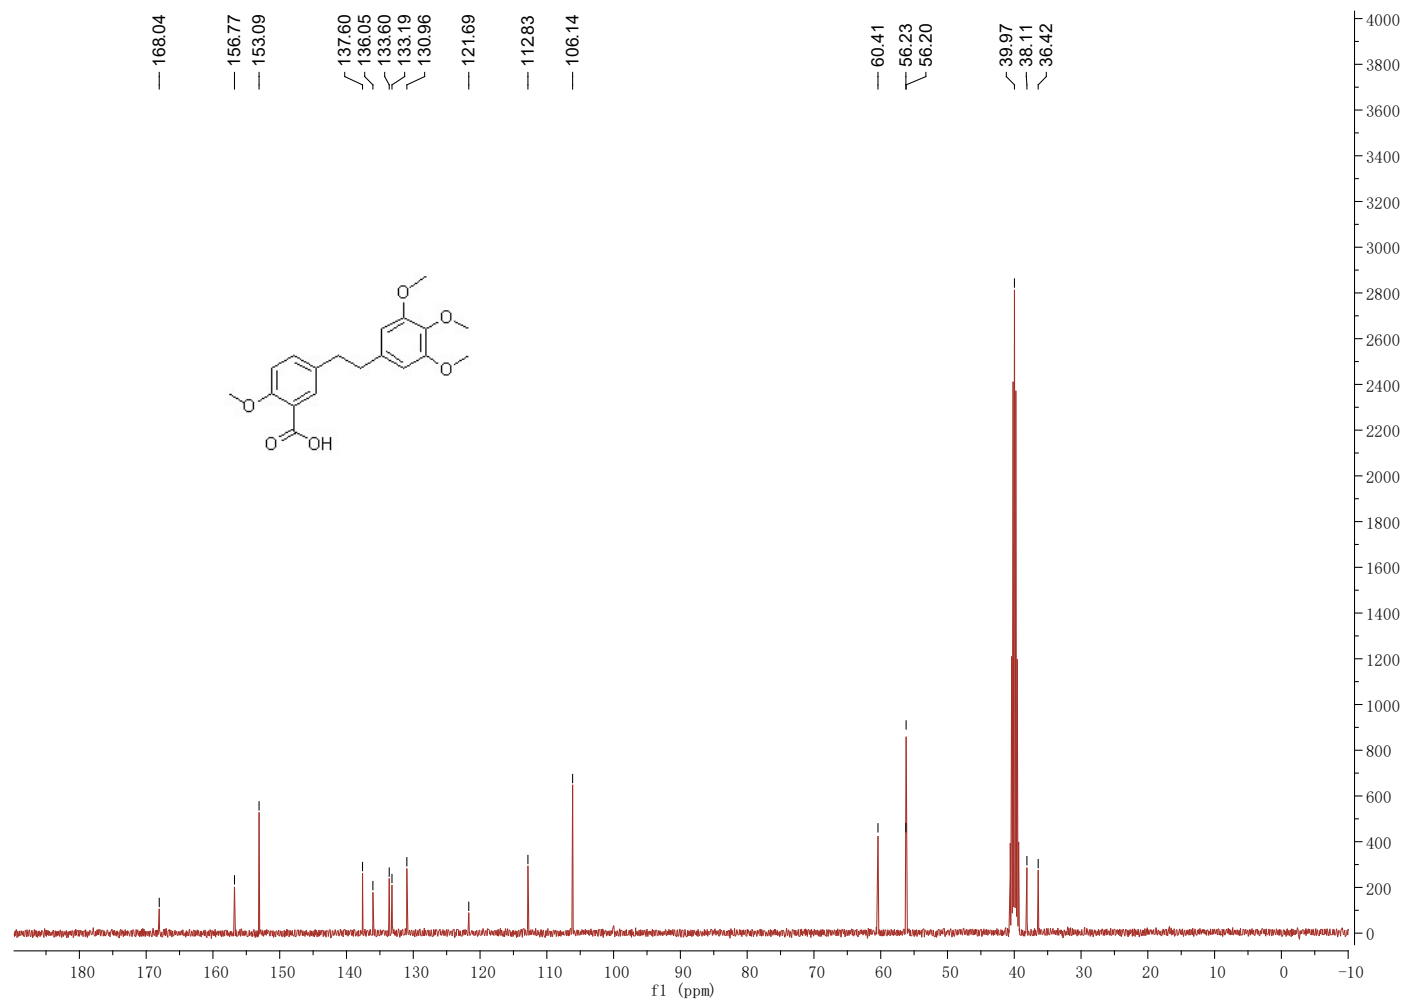



Figure S75. <sup>1</sup>H NMR of Compound 42

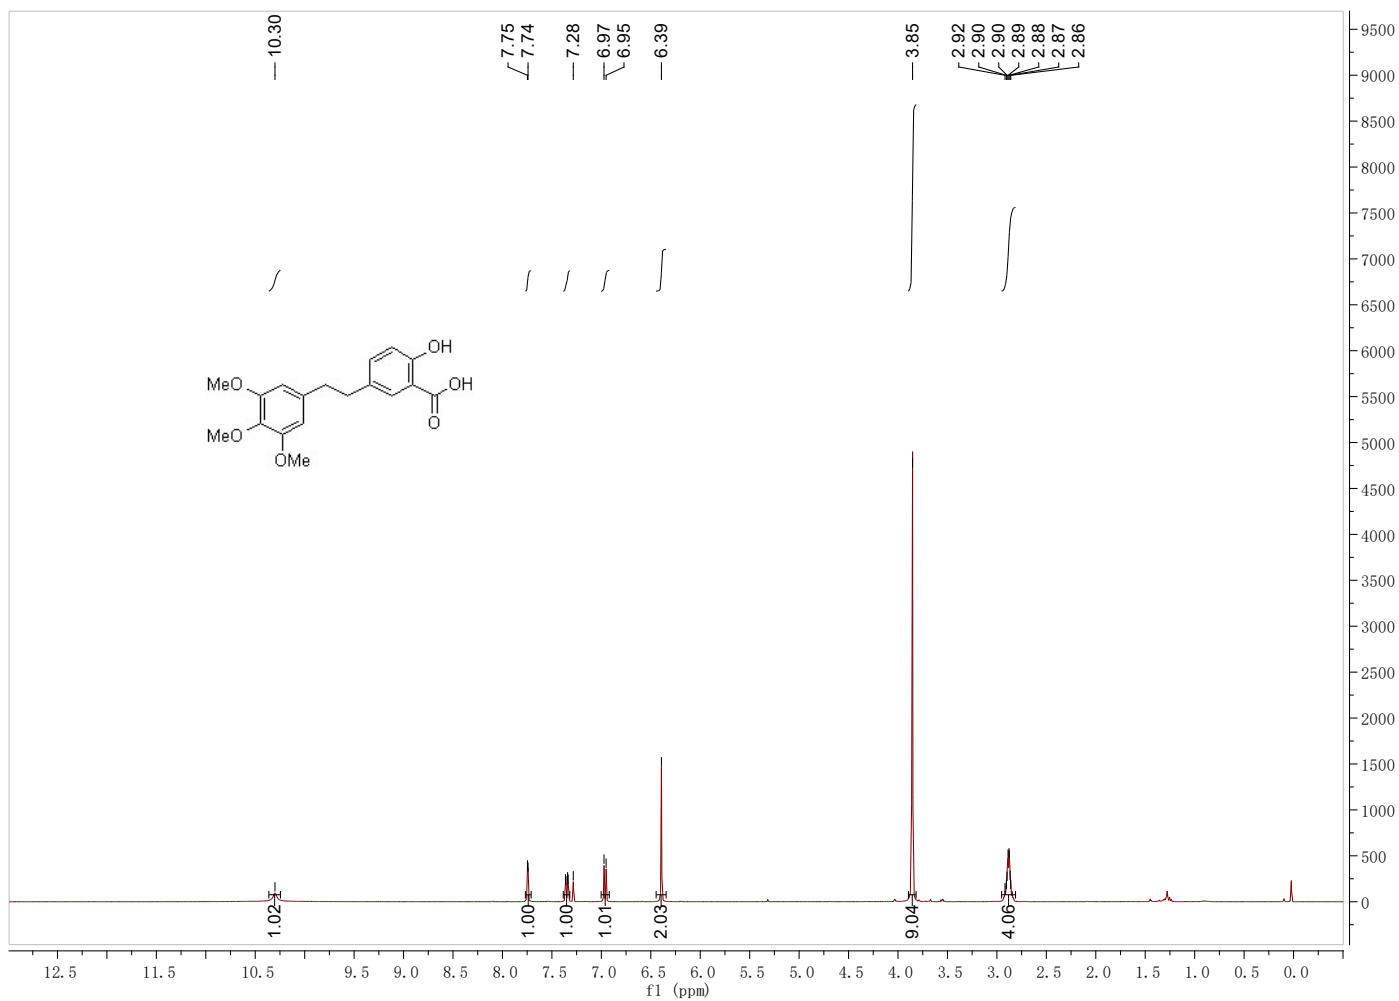

Figure S76.  $^{13}\text{C}$ -NMR of Compound 42

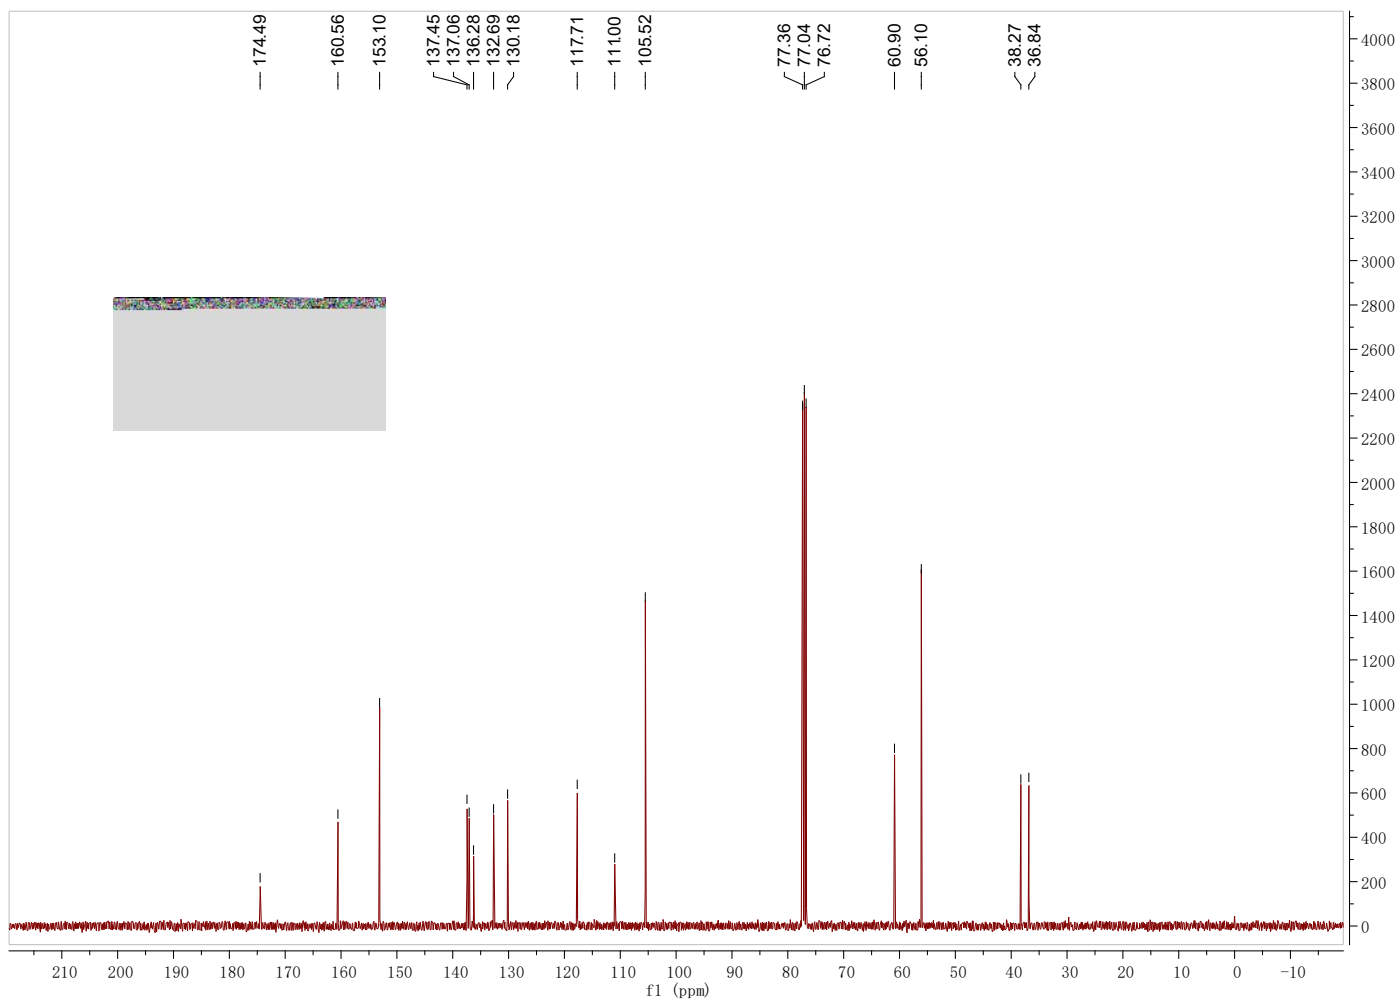

Figure S77. <sup>1</sup>H NMR of Compound 43

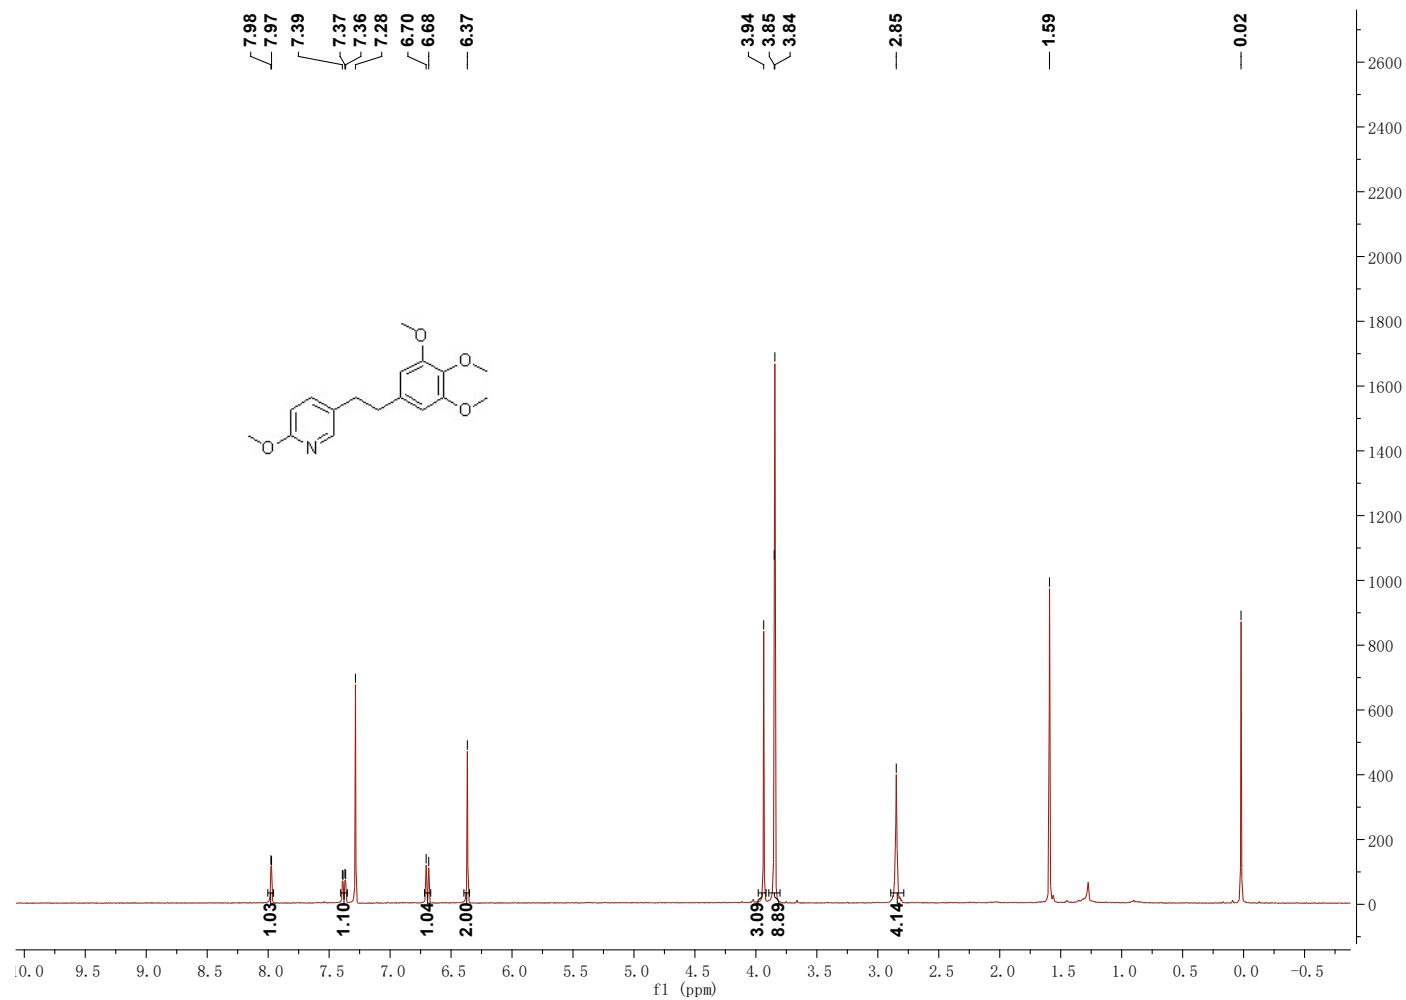

Figure S78.  $^{13}\text{C}$ -NMR of Compound 43

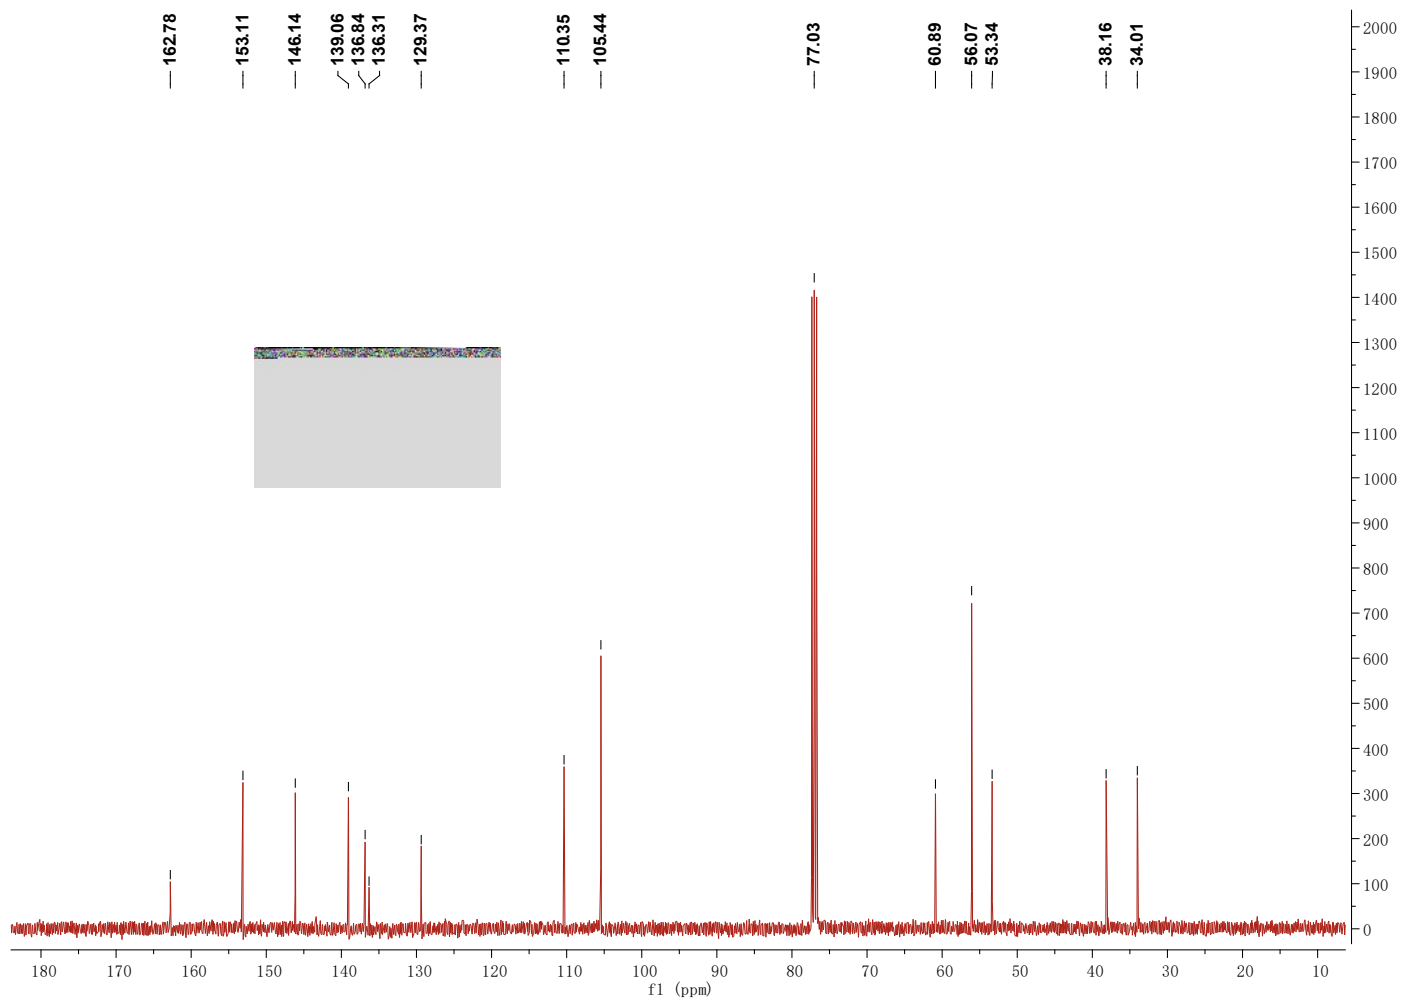

Figure S79. <sup>1</sup>H NMR of Compound 44

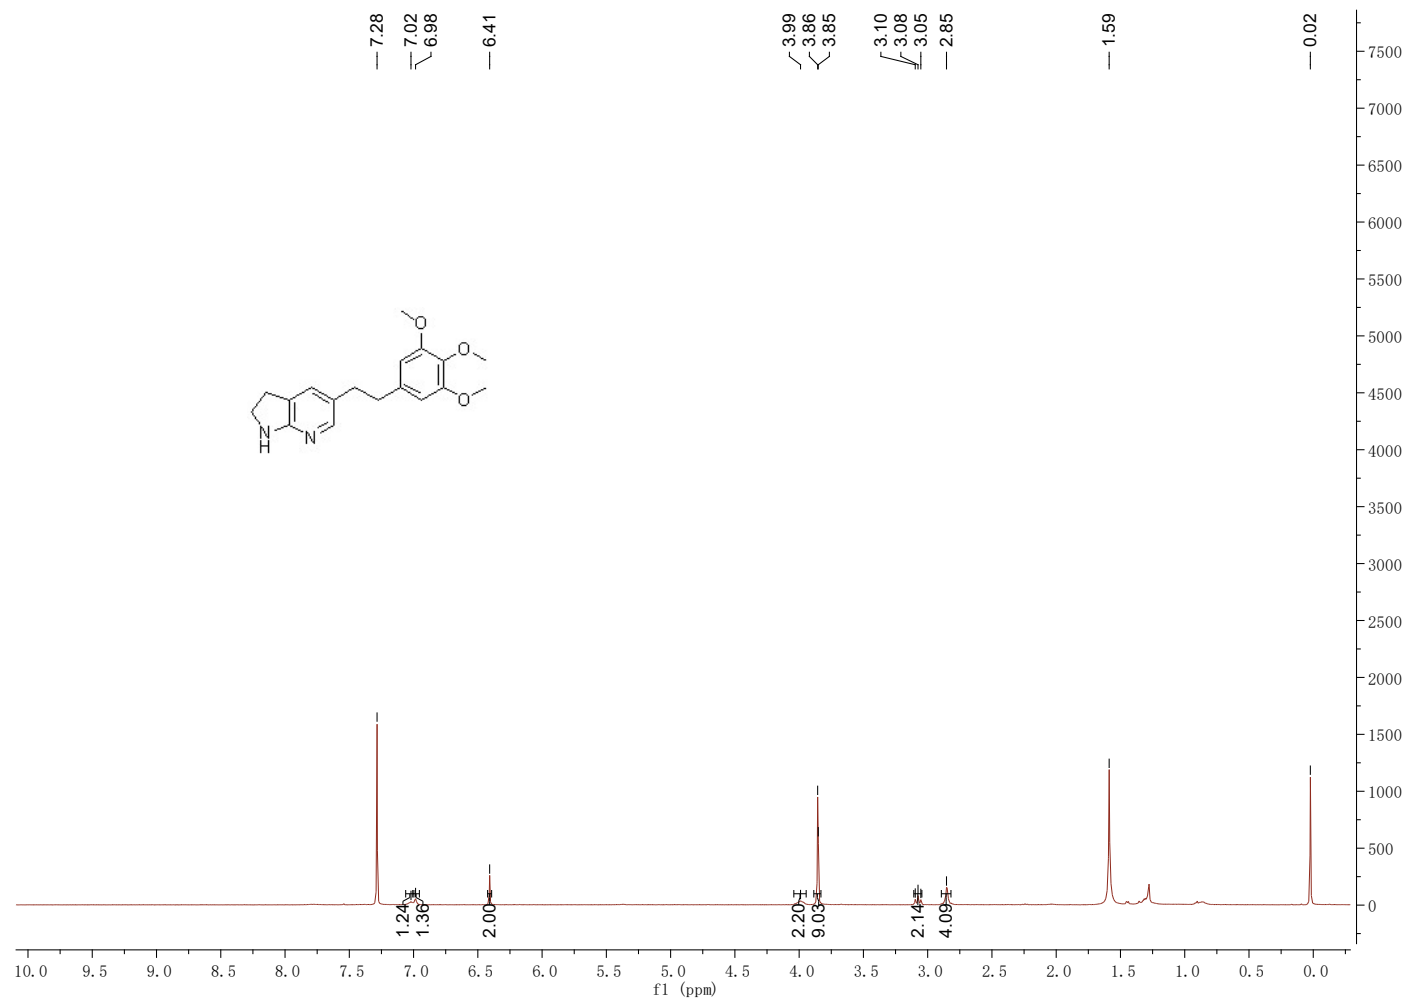

Figure S80.  $^{13}\text{C}$ -NMR of Compound 44

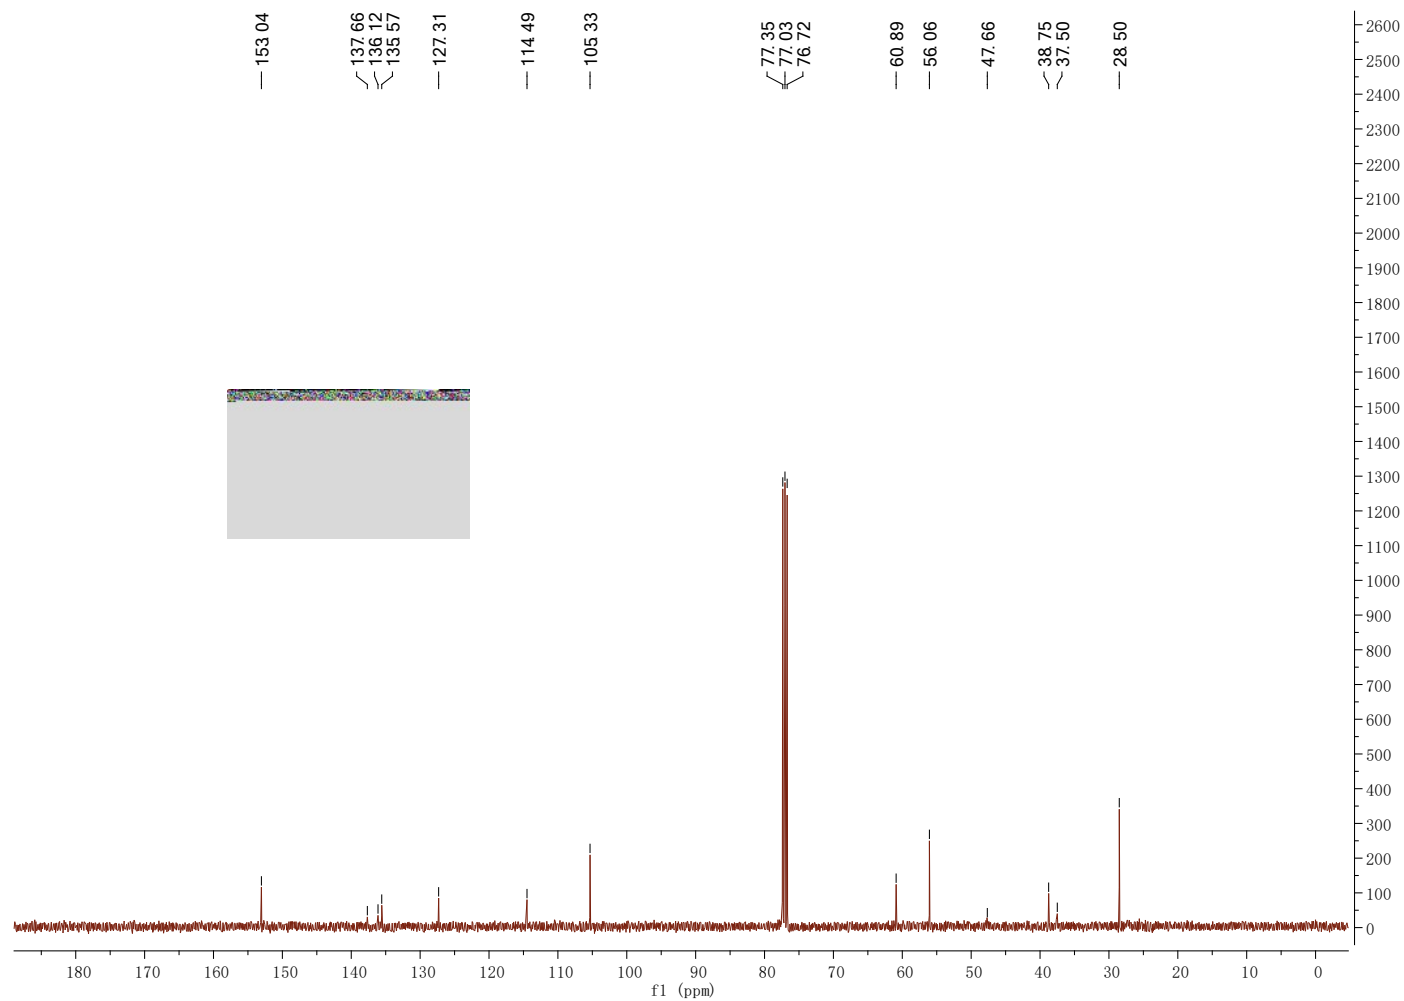

Figure S81. <sup>1</sup>H NMR of Compound 45

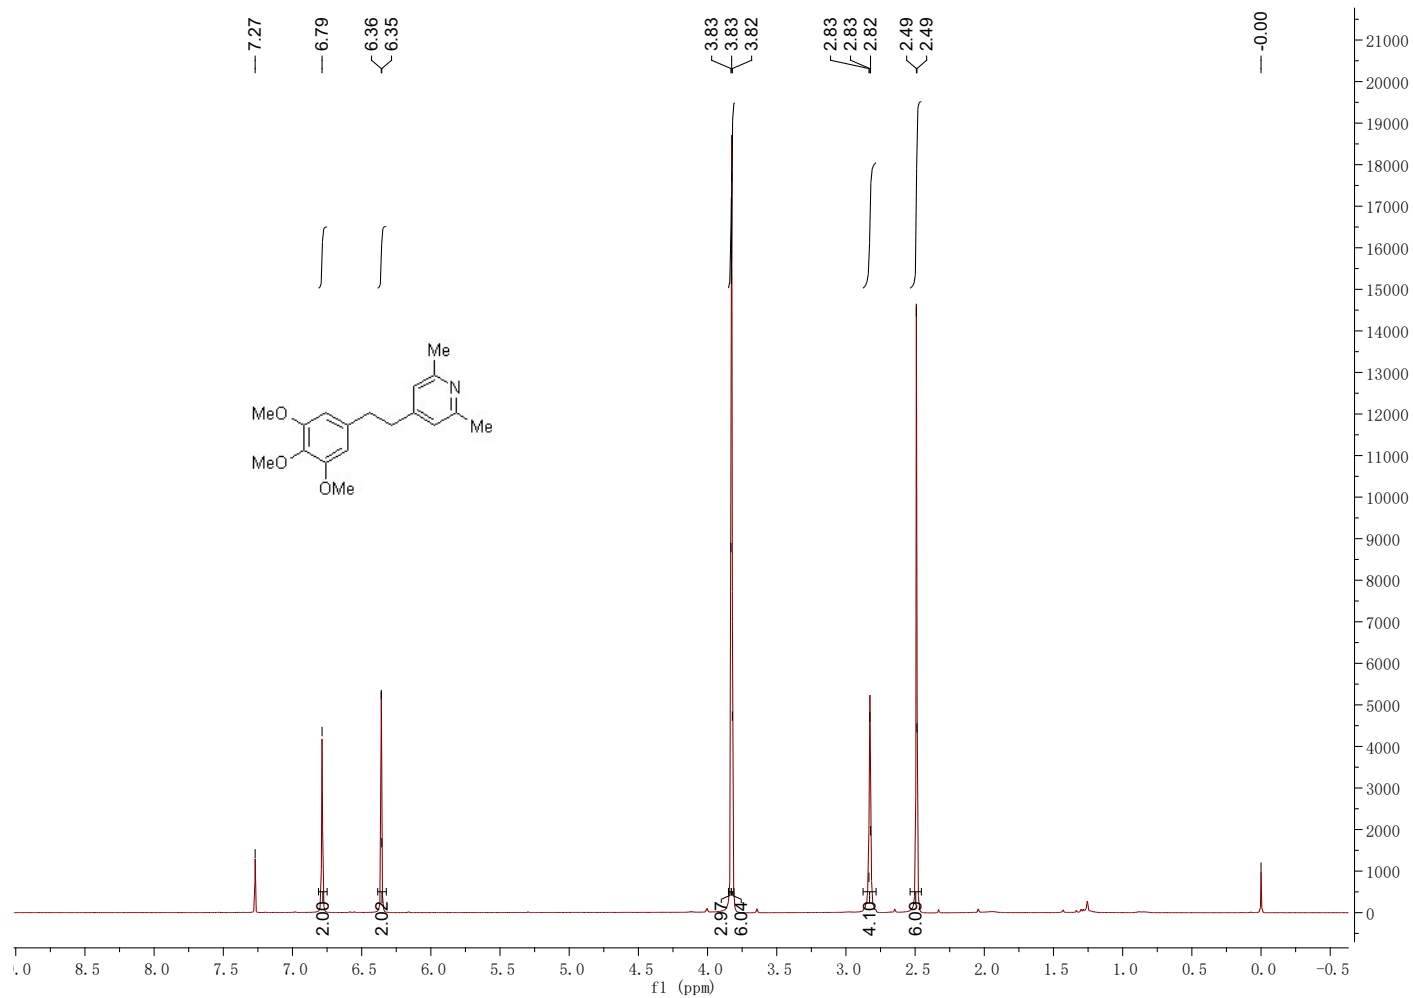

Figure S82.  $^{13}\text{C}$ -NMR of Compound 45

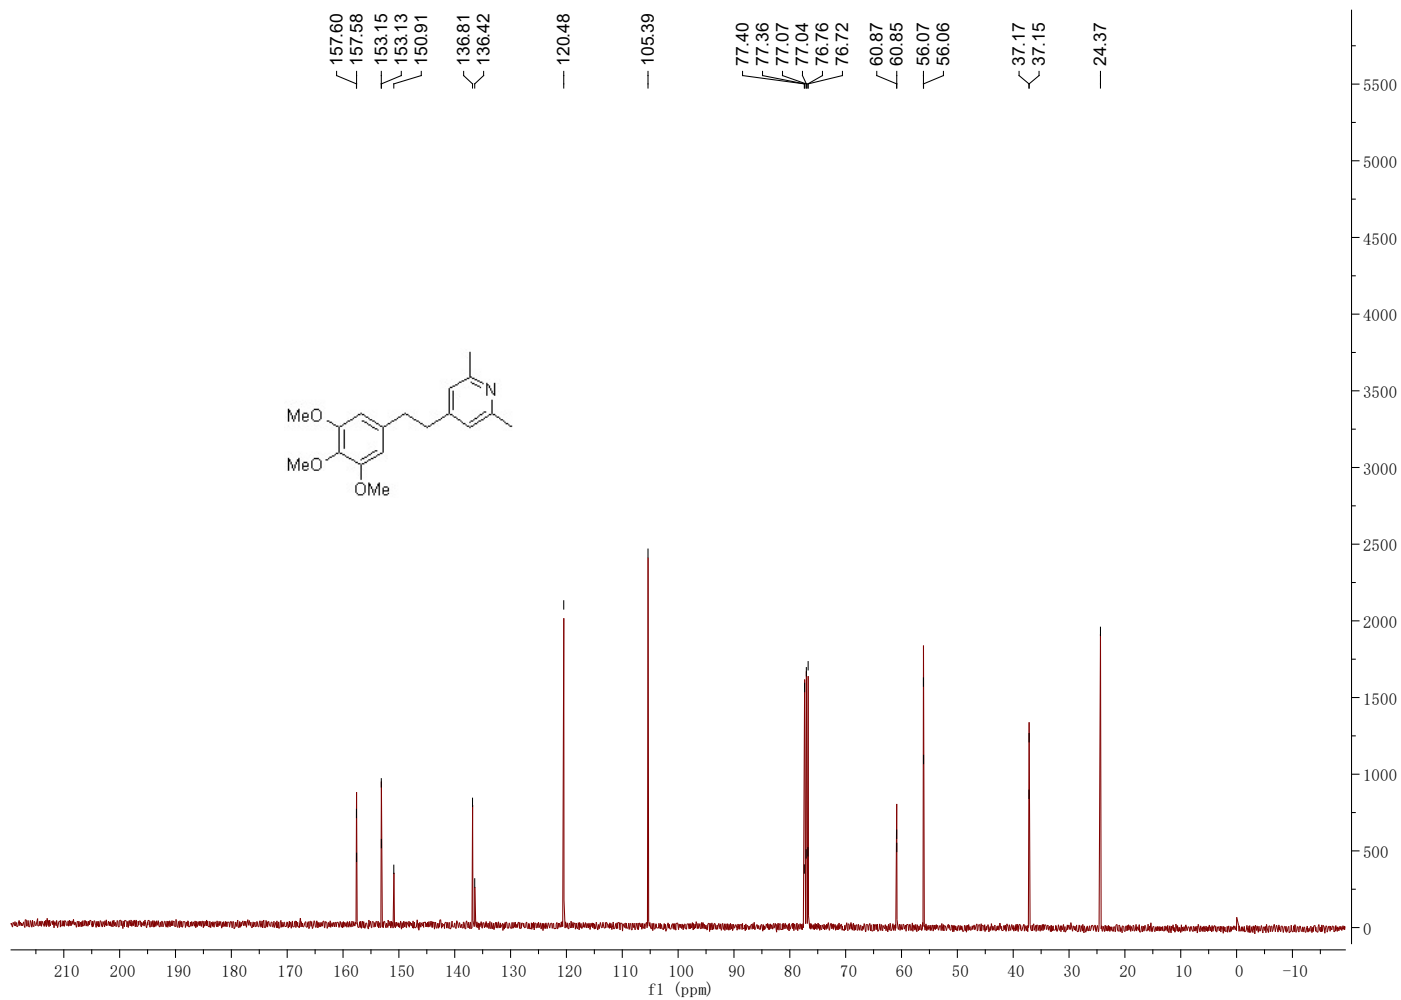



Figure S83. <sup>1</sup>H NMR of Compound 46

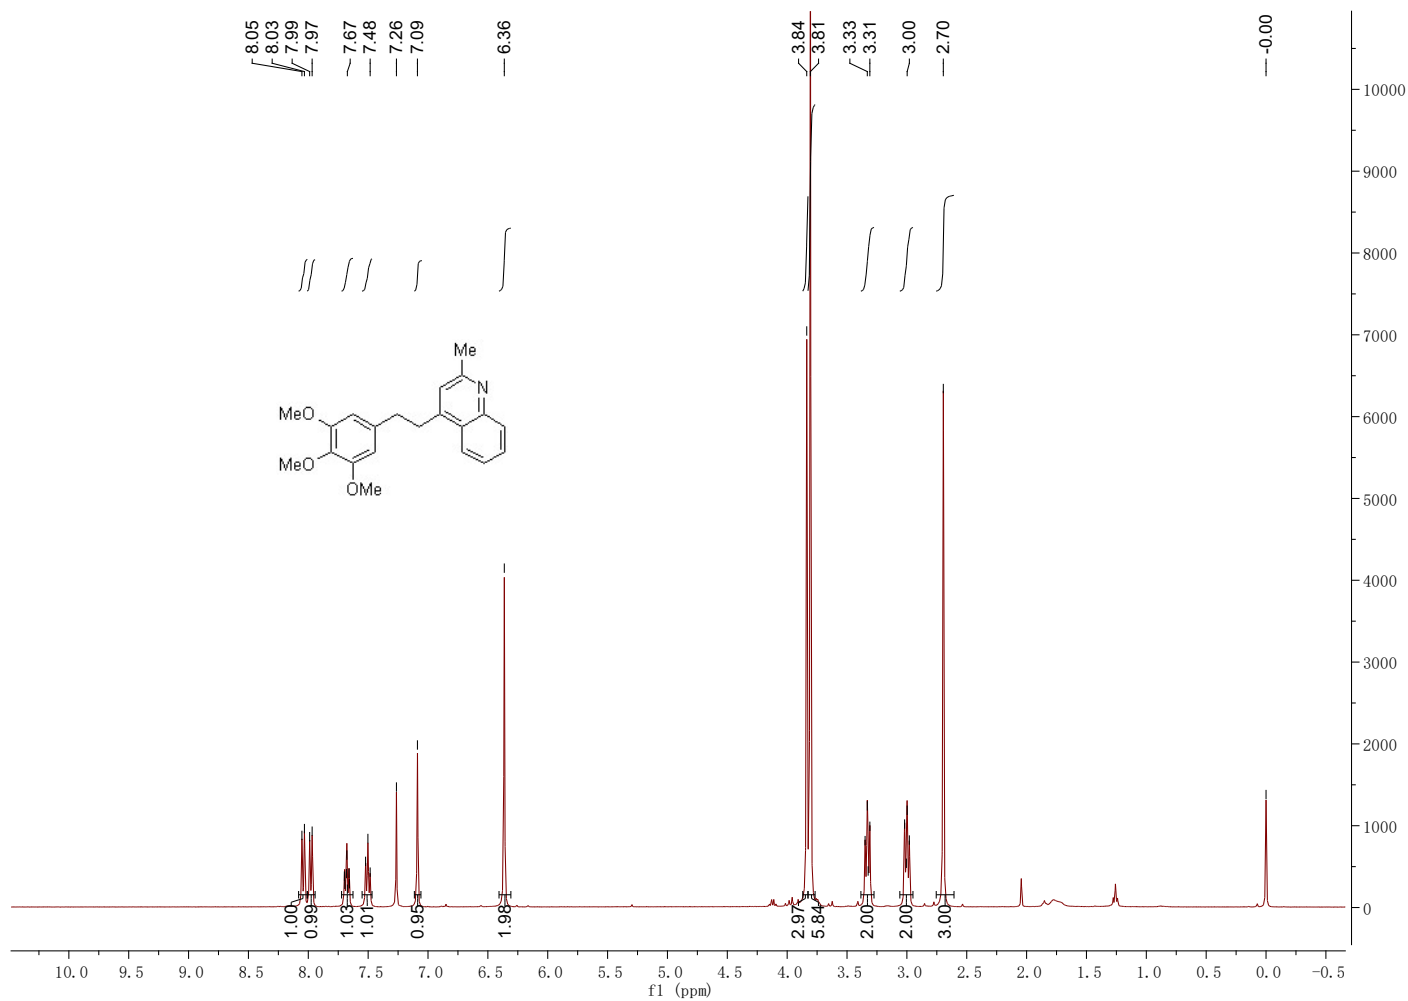

Figure S84.  $^{13}\text{C}$ -NMR of Compound 46

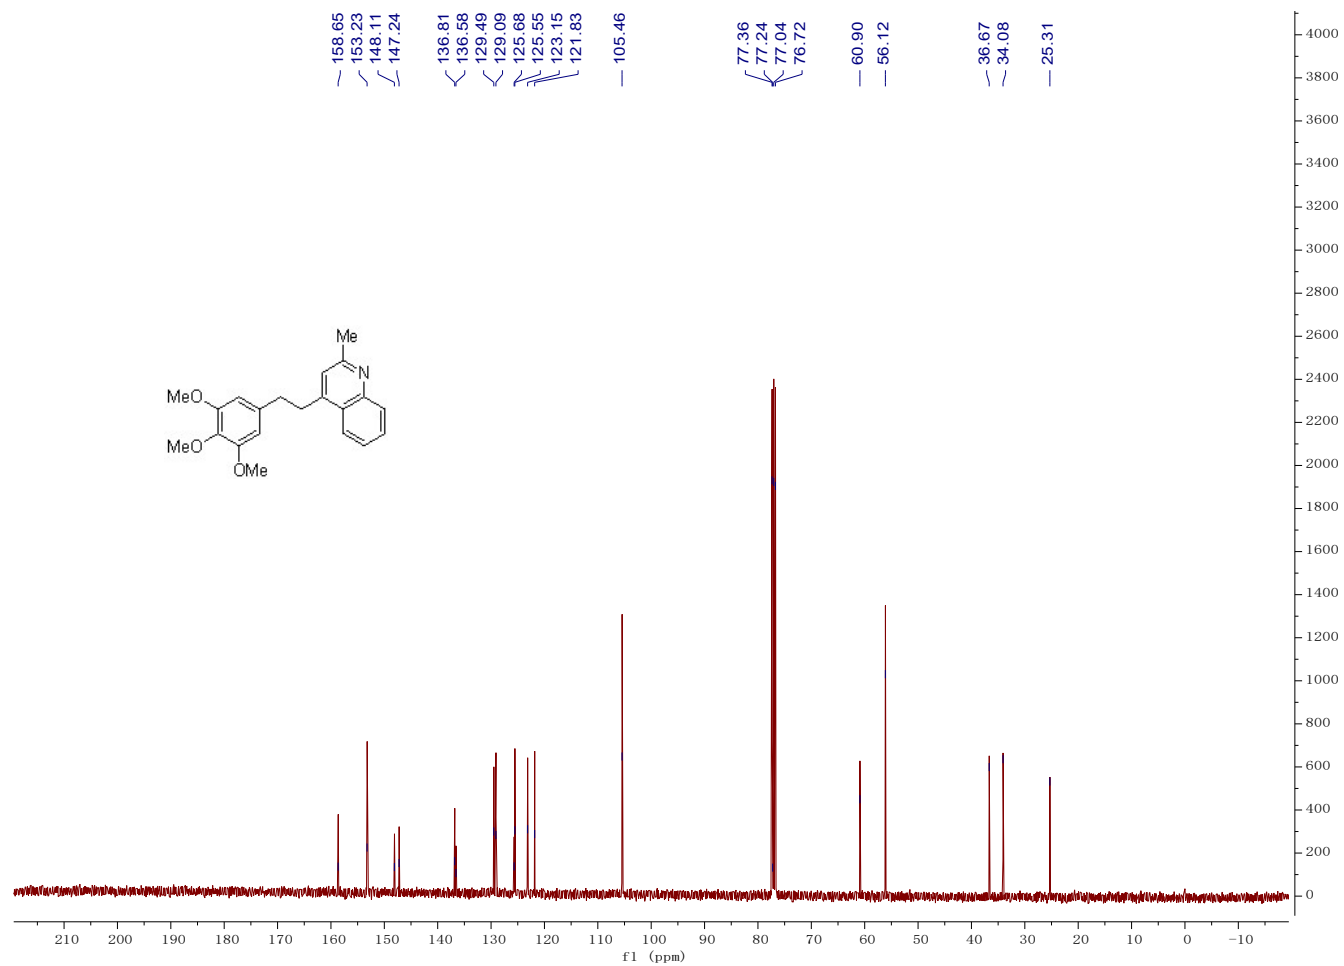

Figure S85.  $^1\text{H}$  NMR of Compound 47

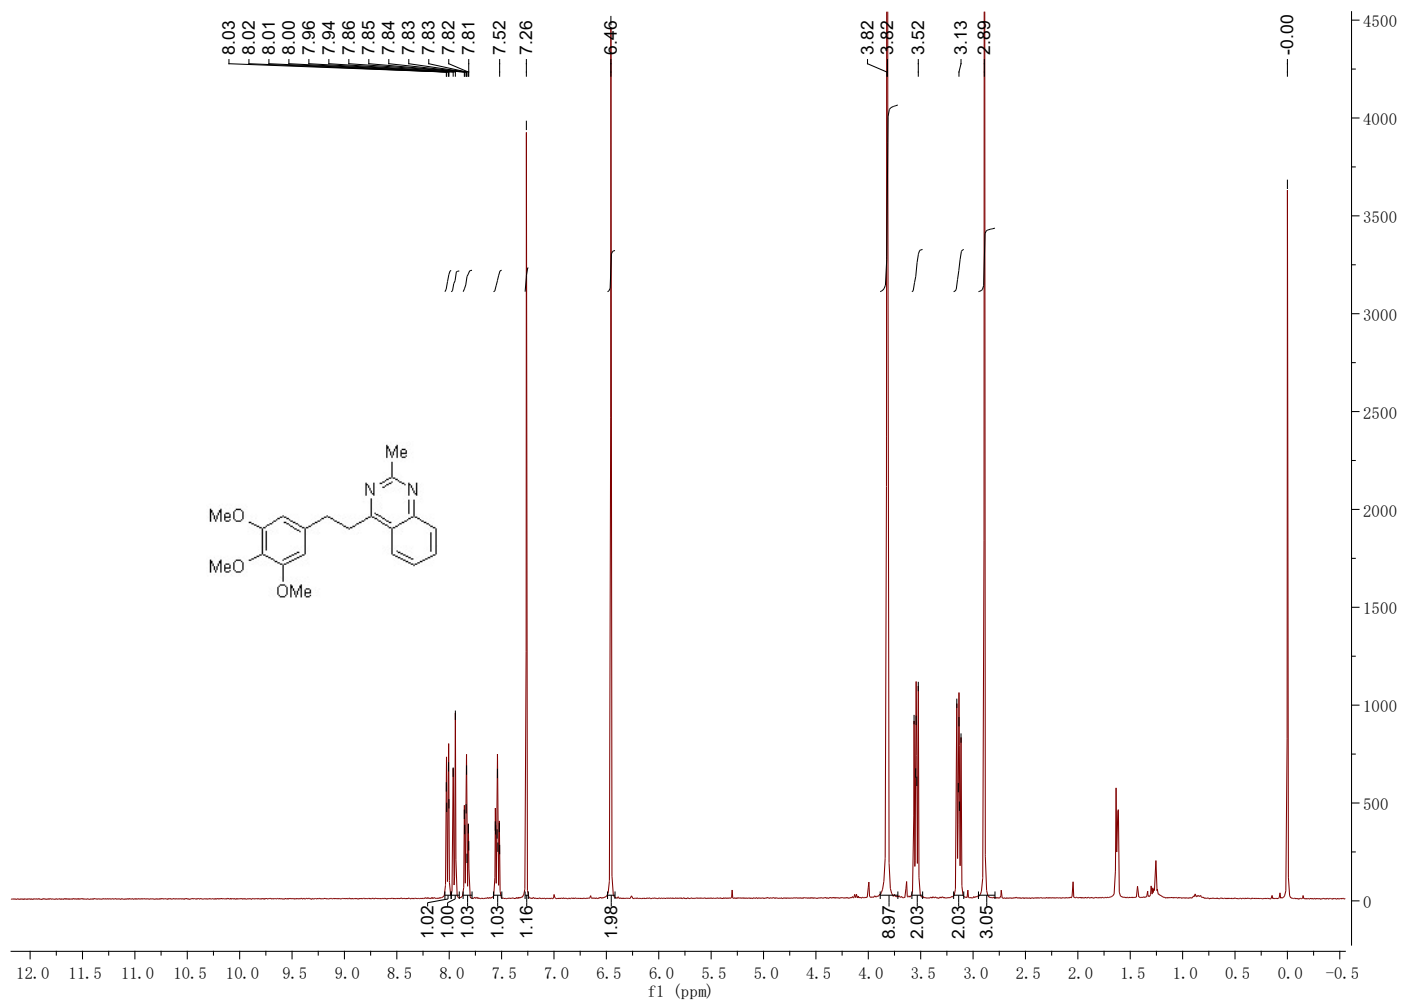

Figure S86.  $^{13}\text{C}$ -NMR of Compound 47

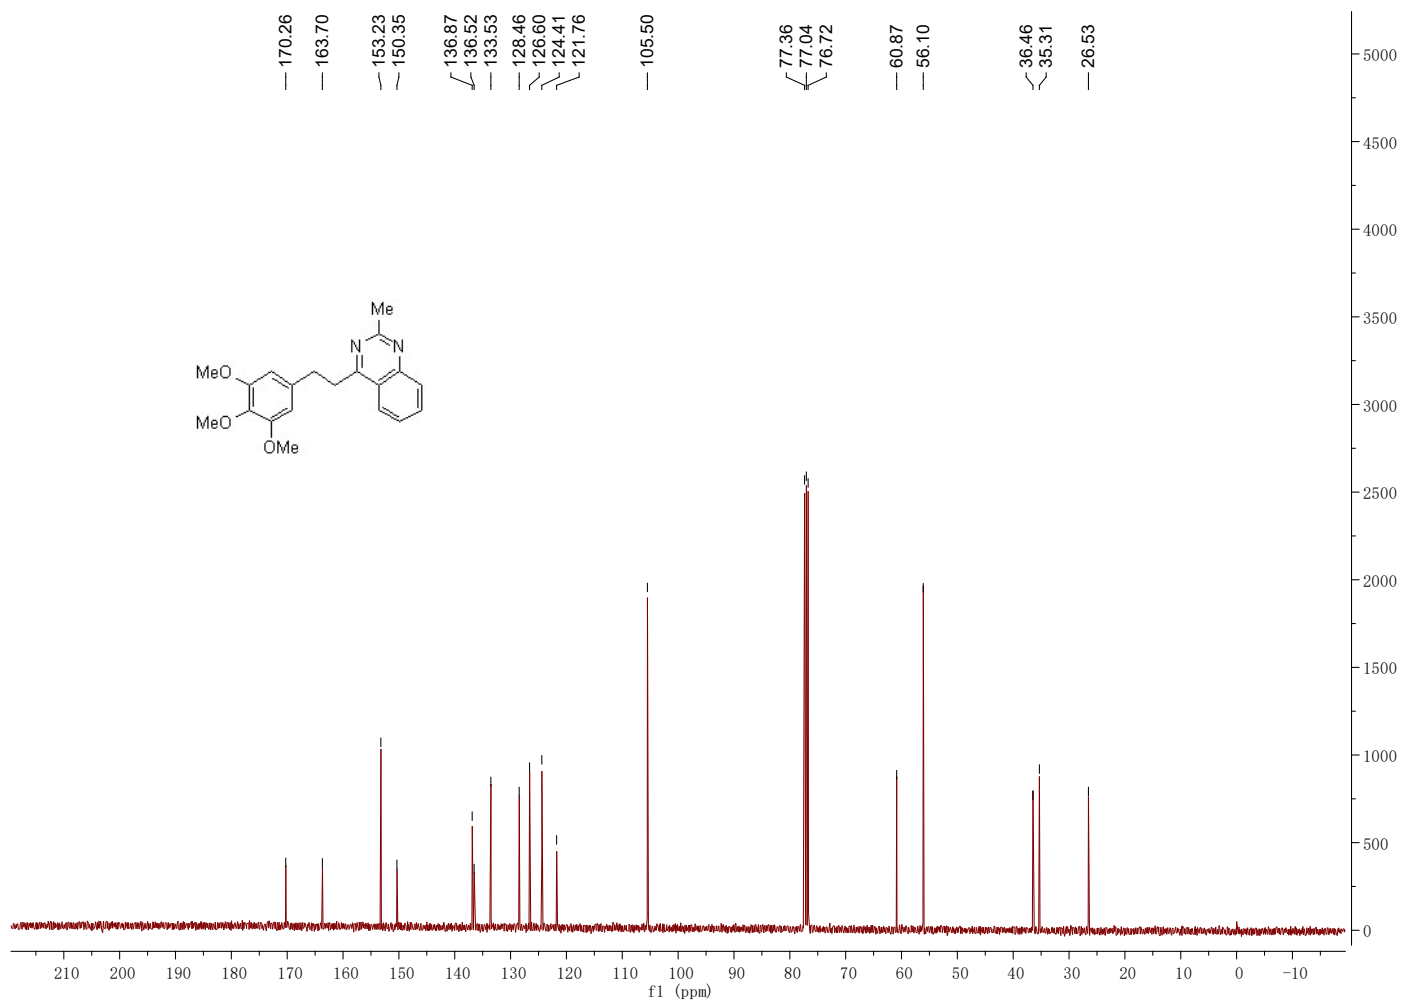

References

- 
1. Z. Getahun, L. Jurd, P.S. Chu, C.M. Lin, E. Hamel, *J. Med. Chem.*, 35 (1992) 1058-1067.
  2. M.-Y. Song, Q.-R. He, Y.-L. Wang, et al. *Int. J. Mol. Sci.*, 2020, **21** (5),1817.
  3. M. Medarde, R. Peláez-Lamamiéde Clairac, A. C. Ramos, E. Caballero, J. L. López, D. G. Grávalos and A. S. Feliciano, *Bioorg. Med. Chem. Lett.*, 1995, **5**, 229-232.
  4. R. Shirai, K. Tokuda, Y. Koiso and S. Iwasaki, *Bioorg. Med. Chem. Lett.*, 1994, **4**, 699-704.
